# Supplementary material
Source: PubMed Central journal article supplement (PMC7088893)
Supplement: pt8b00002_si_001.pdf [file pt8b00002_si_001.pdf]

**Supplementary Biology (SB)**

**Figure SB1.** Activation of four different signaling pathways (cAMP, IP<sub>1</sub>, ERK1/2 and CREB phosphorylation) at four different receptors (CTR, AMY<sub>1-3</sub>) with four different ligands (amylin, CGRP, calcitonin and pramlintide). Data are mean ± s.e.m. of 3-5 biological replicates, as detailed in Tables SB1-4. Data were normalized to human amylin (hAMY) in each experiment. pERK1/2 data are the 15 minute time point.

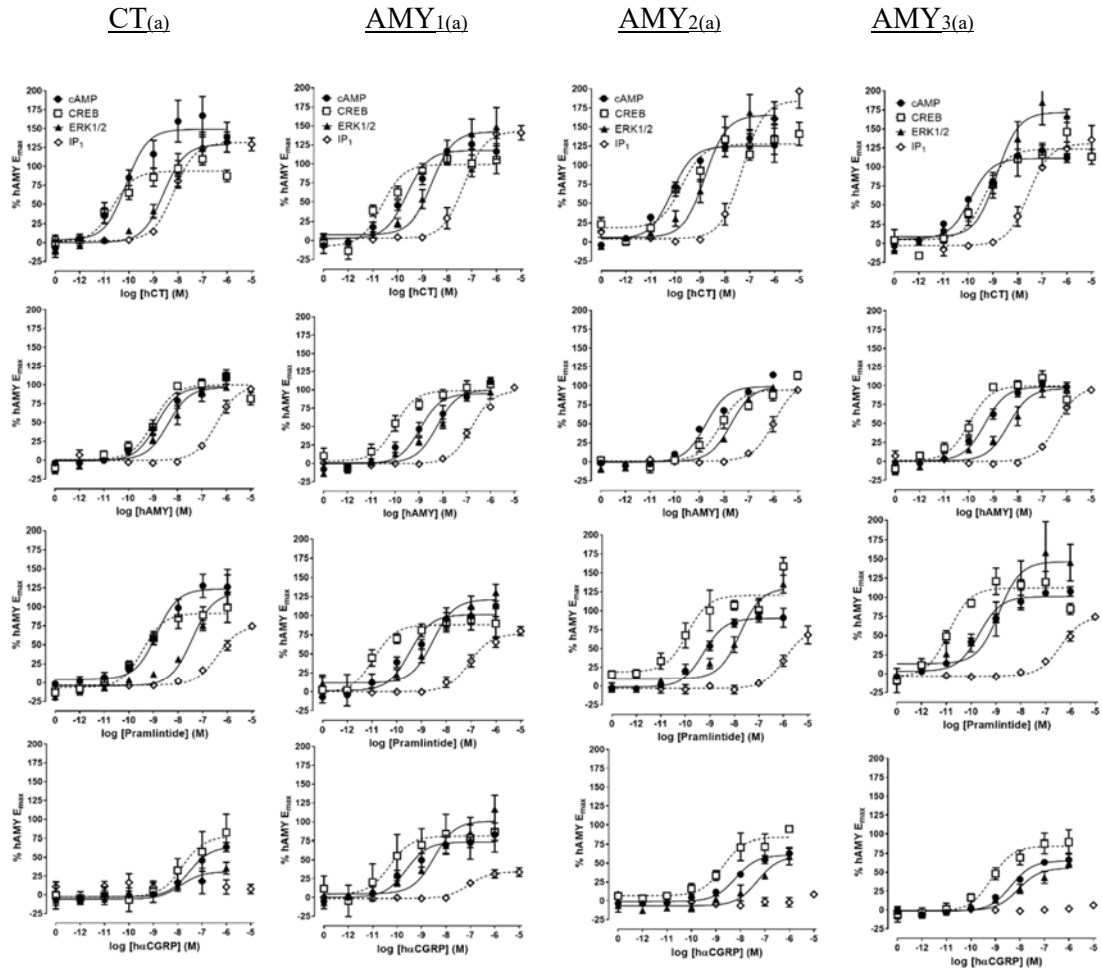

### Supplementary biology data tables 1-4

Data are mean  $\pm$  s.e.m. of  $n$  biological replicates, reporting activation of four different signaling pathways (cAMP, IP<sub>1</sub>, ERK1/2 and CREB phosphorylation) at four different receptors (CTR, AMY<sub>1-3</sub>) with four different ligands (amylin, CGRP, calcitonin and pramlintide). Data were normalised to hAMY in each experiment and E<sub>max</sub> values are % hAMY.

**Table SB1. Signaling Pathways CT<sub>(a)</sub>**

|             | cAMP              |      |                  |      |   | IP <sub>1</sub>   |      |                  |      |   | ERK1/2 (7 min)    |      |                  |      |      | ERK1/2 (15 min)   |      |                  |      |      | CREB              |      |                  |      |   |
|-------------|-------------------|------|------------------|------|---|-------------------|------|------------------|------|---|-------------------|------|------------------|------|------|-------------------|------|------------------|------|------|-------------------|------|------------------|------|---|
|             | pEC <sub>50</sub> | SEM  | E <sub>max</sub> | SEM  | n | pEC <sub>50</sub> | SEM  | E <sub>max</sub> | SEM  | n | pEC <sub>50</sub> | SEM  | E <sub>max</sub> | SEM  | n    | pEC <sub>50</sub> | SEM  | E <sub>max</sub> | SEM  | n    | pEC <sub>50</sub> | SEM  | E <sub>max</sub> | SEM  | n |
| hCT         | 10.2              | 0.07 | 149              | 23.2 | 5 | 8.16              | 0.02 | 132              | 12.1 | 4 | 8.29              | 0.12 | 147              | 13.8 | 4    | 8.68              | 0.08 | 145              | 10.0 | 4    | 10.9              | 0.18 | 94.4             | 6.90 | 4 |
| hAMY        | 8.73              | 0.21 | 100              |      | 5 | 6.49              | 0.04 | 100              |      | 4 | 7.08              | 0.14 | 100              |      | 4    | 7.48              | 0.26 | 100              |      | 4    | 9.06              | 0.10 | 100              |      | 5 |
| Pramlintide | 8.85              | 0.22 | 127              | 20.2 | 5 | 6.41              | 0.06 | 84.2             | 12.1 | 4 | 7.04              | 0.18 | 137              | 15.4 | 4    | 7.50              | 0.29 | 128              | 32.2 | 4    | 9.47              | 0.22 | 95.5             | 15.9 | 5 |
| hαCGRP      | 7.49              | 0.13 | 66.0             | 6.20 | 5 | <5                |      |                  |      | 4 | <5                |      |                  | 4    | 7.76 | 0.28              | 33.6 | 9.20             | 4    | 7.77 | 0.33              | 82.6 | 25.2             | 5    |   |

**Table SB2. Signaling Pathways AMY<sub>1(a)</sub>**

|             | cAMP              |      |                  |      |   | IP <sub>1</sub>   |      |                  |      |   | ERK1/2 (7 min)    |      |                  |      |   | ERK1/2 (15 min)   |      |                  |      |   | CREB              |      |                  |      |   |
|-------------|-------------------|------|------------------|------|---|-------------------|------|------------------|------|---|-------------------|------|------------------|------|---|-------------------|------|------------------|------|---|-------------------|------|------------------|------|---|
|             | pEC <sub>50</sub> | SEM  | E <sub>max</sub> | SEM  | n | pEC <sub>50</sub> | SEM  | E <sub>max</sub> | SEM  | n | pEC <sub>50</sub> | SEM  | E <sub>max</sub> | SEM  | n | pEC <sub>50</sub> | SEM  | E <sub>max</sub> | SEM  | n | pEC <sub>50</sub> | SEM  | E <sub>max</sub> | SEM  | n |
| hCT         | 9.62              | 0.11 | 118              | 12.7 | 5 | 7.35              | 0.09 | 142              | 5.80 | 4 | 8.36              | 0.10 | 158              | 16.9 | 4 | 8.55              | 0.17 | 146              | 22.0 | 4 | 10.6              | 0.24 | 93.7             | 6.60 | 5 |
| hAMY        | 8.77              | 0.37 | 100              |      | 5 | 6.76              | 0.13 | 100              |      | 4 | 8.14              | 0.11 | 100              |      | 4 | 8.40              | 0.15 | 100              |      | 4 | 9.99              | 0.28 | 100              |      | 5 |
| Pramlintide | 9.53              | 0.17 | 102              | 13.0 | 5 | 7.09              | 0.17 | 76.1             | 5.90 | 4 | 8.22              | 0.16 | 161              | 14.4 | 4 | 8.43              | 0.17 | 122              | 11.7 | 4 | 10.9              | 0.21 | 95.8             | 17.6 | 4 |
| hαCGRP      | 9.39              | 0.28 | 76.2             | 7.10 | 5 | 7.05              | 0.10 | 34.5             | 5.80 | 4 | 8.39              | 0.14 | 99.9             | 9.50 | 4 | 8.55              | 0.19 | 101              | 15.0 | 4 | 10.4              | 0.15 | 80.7             | 24.0 | 5 |

**Table SB3. Signaling Pathways AMY<sub>2(a)</sub>**

|             | cAMP              |      |                  |      |   | IP <sub>1</sub>   |      |                  |      |   | ERK1/2 (7 min)    |      |                  |      |   | ERK1/2 (15 min)   |      |                  |      |   | CREB              |      |                  |      |   |
|-------------|-------------------|------|------------------|------|---|-------------------|------|------------------|------|---|-------------------|------|------------------|------|---|-------------------|------|------------------|------|---|-------------------|------|------------------|------|---|
|             | pEC <sub>50</sub> | SEM  | E <sub>max</sub> | SEM  | n | pEC <sub>50</sub> | SEM  | E <sub>max</sub> | SEM  | n | pEC <sub>50</sub> | SEM  | E <sub>max</sub> | SEM  | n | pEC <sub>50</sub> | SEM  | E <sub>max</sub> | SEM  | n | pEC <sub>50</sub> | SEM  | E <sub>max</sub> | SEM  | n |
| hCT         | 10.1              | 0.17 | 126              | 10.0 | 5 | 7.36              | 0.18 | 195              | 49.1 | 4 | 8.22              | 0.05 | 172              | 5.90 | 4 | 8.56              | 0.21 | 171              | 15.7 | 4 | 10.6              | 0.24 | 133              | 7.70 | 5 |
| hAMY        | 8.66              | 0.11 | 100              |      | 5 | 5.90              | 0.24 | 100              |      | 4 | 7.50              | 0.20 | 100              |      | 4 | 7.67              | 0.09 | 100              |      | 4 | 9.14              | 0.22 | 100              |      | 5 |
| Pramlintide | 9.23              | 0.17 | 91.4             | 6.60 | 5 | 5.95              | 0.05 | 75.0             | 14.4 | 4 | 7.39              | 0.26 | 126              | 19.7 | 4 | 7.70              | 0.16 | 132              | 9.30 | 4 | 9.77              | 0.47 | 133              | 12.4 | 5 |
| hαCGRP      | 8.21              | 0.18 | 62.0             | 6.90 | 5 | <5                |      |                  |      | 4 | 7.49              | 0.38 | 49.3             | 11.7 | 4 | 7.64              | 0.29 | 57.9             | 12.0 | 4 | 8.45              | 0.29 | 92.0             | 6.80 | 4 |

**Table SB4. Signaling Pathways AMY<sub>3(a)</sub>**

|             | cAMP              |      |                  |      |   | IP <sub>1</sub>   |      |                  |      |   | ERK1/2 (7 min)    |      |                  |      |   | ERK1/2 (15 min)   |      |                  |      |   | CREB              |      |                  |      |   |
|-------------|-------------------|------|------------------|------|---|-------------------|------|------------------|------|---|-------------------|------|------------------|------|---|-------------------|------|------------------|------|---|-------------------|------|------------------|------|---|
|             | pEC <sub>50</sub> | SEM  | E <sub>max</sub> | SEM  | n | pEC <sub>50</sub> | SEM  | E <sub>max</sub> | SEM  | n | pEC <sub>50</sub> | SEM  | E <sub>max</sub> | SEM  | n | pEC <sub>50</sub> | SEM  | E <sub>max</sub> | SEM  | n | pEC <sub>50</sub> | SEM  | E <sub>max</sub> | SEM  | n |
| hCT         | 9.85              | 0.17 | 111              | 5.70 | 5 | 7.62              | 0.20 | 132              | 13.1 | 4 | 8.31              | 0.12 | 151              | 7.70 | 5 | 8.73              | 0.18 | 175              | 17.3 | 4 | 10.5              | 0.15 | 123              | 13.8 | 5 |
| hAMY        | 9.32              | 0.18 | 100              |      | 5 | 6.33              | 0.10 | 100              |      | 4 | 7.96              | 0.16 | 100              |      | 5 | 8.30              | 0.33 | 100              |      | 4 | 10.0              | 0.14 | 100              |      | 5 |
| Pramlintide | 9.65              | 0.14 | 102              | 4.10 | 5 | 6.46              | 0.18 | 72.8             | 3.70 | 4 | 7.72              | 0.29 | 115              | 7.20 | 5 | 8.67              | 0.35 | 151              | 28.2 | 4 | 11.0              | 0.21 | 112              | 7.40 | 5 |
| hαCGRP      | 8.39              | 0.23 | 66.9             | 5.80 | 5 | <5                |      |                  |      | 3 | 7.95              | 0.49 | 60.3             | 18.5 | 5 | 7.97              | 0.41 | 58.2             | 1.90 | 4 | 9.13              | 0.07 | 84.3             | 12.2 | 5 |

**Figure SB2.** Amino acid sequence alignment of amylin from different species. The majority of sequences are of pre-pro amylin with only the predicted mature fully processed sequence listed. Sequences that are not complete correspond to partial. The residues are color-coded according to their properties as follows: dark blue/purple, positive; red, negative or small polar; purple, polar; blue/cyan, aromatic; green large hydrophobic; yellow, small hydrophobic. This corresponds to the ‘Taylor’ scheme, as implemented in Jalview<sup>1</sup>. The annotations indicate the conservation, quality of the alignment and the consensus.

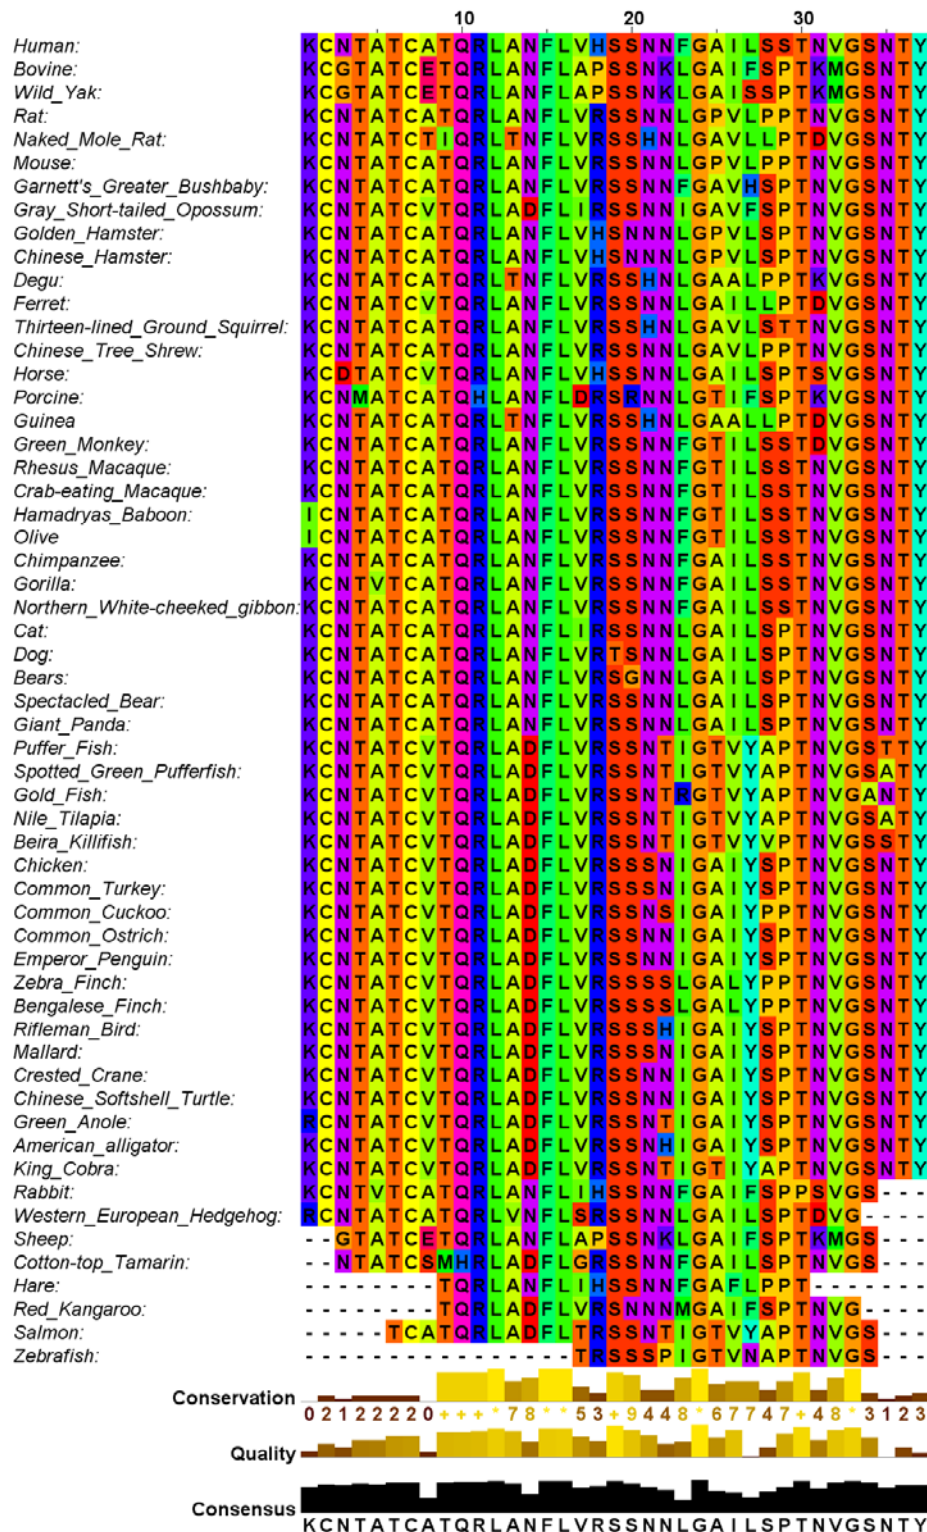

**Figures SB3-21.** cAMP production by peptide analogues or competition binding data, as indicated. Data are mean  $\pm$  s.e.m. of  $n$  biological replicates as shown. \* $P < 0.05$  by unpaired  $t$ -test for  $pEC_{50}$  or  $pIC_{50}$  or where 95% confidence intervals did not include 100 for  $E_{max}$ .

**Figure SB3.** C-terminal Alanine Analogues: hCT<sub>(a)</sub>

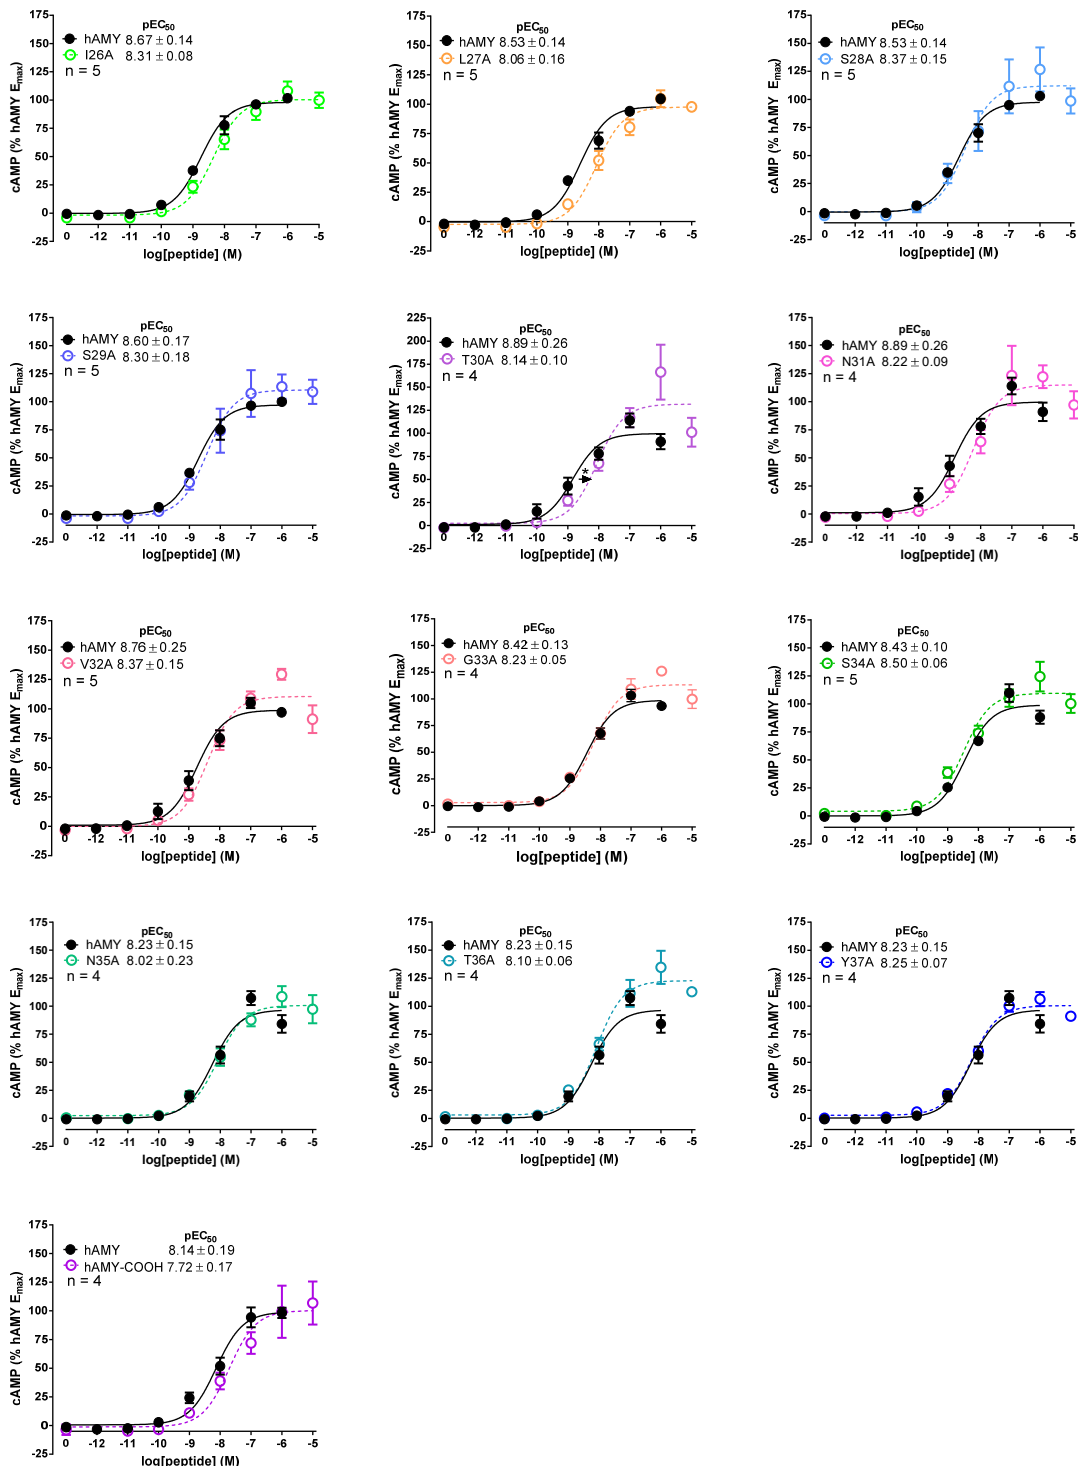

**Figure SB4. C-terminal Alanine Analogues: hAMY<sub>1(a)</sub>**

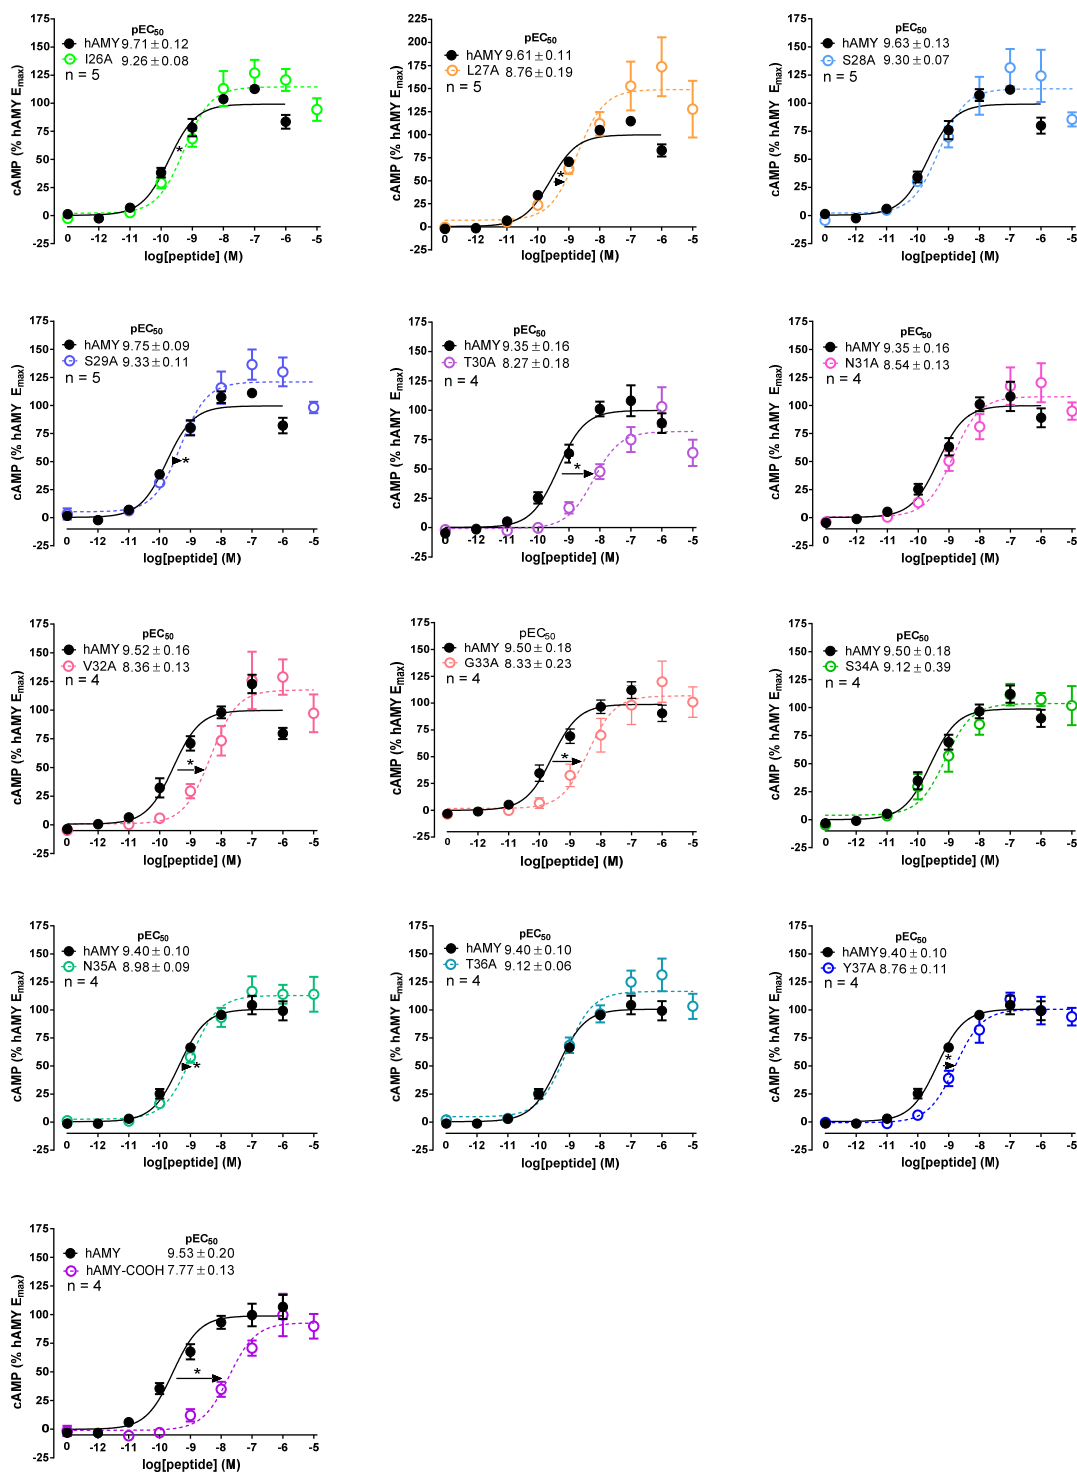

Figure SB5. C-terminal Analogues hAMY<sub>3(a)</sub>

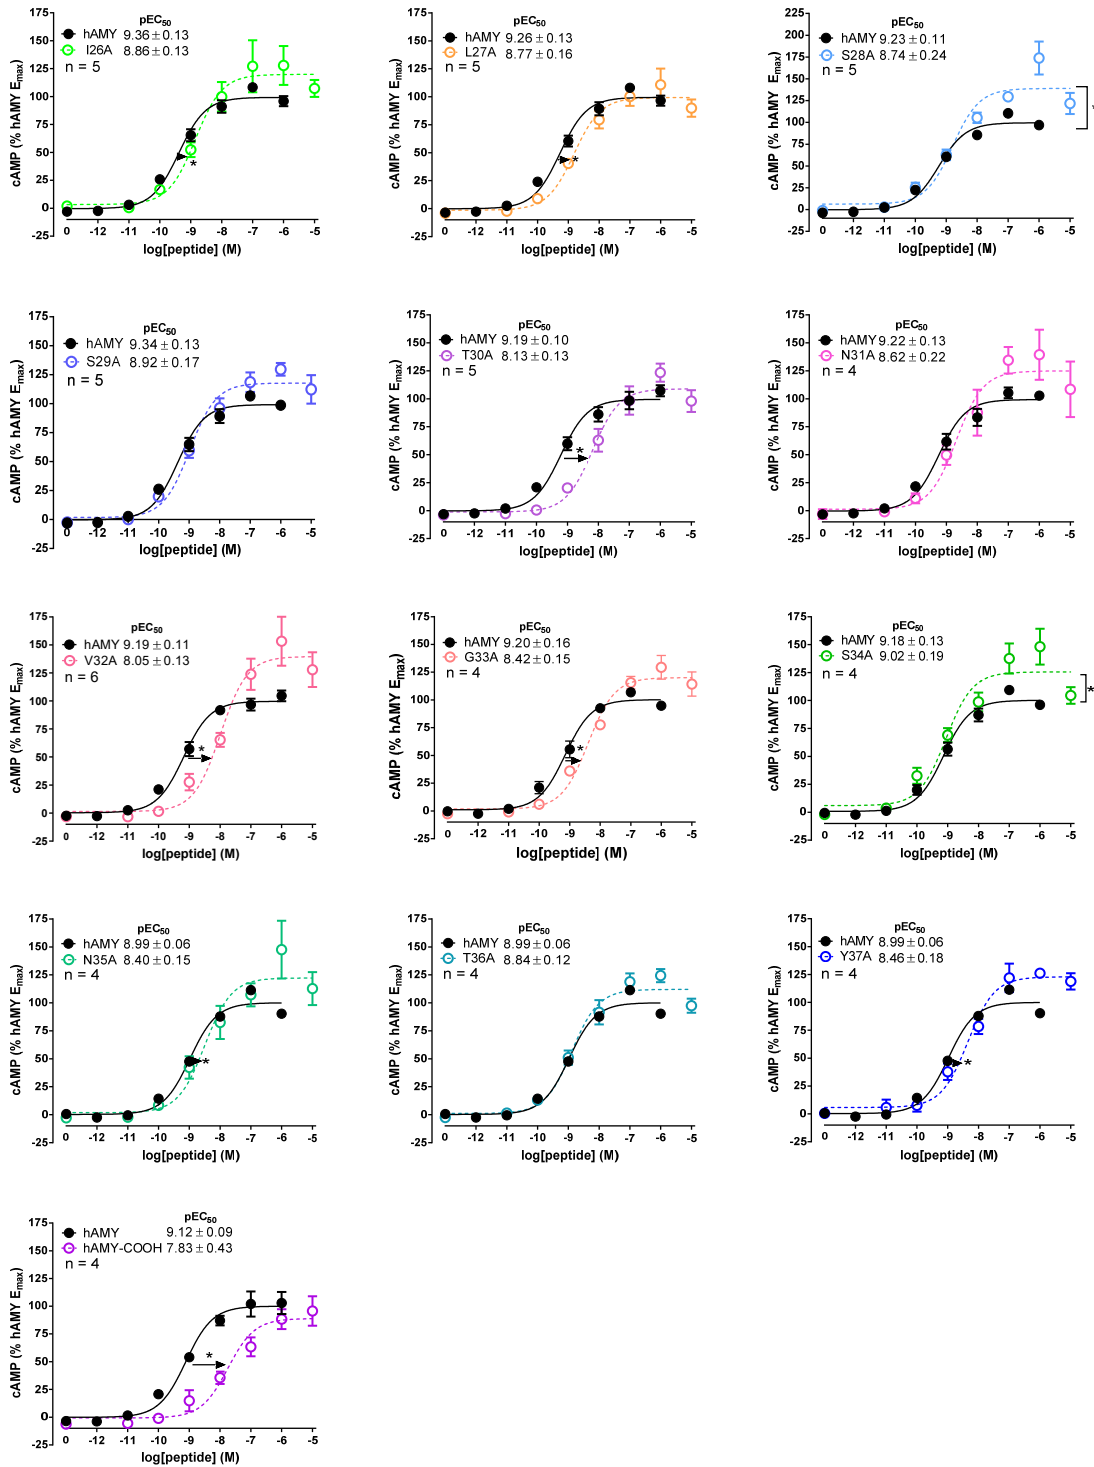

Figure SB6. Binding C-terminal Analogues: AMY<sub>1(a)</sub>

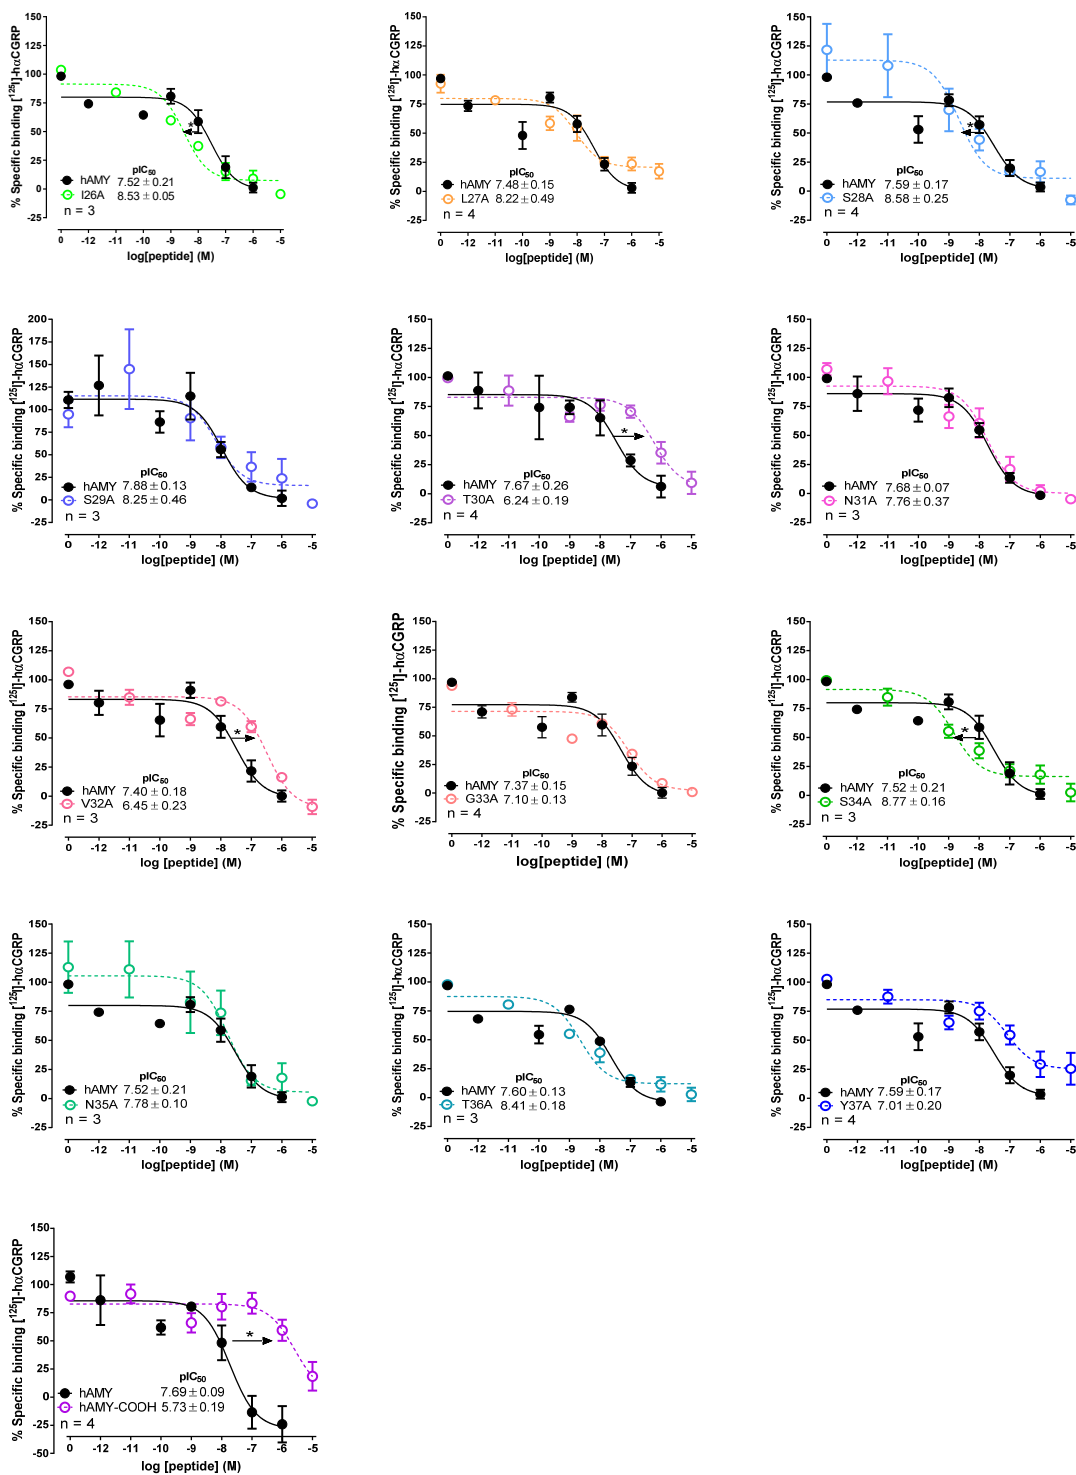

**Figure SB7. C-terminal Exchange Between CGRP and Amylin: Y37F hAMY**

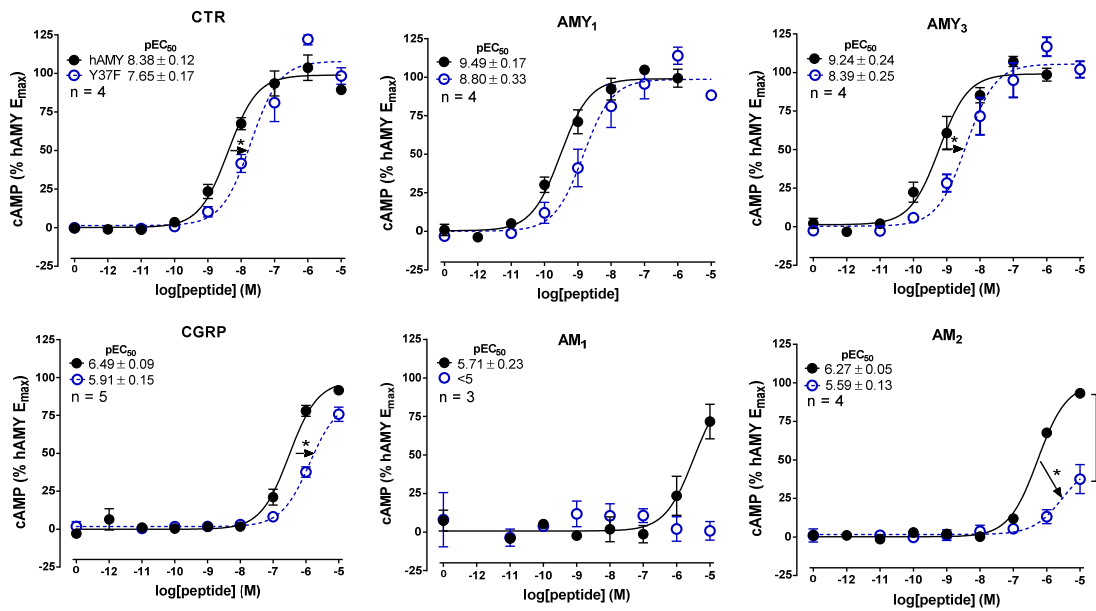

**Figure SB8. C-terminal Exchange Between CGRP and Amylin: F37Y CGRP**

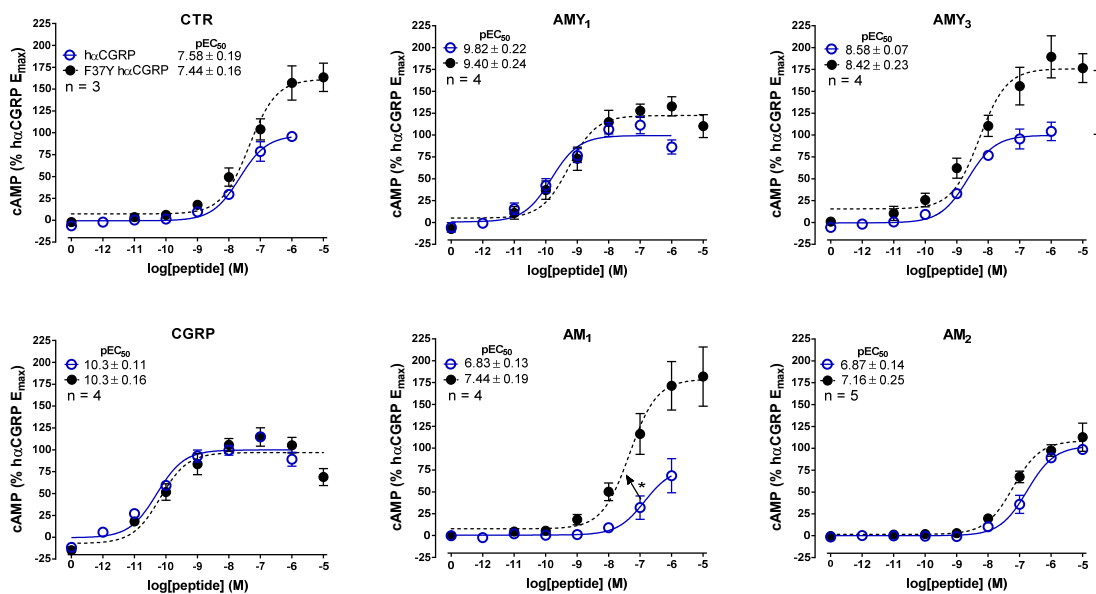



**Figure SB9.** C-terminal Exchange Between human calcitonin and amylin: P32Y hCT, Y37P hAMY. a) cAMP production and b) Binding for hAMY and Y37P hAMY or hCT and P32Y hCT at the AMY<sub>1</sub> receptor.

a

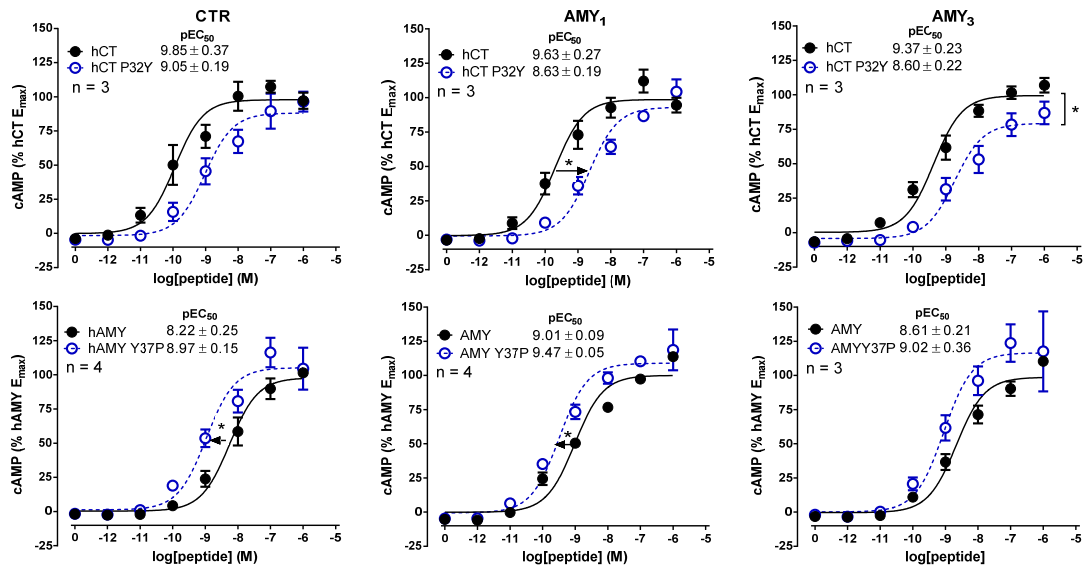

b

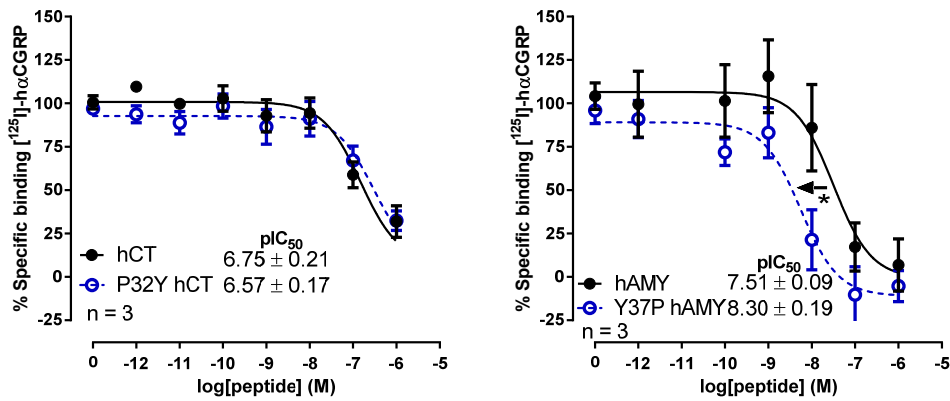

**Figure SB10.** N-terminal Loop Analogues hCT<sub>(a)</sub>. DR, second synthesis of this peptide in DR laboratory.

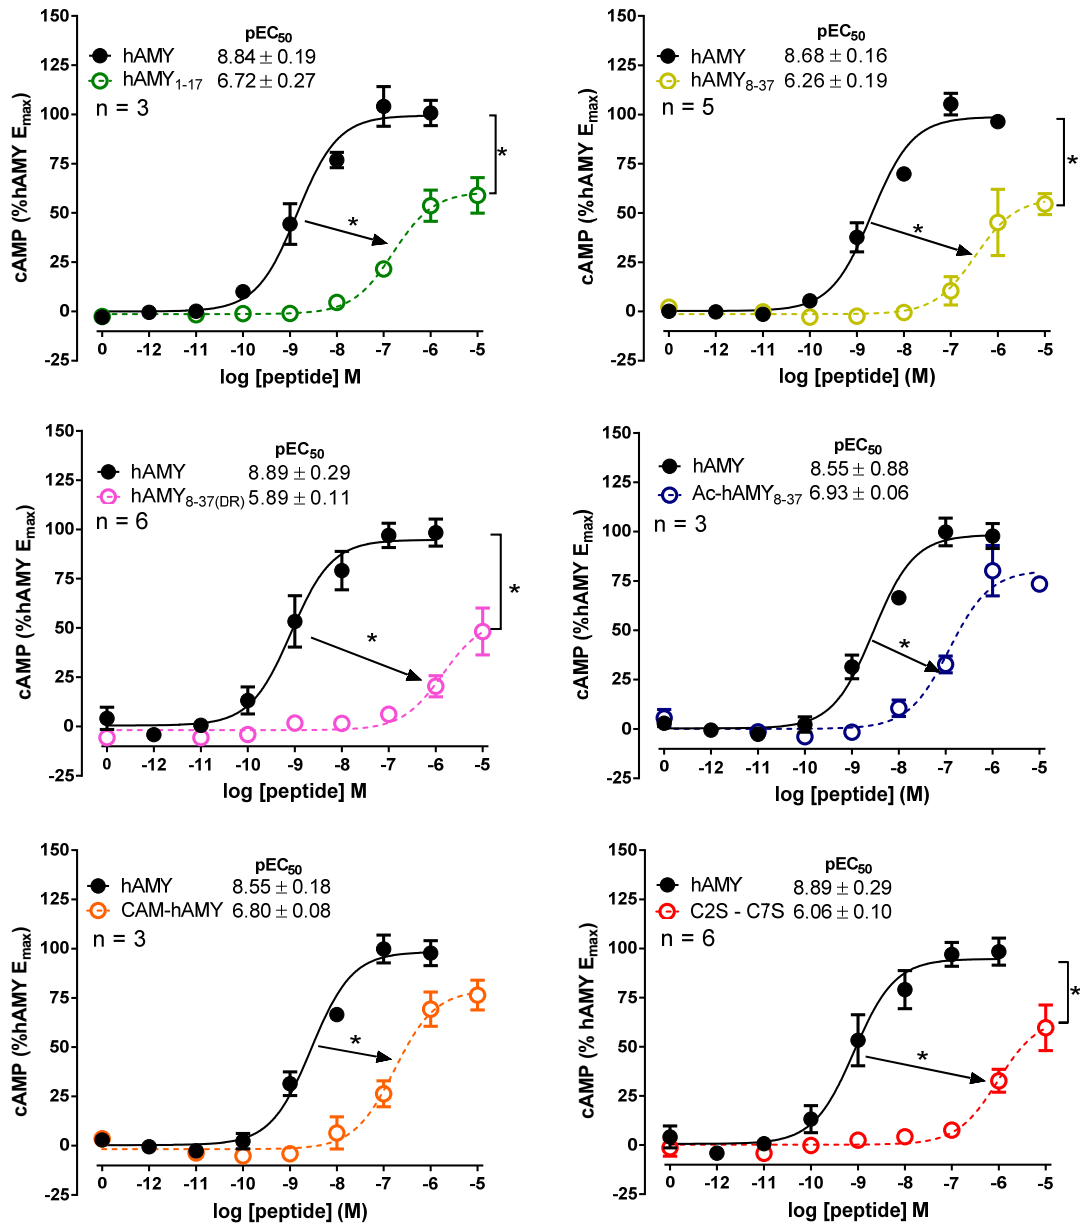

Figure SB11. N-terminal Loop Analogues: hAMY<sub>1(a)</sub>

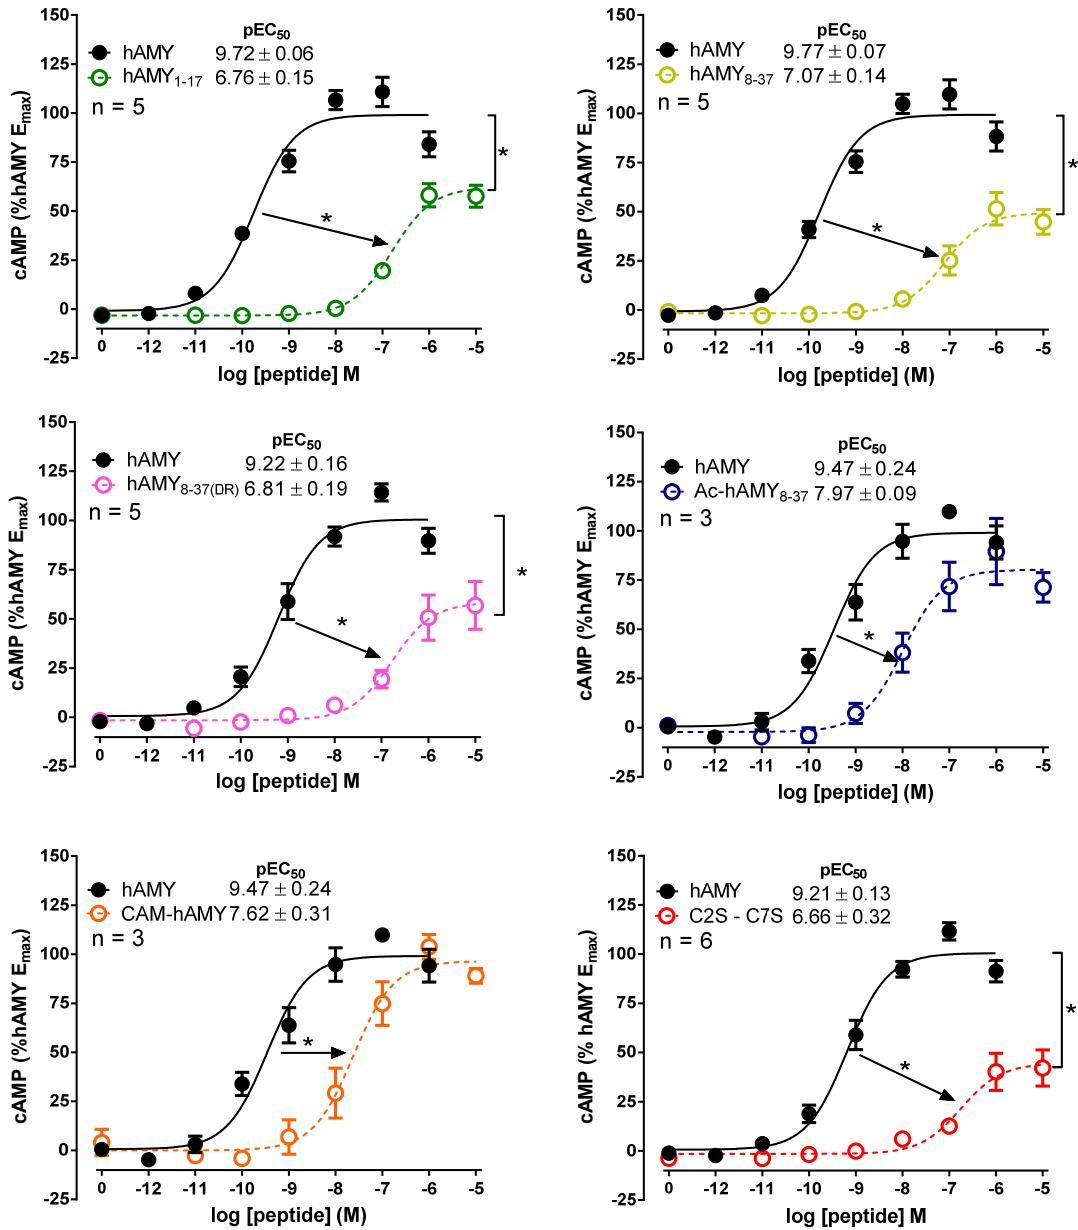

**Figure SB12.** N-terminal Loop Analogues: hAMY<sub>3(a)</sub>

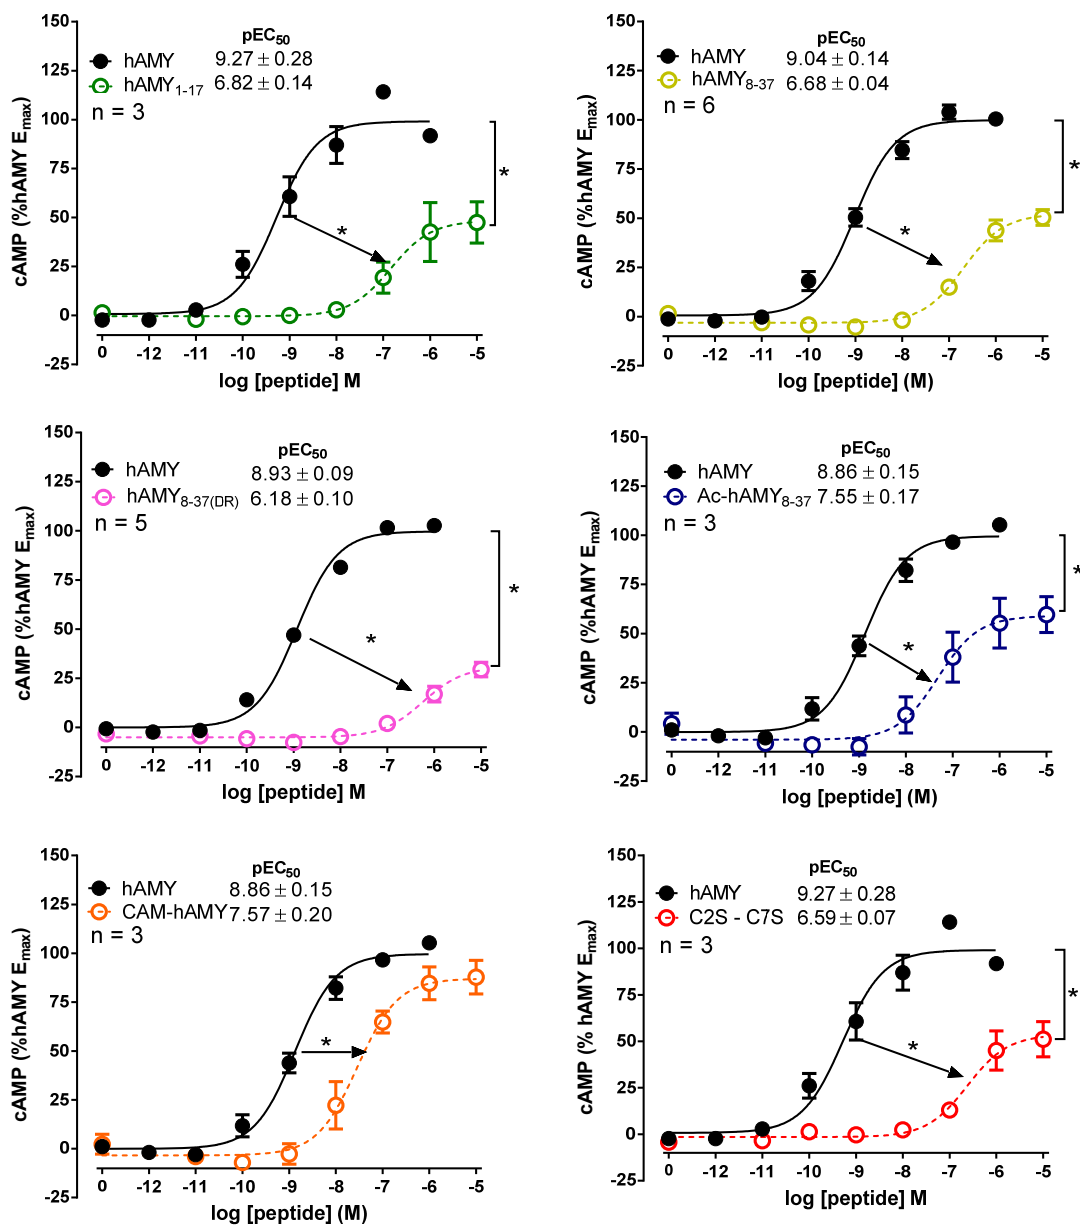

**Figure SB13.** N-terminal Alanine/Glycine Analogues: hCT<sub>(a)</sub>

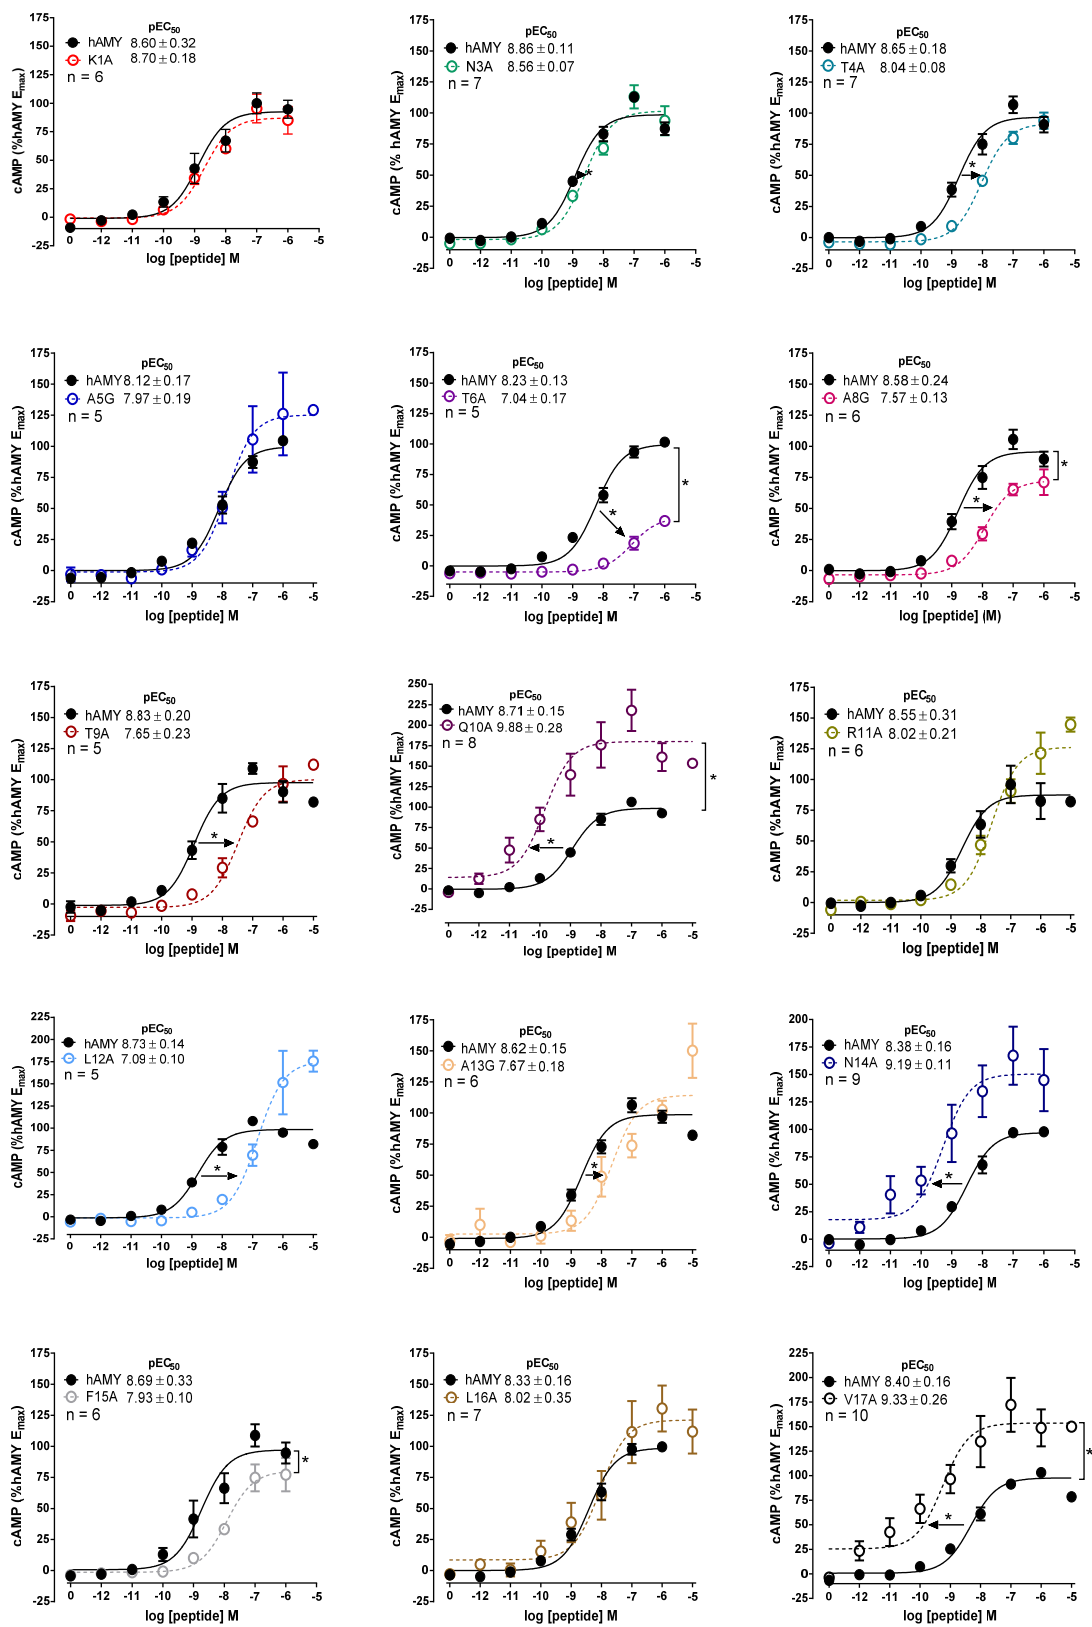

**Figure SB14.** *N*-terminal Alanine/Glycine Analogues: hAMY<sub>1(a)</sub>

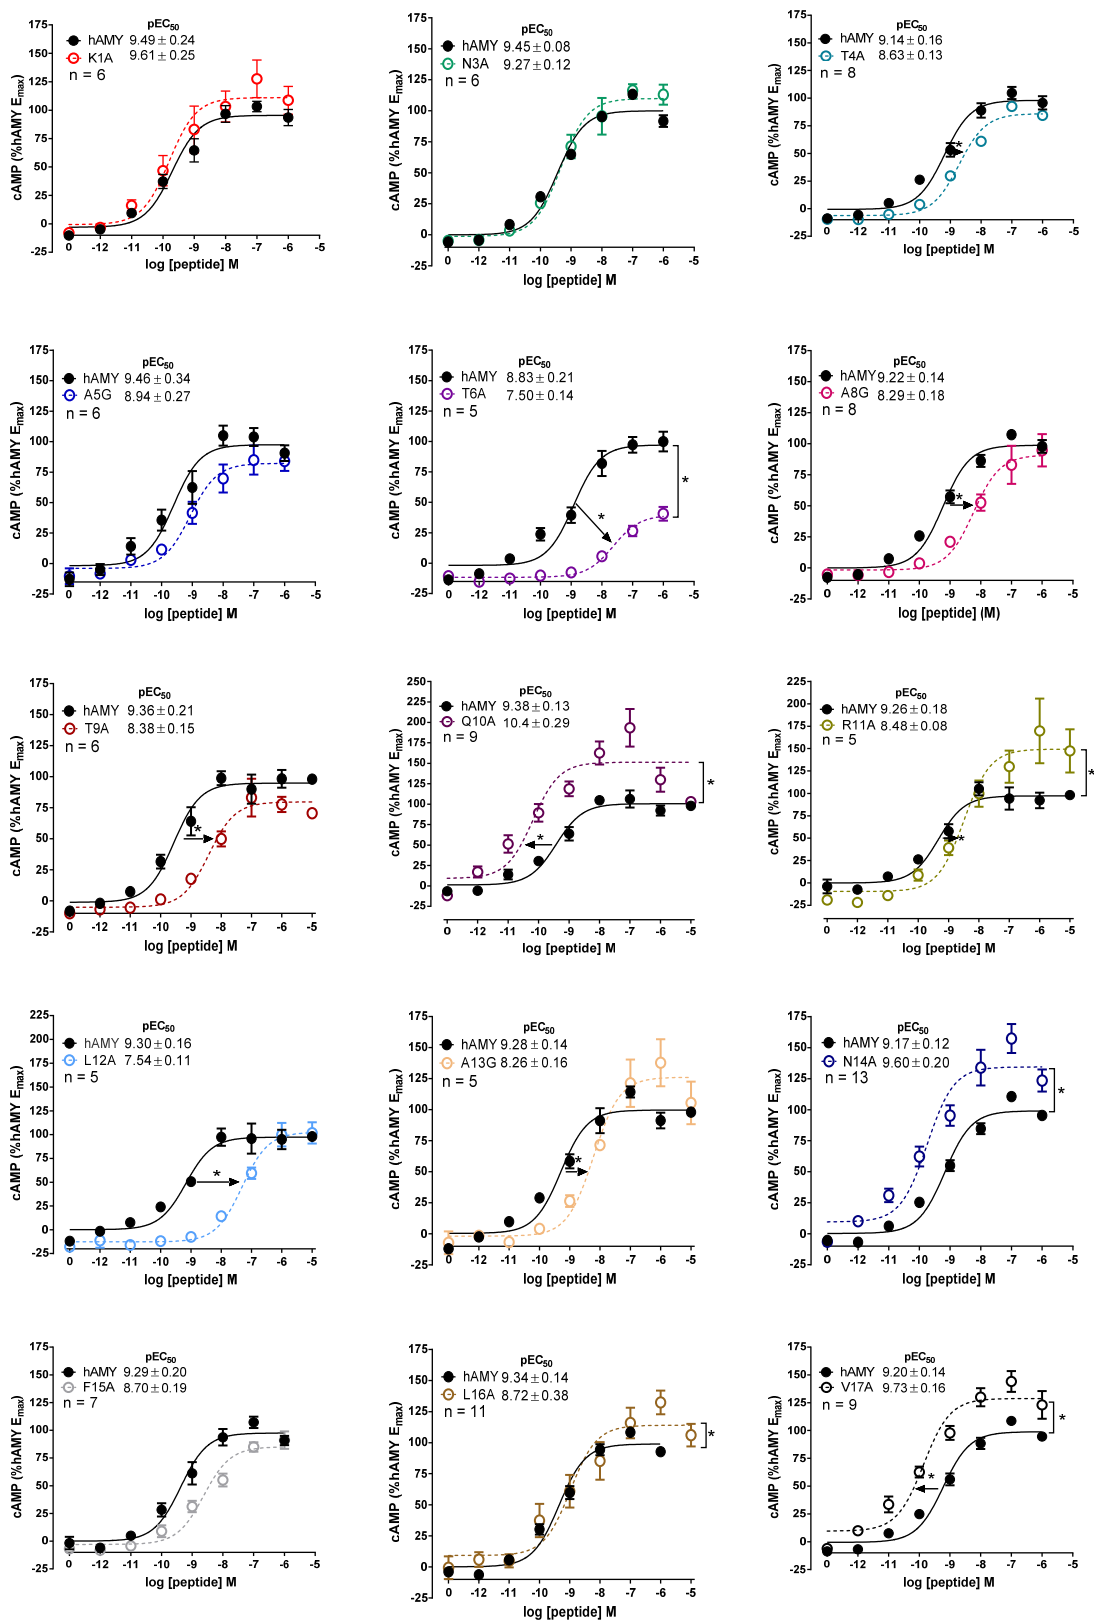

**Figure SB15.** N-terminal Alanine/Glycine Analogues: hAMY<sub>3(a)</sub>

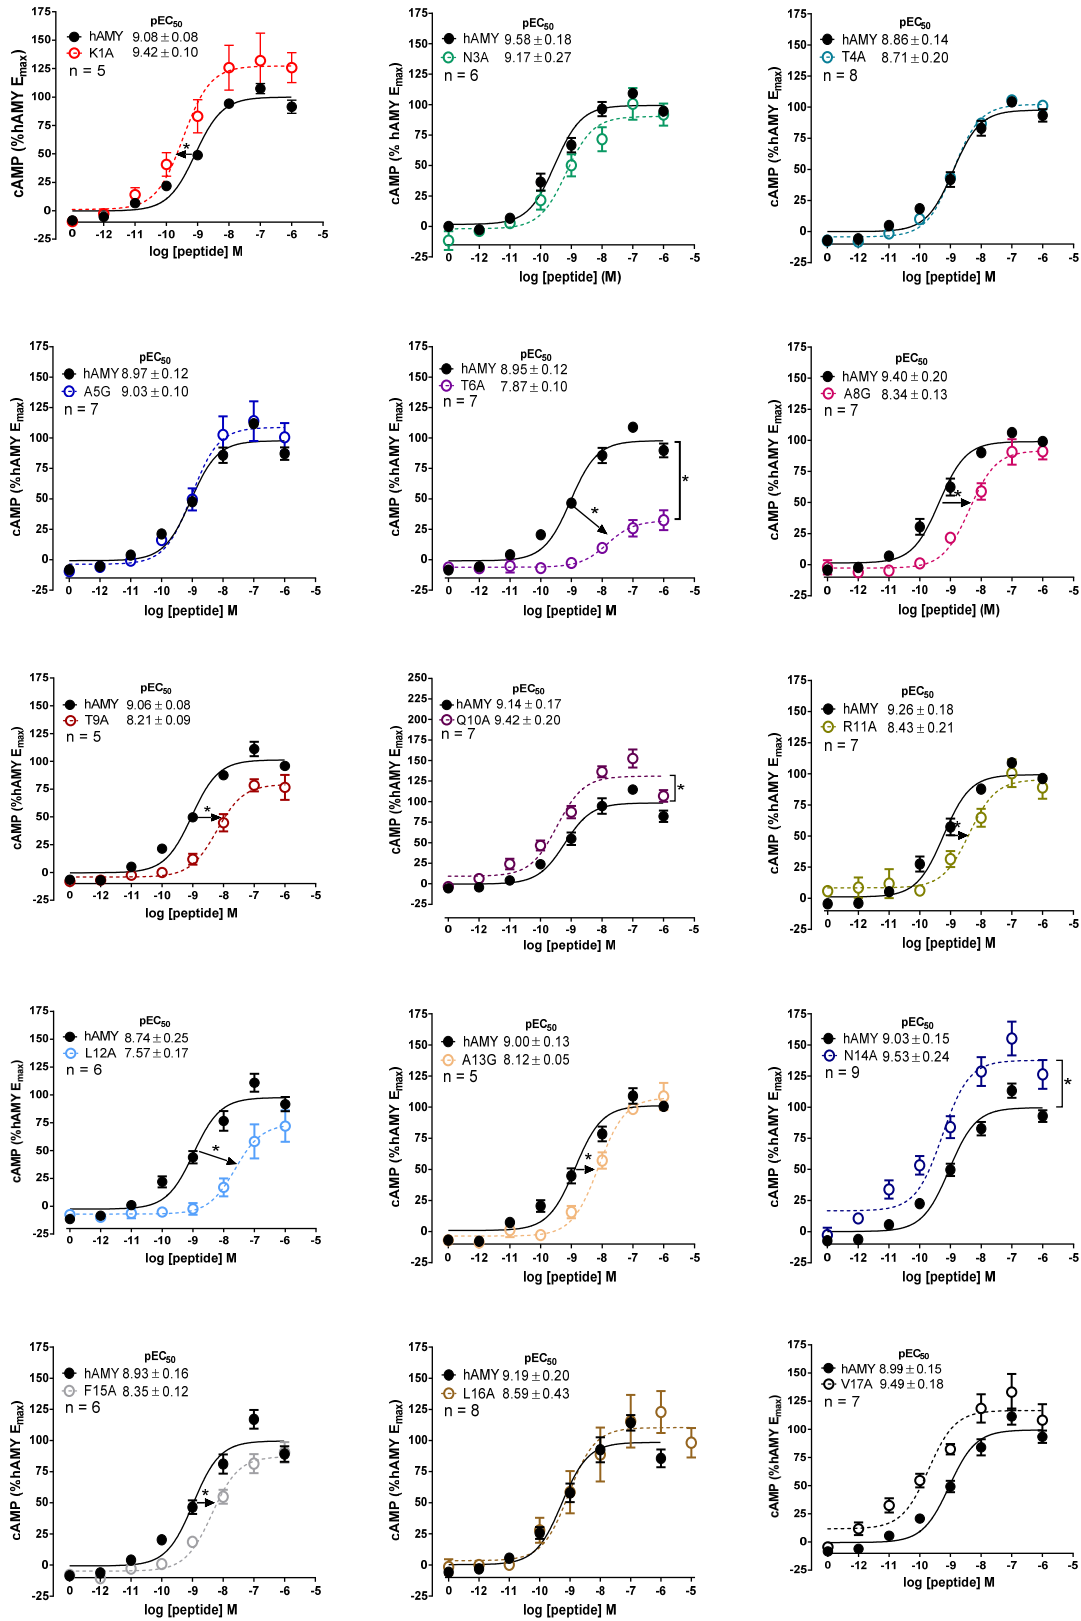

**Figure SB16.** Binding *N*-terminal Alanine/Glycine Analogues, AMY<sub>8-37</sub>: AMY<sub>1(a)</sub>

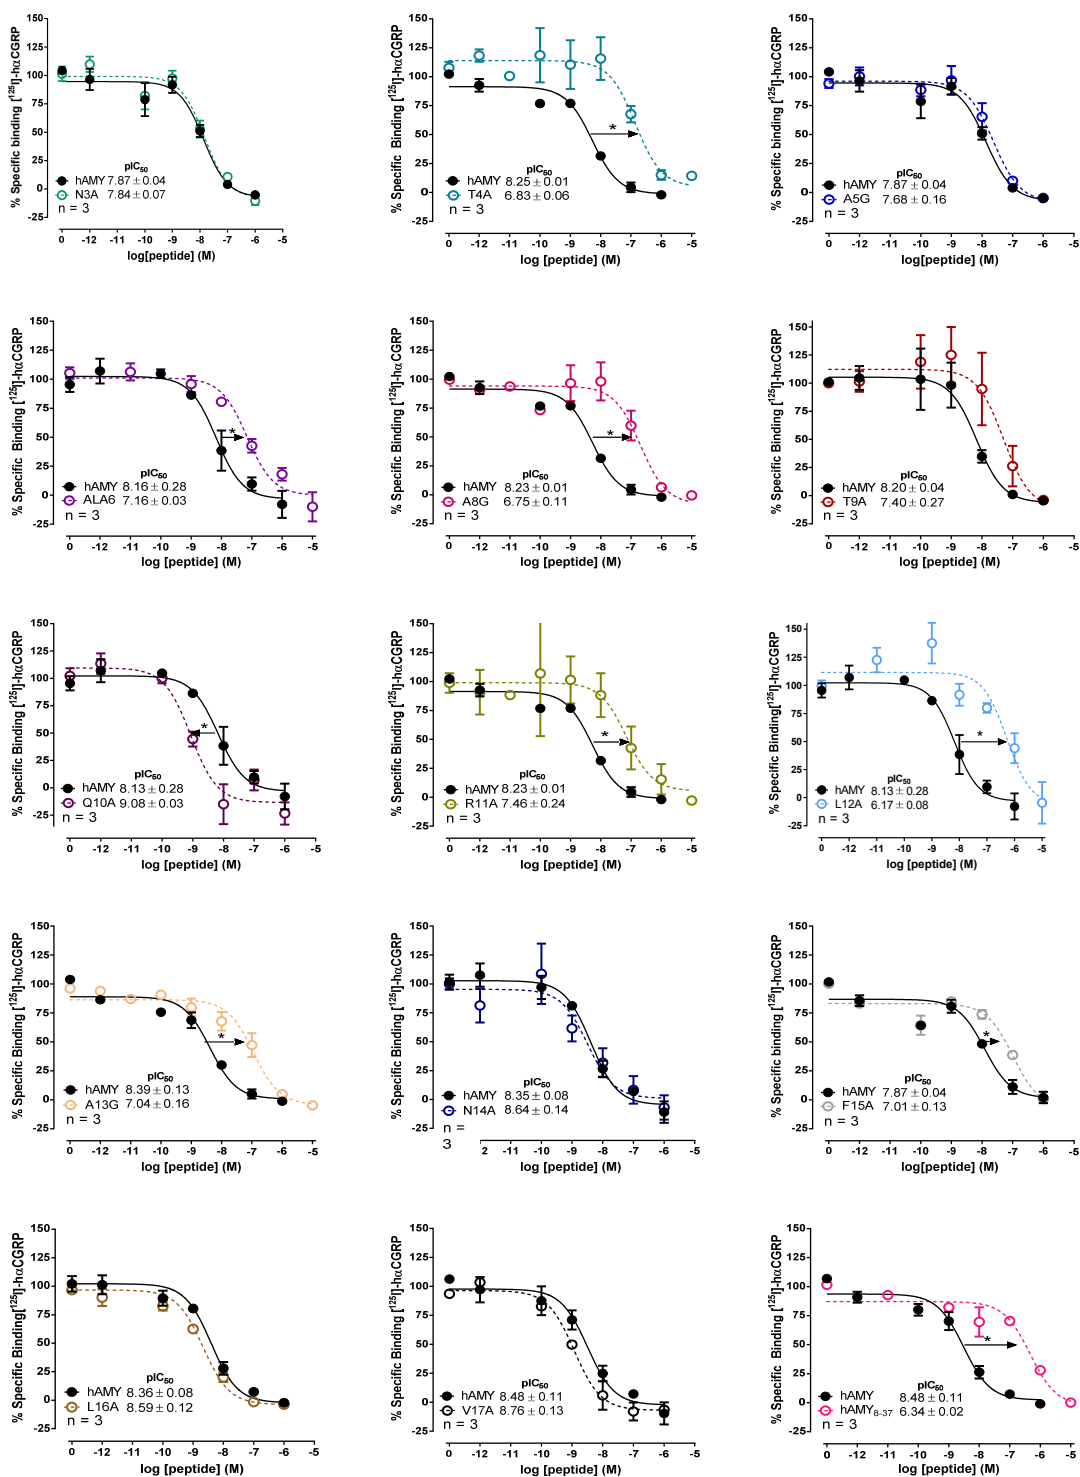



**Figure SB17.** Alanine to Serine Substitution: Position 5

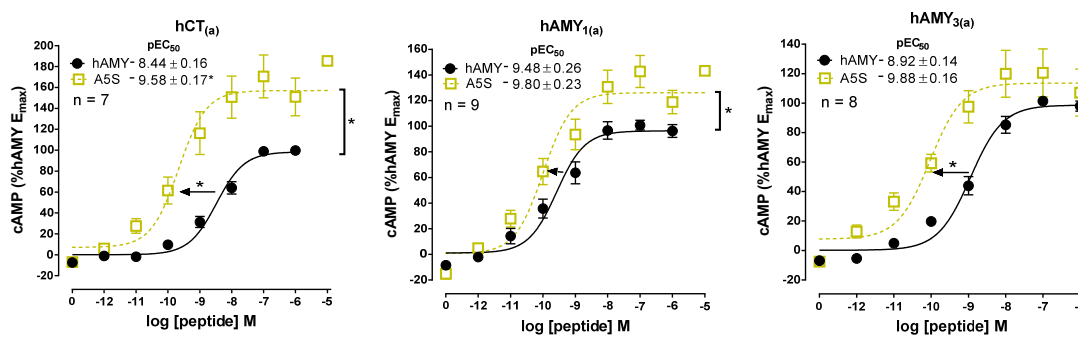

**Figure SB18.** Predicted helical propensity of selected peptides at 5 or 25°C, pH 7.4, and an ionic strength of .14 M

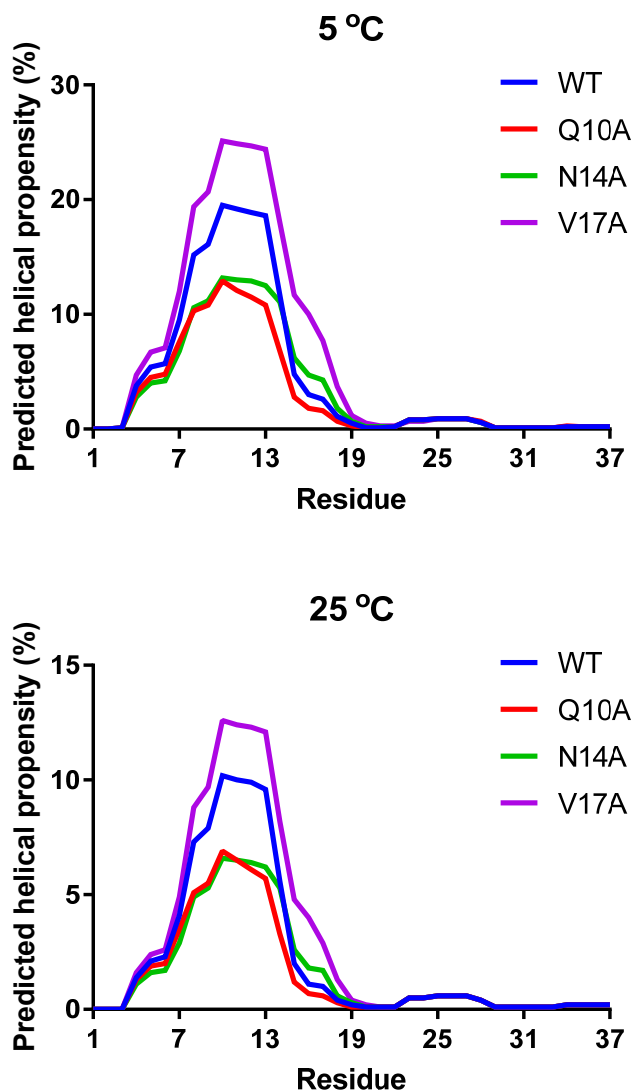

### Supplementary data tables 5-7

Data are mean  $\pm$  s.e.m. of  $n$  biological replicates, reporting cAMP production for three different receptors by peptide analogues. Data were normalized to hAMY in each experiment and  $E_{\max}$  values are % hAMY, or pramlintide for the relevant analogue. For Table SB6, binding data are also shown. \* $P < 0.05$  by unpaired  $t$ -test for  $pEC_{50}$  and  $pIC_{50}$  or where 95% confidence intervals did not include 100 for  $E_{\max}$ . Statistically significant increases or decreases are shaded as indicated. ND, not done.

**Table SB5.** Analogues CT<sub>(a)</sub>.

|          | decrease   |      | increase    |            |      |    |
|----------|------------|------|-------------|------------|------|----|
|          | $pEC_{50}$ | SEM  | Fold change | $E_{\max}$ | SEM  | n  |
| hAMY     | 8.60       | 0.32 |             | 100        |      |    |
| K1A      | 8.70       | 0.18 | 1.3         | 89.3       | 10.8 | 6  |
| hAMY     | 8.86       | 0.11 |             | 100        |      |    |
| N3A      | 8.56*      | 0.07 | -2.0        | 103        | 8.65 | 7  |
| hAMY     | 8.65       | 0.18 |             | 100        |      |    |
| T4A      | 8.04*      | 0.08 | -4.1        | 92.3       | 6.45 | 7  |
| hAMY     | 8.12       | 0.17 |             | 100        |      |    |
| A5G      | 7.97       | 0.19 | -1.4        | 118        | 28.7 | 5  |
| hAMY     | 8.23       | 0.13 |             | 100        |      |    |
| T6A      | 7.04*      | 0.17 | -16         | 41.8*      | 3.64 | 5  |
| hAMY     | 8.58       | 0.24 |             | 100        |      |    |
| A8G      | 7.57*      | 0.13 | -10         | 79.2*      | 6.27 | 6  |
| hAMY     | 8.83       | 0.20 |             | 100        |      |    |
| T9A      | 7.65*      | 0.23 | -15         | 98.9       | 13.3 | 5  |
| hAMY     | 8.71       | 0.15 |             | 100        |      |    |
| Q10A     | 9.88*      | 0.28 | 15          | 169*       | 18.5 | 8  |
| hAMY     | 8.55       | 0.31 |             | 100        |      |    |
| R11A     | 8.02       | 0.50 | -3.4        | 113        | 14.0 | 6  |
| hAMY     | 8.73       | 0.14 |             | 100        |      |    |
| L12A     | 7.09*      | 0.10 | -44         | 151        | 28.4 | 5  |
| hAMY     | 8.62       | 0.15 |             | 100        |      |    |
| A13G     | 7.67*      | 0.18 | -7.3        | 134        | 26.6 | 6  |
| hAMY     | 8.38       | 0.16 |             | 100        |      |    |
| N14A     | 9.19*      | 0.11 | 6.5         | 146        | 25.5 | 9  |
| hAMY     | 8.69       | 0.33 |             | 100        |      |    |
| F15A     | 7.93       | 0.10 | -5.7        | 74.1*      | 7.31 | 6  |
| hAMY     | 8.33       | 0.16 |             | 100        |      |    |
| L16A     | 8.02       | 0.35 | -2.0        | 119        | 14.7 | 7  |
| hAMY     | 8.40       | 0.16 |             | 100        |      |    |
| V17A     | 9.33*      | 0.26 | 8.5         | 164*       | 26.7 | 10 |
| hAMY     | 8.67       | 0.14 |             | 100        |      |    |
| I26A     | 8.31       | 0.08 | -2.3        | 101        | 6.12 | 5  |
| hAMY     | 8.53       | 0.14 |             | 100        |      |    |
| L27A     | 8.06       | 0.16 | -3.0        | 98.7       | 5.31 | 5  |
| hAMY     | 8.53       | 0.14 |             | 100        |      |    |
| S28A     | 8.37       | 0.15 | -1.5        | 113        | 17.7 | 5  |
| hAMY     | 8.60       | 0.17 |             | 100        |      |    |
| S29A     | 8.30       | 0.18 | -2.0        | 102        | 5.92 | 5  |
| hAMY     | 8.89       | 0.26 |             | 100        |      |    |
| T30A     | 8.14*      | 0.10 | -5.6        | 132        | 19.4 | 4  |
| hAMY     | 8.89       | 0.26 |             | 100        |      |    |
| N31A     | 8.22*      | 0.09 | -4.7        | 114        | 14.7 | 4  |
| hAMY     | 8.76       | 0.25 |             | 100        |      |    |
| V32A     | 8.37       | 0.15 | -2.5        | 112        | 5.08 | 5  |
| hAMY     | 8.42       | 0.13 |             | 100        |      |    |
| G33A     | 8.23       | 0.05 | -1.6        | 113        | 5.55 | 4  |
| hAMY     | 8.43       | 0.10 |             | 100        |      |    |
| S34A     | 8.50       | 0.06 | 1.2         | 109        | 7.57 | 5  |
| hAMY     | 8.23       | 0.15 |             | 100        |      |    |
| N35A     | 8.02       | 0.23 | -1.6        | 107        | 12.2 | 4  |
| hAMY     | 8.23       | 0.15 |             | 100        |      |    |
| T36A     | 8.10       | 0.06 | -1.4        | 123        | 9.20 | 4  |
| hAMY     | 8.23       | 0.15 |             | 100        |      |    |
| Y37A     | 8.25       | 0.07 | 1.1         | 101        | 3.36 | 4  |
| hAMY     | 8.84       | 0.19 |             | 100        |      |    |
| hAMY1-17 | 6.72*      | 0.27 | -13         | 65*        | 6.27 | 3  |

|             | pEC <sub>50</sub> | SEM  | Fold change | E <sub>max</sub> | SEM  | n |
|-------------|-------------------|------|-------------|------------------|------|---|
| hAMY        | 8.68              | 0.16 |             | 100              |      |   |
| hAMY8-37    | 6.26*             | 0.19 | -260        | 64.3*            | 7.70 | 5 |
| hAMY        | 8.55              | 0.18 |             | 100              |      |   |
| hAMYAc8-37  | 6.93*             | 0.06 | -42         | 80.2             | 6.13 | 3 |
| hAMY        | 8.89              | 0.29 |             | 100              |      |   |
| C2S-C7S     | 6.06*             | 0.10 | -680        | 65.5*            | 13.3 | 6 |
| hAMY        | 8.55              | 0.18 |             | 100              |      |   |
| CAM         | 6.80*             | 0.08 | -56         | 81.2             | 4.7  | 3 |
| hAMY        | 8.44              | 0.16 |             | 100              |      |   |
| A5S         | 9.58*             | 0.17 | 14          | 157*             | 18   | 7 |
| hAMY        | 8.14              | 0.19 |             | 100              |      |   |
| hAMY-COOH   | 7.72              | 0.17 | -2.6        | 102              | 20.9 | 4 |
| Pramlintide | 8.82              | 0.23 |             | 100              |      |   |
| PramQ10A    | 9.29              | 0.16 | 2.9         | 139              | 20.1 | 6 |

**Table SB6.** Analogues AMY<sub>1(a)</sub>

| decrease |                   |      | increase    |                  |      |    |                   |      |             |   |
|----------|-------------------|------|-------------|------------------|------|----|-------------------|------|-------------|---|
|          | pEC <sub>50</sub> | SEM  | Fold change | E <sub>max</sub> | SEM  | n  | pIC <sub>50</sub> | SEM  | Fold change | n |
| hAMY     | 9.49              | 0.24 |             | 100              |      |    |                   |      |             |   |
| K1A      | 9.61              | 0.25 | 1.3         | 113              | 14.8 | 6  |                   |      | ND          |   |
| hAMY     | 9.45              | 0.08 |             | 100              |      |    | 7.87              | 0.04 |             |   |
| N3A      | 9.27              | 0.12 | -1.5        | 111              | 7.25 | 6  | 7.84              | 0.07 | -1.1        | 3 |
| hAMY     | 9.14              | 0.16 |             | 100              |      |    | 8.25              | 0.01 |             |   |
| T4A      | 8.63*             | 0.13 | -3.2        | 87.6             | 5.59 | 8  | 6.83*             | 0.06 | -26         | 3 |
| hAMY     | 9.46              | 0.34 |             | 100              |      |    | 7.87              | 0.04 |             |   |
| A5G      | 8.94              | 0.27 | -3.3        | 84.8             | 7.64 | 6  | 7.68              | 0.16 | -1.5        | 3 |
| hAMY     | 8.83              | 0.21 |             | 100              |      |    | 8.16              | 0.28 |             |   |
| T6A      | 7.50*             | 0.15 | -21         | 41.6*            | 5.89 | 5  | 7.16*             | 0.07 | -10         | 3 |
| hAMY     | 9.22              | 0.14 |             | 100              |      |    | 8.23              | 0.01 |             |   |
| A8G      | 8.29*             | 0.18 | -8.5        | 96.2             | 13.8 | 8  | 6.75*             | 0.11 | -30         | 3 |
| hAMY     | 9.36              | 0.21 |             | 100              |      |    | 8.20              | 0.04 |             |   |
| T9A      | 8.38*             | 0.15 | -9.5        | 90.7             | 11.8 | 6  | 7.40*             | 0.27 | -6          | 3 |
| hAMY     | 9.38              | 0.13 |             | 100              |      |    | 8.13              | 0.28 |             |   |
| Q10A     | 10.4*             | 0.29 | 10.5        | 154*             | 15.2 | 9  | 9.08*             | 0.03 | 9           | 3 |
| hAMY     | 9.26              | 0.17 |             | 100              |      |    | 8.23              | 0.01 |             |   |
| R11A     | 8.48*             | 0.15 | -6.0        | 150*             | 17.4 | 5  | 7.46*             | 0.24 | -6          | 3 |
| hAMY     | 9.30              | 0.16 |             | 100              |      |    | 8.13              | 0.28 |             |   |
| L12A     | 7.54*             | 0.12 | -58         | 97.4             | 6.57 | 5  | 6.17*             | 0.08 | -91         | 3 |
| hAMY     | 9.28              | 0.14 |             | 100              |      |    | 8.39              | 0.13 |             |   |
| A13G     | 8.26*             | 0.16 | -11         | 133              | 21.8 | 5  | 7.04*             | 0.16 | -22         | 3 |
| hAMY     | 9.17              | 0.12 |             | 100              |      |    | 8.35              | 0.08 |             |   |
| N14A     | 9.60              | 0.2  | 2.7         | 142*             | 9.31 | 13 | 8.64              | 0.14 | 2           | 3 |
| hAMY     | 9.29              | 0.2  |             | 100              |      |    | 7.87              | 0.04 |             |   |
| F15A     | 8.70              | 0.19 | -3.9        | 86.1             | 6.03 | 7  | 7.01*             | 0.13 | -7.2        | 3 |
| hAMY     | 9.34              | 0.14 |             | 100              |      |    | 8.36              | 0.08 |             |   |
| L16A     | 8.72              | 0.38 | -4.2        | 126*             | 8.28 | 11 | 8.59              | 0.12 | 1.7         | 3 |
| hAMY     | 9.20              | 0.14 |             | 100              |      |    | 8.48              | 0.11 |             |   |
| V17A     | 9.73*             | 0.16 | 3.4         | 139*             | 9.1  | 9  | 8.76              | 0.13 | 2           | 3 |
| hAMY     | 9.71              | 0.12 |             | 100              |      |    | 7.52              | 0.21 |             |   |
| I26A     | 9.26*             | 0.08 | -2.8        | 115              | 9.3  | 5  | 8.53*             | 0.05 | 10.2        | 3 |
| hAMY     | 9.61              | 0.11 |             | 100              |      |    | 7.48              | 0.15 |             |   |
| L27A     | 8.76*             | 0.19 | -7.1        | 153              | 29.6 | 5  | 8.22              | 0.49 | 5.5         | 4 |
| hAMY     | 9.63              | 0.13 |             | 100              |      |    | 7.59              | 0.17 |             |   |
| S28A     | 9.30              | 0.07 | -2.1        | 113              | 15   | 5  | 8.58*             | 0.25 | 9.8         | 4 |
| hAMY     | 9.75              | 0.09 |             | 100              |      |    | 7.88              | 0.13 |             |   |
| S29A     | 9.33*             | 0.1  | -2.6        | 121              | 9.53 | 5  | 8.25              | 0.46 | 2.3         | 3 |

|              | pEC <sub>50</sub> | SEM  | Fold change | E <sub>max</sub> | SEM  | n | pIC <sub>50</sub> | SEM  | Fold change | n |
|--------------|-------------------|------|-------------|------------------|------|---|-------------------|------|-------------|---|
| hAMY         | 9.35              | 0.16 |             | 100              |      |   | 7.67              | 0.26 |             |   |
| T30A         | 8.27*             | 0.18 | -12         | 82.1             | 12.8 | 4 | 6.24*             | 0.19 | -27         | 4 |
| hAMY         | 9.35              | 0.16 |             | 100              |      |   | 7.68              | 0.07 |             |   |
| N31A         | 8.84*             | 0.13 | -3.2        | 108              | 11.9 | 4 | 7.76              | 0.37 | -1.2        | 3 |
| hAMY         | 9.52              | 0.16 |             | 100              |      |   | 7.40              | 0.18 |             |   |
| V32A         | 8.36*             | 0.13 | -15         | 117              | 17.9 | 4 | 6.45*             | 0.23 | -8.9        | 3 |
| hAMY         | 9.50              | 0.18 |             | 100              |      |   | 7.37              | 0.15 |             |   |
| G33A         | 8.33*             | 0.23 | -15         | 107              | 12.5 | 4 | 7.10              | 0.13 | -1.9        | 3 |
| hAMY         | 9.50              | 0.18 |             | 100              |      |   | 7.52              | 0.21 |             |   |
| S34A         | 9.12              | 0.39 | -2.4        | 108              | 11.5 | 4 | 8.77*             | 0.16 | -18         | 3 |
| hAMY         | 9.40              | 0.1  |             | 100              |      |   | 7.52              | 0.21 |             |   |
| N35A         | 8.98*             | 0.09 | -2.6        | 112              | 8.61 | 4 | 7.78              | 0.10 | -1.8        | 3 |
| hAMY         | 9.40              | 0.1  |             | 100              |      |   | 7.60              | 0.13 |             |   |
| T36A         | 9.12              | 0.06 | -1.9        | 116              | 7.82 | 4 | 8.41              | 0.18 | 6.5         | 3 |
| hAMY         | 9.40              | 0.1  |             | 100              |      |   | 7.59              | 0.17 |             |   |
| Y37A         | 8.76*             | 0.11 | -4.4        | 101              | 8.58 | 4 | 7.01              | 0.20 | -3.8        | 3 |
| hAMY         | 9.72              | 0.06 |             | 100              |      |   |                   |      | ND          |   |
| hAMY1-17     | 6.76*             | 0.15 | -910        | 68.2*            | 5.34 | 5 |                   |      |             |   |
| hAMY         | 9.77              | 0.07 |             | 100              |      |   | 8.48              | 0.11 |             |   |
| hAMY8-37     | 7.07*             | 0.14 | -500        | 51.6*            | 6.44 | 5 | 6.34*             | 0.02 | -138        | 3 |
| hAMY         | 9.21              | 0.13 |             | 100              |      |   |                   |      | ND          |   |
| hAMY8-37(DR) | 6.81*             | 0.19 | -250        | 53.5*            | 12.4 | 6 |                   |      |             |   |
| hAMY         | 9.47              | 0.24 |             | 100              |      |   |                   |      | ND          |   |
| hAMYAc8-37   | 7.97*             | 0.09 | -32         | 82.8             | 10.4 | 3 |                   |      |             |   |
| hAMY         | 9.21              | 0.13 |             | 100              |      |   | 8.34              | 0.09 |             |   |
| C2S-C7S      | 6.66*             | 0.32 | -360        | 49.5*            | 9.09 | 6 | 5.74*             | 0.05 | -398        | 3 |
| hAMY         | 9.47              | 0.24 |             | 100              |      |   |                   |      | ND          |   |
| CAM          | 7.62*             | 0.31 | -71         | 100              | 1.42 | 3 |                   |      |             |   |
| hAMY         | 9.48              | 0.26 |             | 100              |      |   |                   |      | ND          |   |
| A5S          | 9.80              | 0.23 | 2.1         | 128*             | 8.8  | 9 |                   |      |             |   |
| hAMY         | 9.53              | 0.2  |             | 100              |      |   | 7.69              | 0.09 |             |   |
| hAMY-COOH    | 7.77*             | 0.13 | -58         | 93.5             | 13   | 4 | 5.73*             | 0.19 | -91         | 4 |
| Pramlintide  | 9.74              | 0.13 |             | 100              |      |   | 8.54              | 0.12 |             |   |
| PramQ10A     | 9.46              | 0.19 | -1.9        | 129*             | 9.84 | 7 | 8.96              | 0.09 | 2.6         | 3 |

**Table SB7. Analogues AMY<sub>3(a)</sub>**

| decrease   |                   | increase |             |                  |      |   |
|------------|-------------------|----------|-------------|------------------|------|---|
|            | pEC <sub>50</sub> | SEM      | Fold change | E <sub>max</sub> | SEM  | n |
| hAMY       | 9.08              | 0.08     |             | 100              |      |   |
| K1A        | 9.42*             | 0.10     | -2.2        | 128              | 16.8 | 5 |
| hAMY       | 9.58              | 0.18     |             | 100              |      |   |
| N3A        | 9.17              | 0.27     | -2.6        | 88.8             | 7.59 | 6 |
| hAMY       | 8.86              | 0.14     |             | 100              |      |   |
| T4A        | 8.71              | 0.20     | -1.4        | 107              | 16.4 | 8 |
| hAMY       | 8.97              | 0.12     |             | 100              |      |   |
| A5G        | 9.03              | 0.10     | -1.2        | 109              | 14.5 | 7 |
| hAMY       | 8.95              | 0.12     |             | 100              |      |   |
| T6A        | 7.87*             | 0.10     | -12         | 43.2*            | 11.2 | 7 |
| hAMY       | 9.40              | 0.20     |             | 100              |      |   |
| A8G        | 8.34*             | 0.13     | -12         | 92.3             | 5.44 | 7 |
| hAMY       | 9.06              | 0.08     |             | 100              |      |   |
| T9A        | 8.21*             | 0.09     | -7.1        | 79.5             | 7.90 | 5 |
| hAMY       | 9.14              | 0.17     |             | 100              |      |   |
| Q10A       | 9.42              | 0.20     | 1.9         | 134*             | 5.89 | 7 |
| hAMY       | 9.26              | 0.18     |             | 100              |      |   |
| R11A       | 8.43*             | 0.20     | -6.8        | 96.4             | 8.71 | 7 |
| hAMY       | 8.74              | 0.25     |             | 100              |      |   |
| L12A       | 7.57*             | 0.17     | -15         | 77.3             | 15   | 6 |
| hAMY       | 9.00              | 0.13     |             | 100              |      |   |
| A13G       | 8.12*             | 0.05     | -7.6        | 108              | 7.04 | 5 |
| hAMY       | 9.03              | 0.15     |             | 100              |      |   |
| N14A       | 9.53              | 0.24     | 3.2         | 136*             | 11.6 | 9 |
| hAMY       | 8.93              | 0.16     |             | 100              |      |   |
| F15A       | 8.35*             | 0.12     | -3.8        | 87.6             | 6.93 | 6 |
| hAMY       | 9.19              | 0.20     |             | 100              |      |   |
| L16A       | 8.59              | 0.43     | -4.0        | 122              | 12.7 | 8 |
| hAMY       | 8.99              | 0.15     |             | 100              |      |   |
| V17A       | 9.49              | 0.18     | 3.2         | 121              | 13.2 | 7 |
| hAMY       | 9.36              | 0.13     |             | 100              |      |   |
| I26A       | 8.86*             | 0.13     | -3.2        | 121              | 16.0 | 5 |
| hAMY       | 9.26              | 0.13     |             | 100              |      |   |
| L27A       | 8.77*             | 0.16     | -3.1        | 101              | 8.24 | 5 |
| hAMY       | 9.23              | 0.11     |             | 100              |      |   |
| S28A       | 8.74              | 0.24     | -3.1        | 142*             | 9.09 | 5 |
| hAMY       | 9.34              | 0.13     |             | 100              |      |   |
| S29A       | 8.92              | 0.17     | -2.6        | 119*             | 7.94 | 5 |
| hAMY       | 9.19              | 0.10     |             | 100              |      |   |
| T30A       | 8.13*             | 0.13     | -12         | 110              | 6.97 | 5 |
| hAMY       | 9.22              | 0.13     |             | 100              |      |   |
| N31A       | 8.62              | 0.22     | -4.0        | 126              | 19.3 | 4 |
| hAMY       | 9.19              | 0.11     |             | 100              |      |   |
| V32A       | 8.05*             | 0.13     | -13         | 139              | 18.3 | 6 |
| hAMY       | 9.20              | 0.16     |             | 100              |      |   |
| G33A       | 8.42*             | 0.18     | -6.0        | 120*             | 8.03 | 4 |
| hAMY       | 9.18              | 0.13     |             | 100              |      |   |
| S34A       | 9.02              | 0.19     | -1.4        | 126*             | 8.73 | 5 |
| hAMY       | 8.99              | 0.06     |             | 100              |      |   |
| N35A       | 8.40*             | 0.15     | -3.9        | 124              | 16.0 | 4 |
| hAMY       | 8.99              | 0.06     |             | 100              |      |   |
| T36A       | 8.84              | 0.12     | -1.4        | 112*             | 5.09 | 4 |
| hAMY       | 8.99              | 0.06     |             | 100              |      |   |
| Y37A       | 8.46*             | 0.18     | -3.4        | 122              | 7.31 | 4 |
| hAMY       | 9.27              | 0.28     |             | 100              |      |   |
| hAMY1-17   | 6.82*             | 0.14     | -280        | 49.3*            | 11.2 | 3 |
| hAMY       | 9.04              | 0.14     |             | 100              |      |   |
| hAMY8-37   | 6.68*             | 0.04     | -230        | 55.5*            | 5.20 | 6 |
| hAMY       | 8.86              | 0.15     |             | 100              |      |   |
| hAMYAc8-37 | 7.55*             | 0.17     | -20         | 71.7*            | 4.09 | 3 |
| hAMY       | 9.27              | 0.28     |             | 100              |      |   |
| C2S-C7S    | 6.59*             | 0.07     | -480        | 55.5*            | 9.90 | 3 |
| hAMY       | 8.86              | 0.15     |             | 100              |      |   |
| CAM        | 7.57*             | 0.20     | -20         | 91               | 6.88 | 3 |
| hAMY       | 8.92              | 0.14     |             | 100              |      |   |
| A5S        | 9.88*             | 0.16     | 9.1         | 125              | 20.4 | 8 |

|                    | pEC <sub>50</sub> | SEM  | Fold change | E <sub>max</sub> | SEM  | n |
|--------------------|-------------------|------|-------------|------------------|------|---|
| <b>hAMY</b>        | 9.12              | 0.09 |             | 100              |      |   |
| <b>hAMY-COOH</b>   | 7.83*             | 0.43 | -20         | 90.5             | 11.8 | 4 |
| <b>Pramlintide</b> | 9.75              | 0.19 |             | 100              |      |   |
| <b>PramQ10A</b>    | 9.89              | 0.20 | 1.4         | 129*             | 11.4 | 7 |

**Table SB8.** C-terminal exchange peptides. Data are mean  $\pm$  s.e.m. of *n* biological replicates, reporting the effect of C-terminal residue exchange at different receptors. Data were normalized to the relevant control in each experiment. \**P* < 0.05 by unpaired *t*-test for pEC<sub>50</sub> or where 95% confidence intervals did not include 100 for E<sub>max</sub>. Statistically significant increases or decreases are shaded as indicated.

|                                  | decrease          |       |             | increase         |       |      | hAMY and hαCGRP C-terminal exchange |             |             |                  |      |       |      |
|----------------------------------|-------------------|-------|-------------|------------------|-------|------|-------------------------------------|-------------|-------------|------------------|------|-------|------|
| Receptor                         | pEC <sub>50</sub> | SEM   | Fold change | E <sub>max</sub> | SEM   | n    | pEC <sub>50</sub>                   | SEM         | Fold change | E <sub>max</sub> | SEM  | n     |      |
| CT                               | hAMY              | 8.38  | 0.12        |                  | 100   |      | hαCGRP                              | 7.58        | 0.19        |                  | 100  |       |      |
|                                  | Y37F              | 7.65* | 0.17        | -5.4             | 110   | 4.5  | 3                                   | hαCGRP F37Y | 7.44        | 0.16             | -1.4 | 160   | 15.2 |
| AMY <sub>1(a)</sub>              | hAMY              | 9.49  | 0.17        |                  | 100   |      | hαCGRP                              | 9.82        | 0.22        |                  | 100  |       |      |
|                                  | Y37F              | 8.80  | 0.33        | -4.9             | 101   | 3.8  | 4                                   | hαCGRP F37Y | 9.40        | 0.24             | -2.6 | 123   | 9.9  |
| AMY <sub>3(a)</sub>              | hAMY              | 9.24  | 0.24        |                  | 100   |      | hαCGRP                              | 8.58        | 0.07        |                  | 100  |       |      |
|                                  | Y37F              | 8.39* | 0.25        | -7.1             | 107   | 4.0  | 4                                   | hαCGRP F37Y | 8.42        | 0.23             | -1.4 | 175*  | 16.4 |
| CGRP                             | hAMY              | 6.49  | 0.09        |                  | 100   |      | hαCGRP                              | 10.29       | 0.11        |                  | 100  |       |      |
|                                  | Y37F              | 5.91  | 0.15        | -3.8             | 92.5  | 10.1 | 5                                   | hαCGRP F37Y | 10.27       | 0.16             | -1.0 | 96.5  | 8.3  |
| AM <sub>1</sub>                  | hAMY              | <5    |             |                  |       |      | hαCGRP                              | 6.83        | 0.13        |                  | 100  |       |      |
|                                  | Y37F              | <5    |             |                  |       | 3    | hαCGRP F37Y                         | 7.44*       | 0.19        | 4.0              | 180  | 30.5  | 4    |
| AM <sub>2</sub>                  | hAMY              | 6.27  | 0.05        |                  | 100   |      | hαCGRP                              | 6.87        | 0.14        |                  | 100  |       |      |
|                                  | Y37F              | 5.59* | 0.13        | -4.8             | 48.9* | 12.8 | 4                                   | hαCGRP F37Y | 7.16        | 0.25             | 1.9  | 119   | 20.6 |
| hAMY and hCT C-terminal exchange |                   |       |             |                  |       |      |                                     |             |             |                  |      |       |      |
| Receptor                         | pEC <sub>50</sub> | SEM   | Fold change | E <sub>max</sub> | SEM   | n    | pEC <sub>50</sub>                   | SEM         | Fold change | E <sub>max</sub> | SEM  | n     |      |
| CT                               | hAMY              | 8.22  | 0.25        |                  | 100   |      | hCT                                 | 9.85        | 0.37        |                  | 100  |       |      |
|                                  | Y37P              | 8.97* | 0.15        | 5.6              | 106   | 11.3 | 4                                   | hCT P32Y    | 9.05        | 0.19             | -6.3 | 87.4  | 9.2  |
| AMY <sub>1(a)</sub>              | hAMY              | 9.01  | 0.09        |                  | 100   |      | hCT                                 | 9.63        | 0.27        |                  | 100  |       |      |
|                                  | Y37P              | 9.47* | 0.05        | 2.9              | 109   | 6.8  | 4                                   | hCT P32Y    | 8.63*       | 0.19             | -10  | 94.0  | 4.5  |
| AMY <sub>3(a)</sub>              | hAMY              | 8.61  | 0.21        |                  | 100   |      | hCT                                 | 9.37        | 0.23        |                  | 100  |       |      |
|                                  | Y37P              | 9.02  | 0.36        | 2.6              | 120   | 18.6 | 3                                   | hCT P32Y    | 8.60        | 0.22             | -5.9 | 81.3* | 5.4  |



**Figure SB19.** Specificity of anti-CTR antibody 188/10 and expression of CTR in brainstem cultures. HEK293S cells were plated into 96-well plates then transiently transfected with (a) vector only, (b) rat CTR, (c) rat CTR/rat RAMP1 or (d) CTR expression was determined in rat brainstem cultures. Cells were blocked with goat serum, then incubated with 188/10 rabbit polyclonal antibody against rat CTR (4°C overnight, 1:500 dilution) in (a)-(d) or monoclonal antibody 9B4 against CTR (4°C overnight, 1:100) in (d) only, as indicated. The secondary antibodies used were goat anti-rabbit AlexaFluor568 or goat anti-mouse Alexa Fluor 594 (Life Technologies, 1:200). Images were taken using a PerkinElmer Operetta imaging system using the 20x high numerical aperture lens. HEK293S images shown in (a)-(c) are representative of three independent experiments performed in duplicate wells. Brainstem culture images in (d) are representative of duplicate wells from one experiment, which was repeated with two (188/10) or three (9B4) other independently prepared brainstem cultures with a similar staining pattern. Scale bar shown in (a)-(c) 50  $\mu$ m. DAPI is blue, antibody staining is orange.

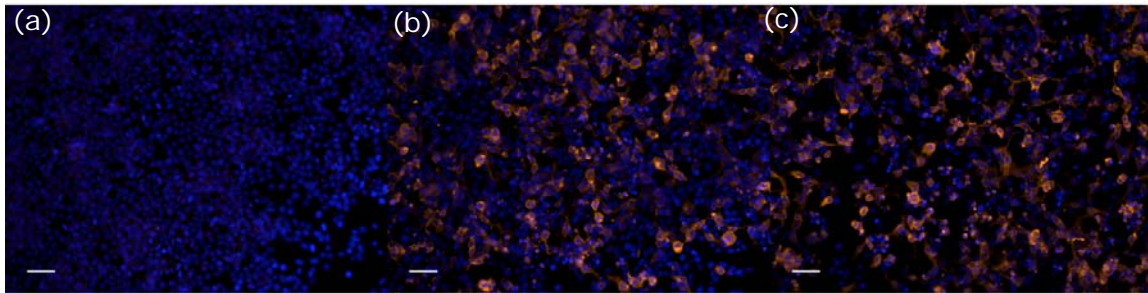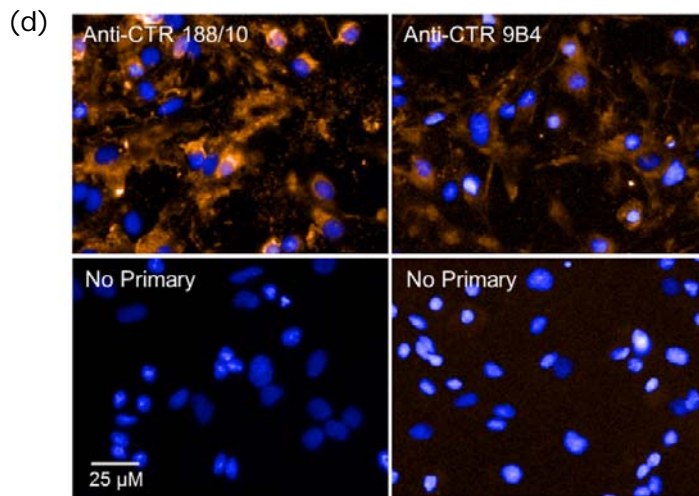

**Figure SB20.** Activation of four different signaling pathways at three different receptors by Q10A hAMY. Data are mean  $\pm$  s.e.m. of  $n$  biological replicates. Data were normalized to hAMY in each experiment. \* $P < 0.05$  by unpaired  $t$ -test for  $pEC_{50}$  or where 95% confidence intervals did not include 100 for  $E_{max}$ .

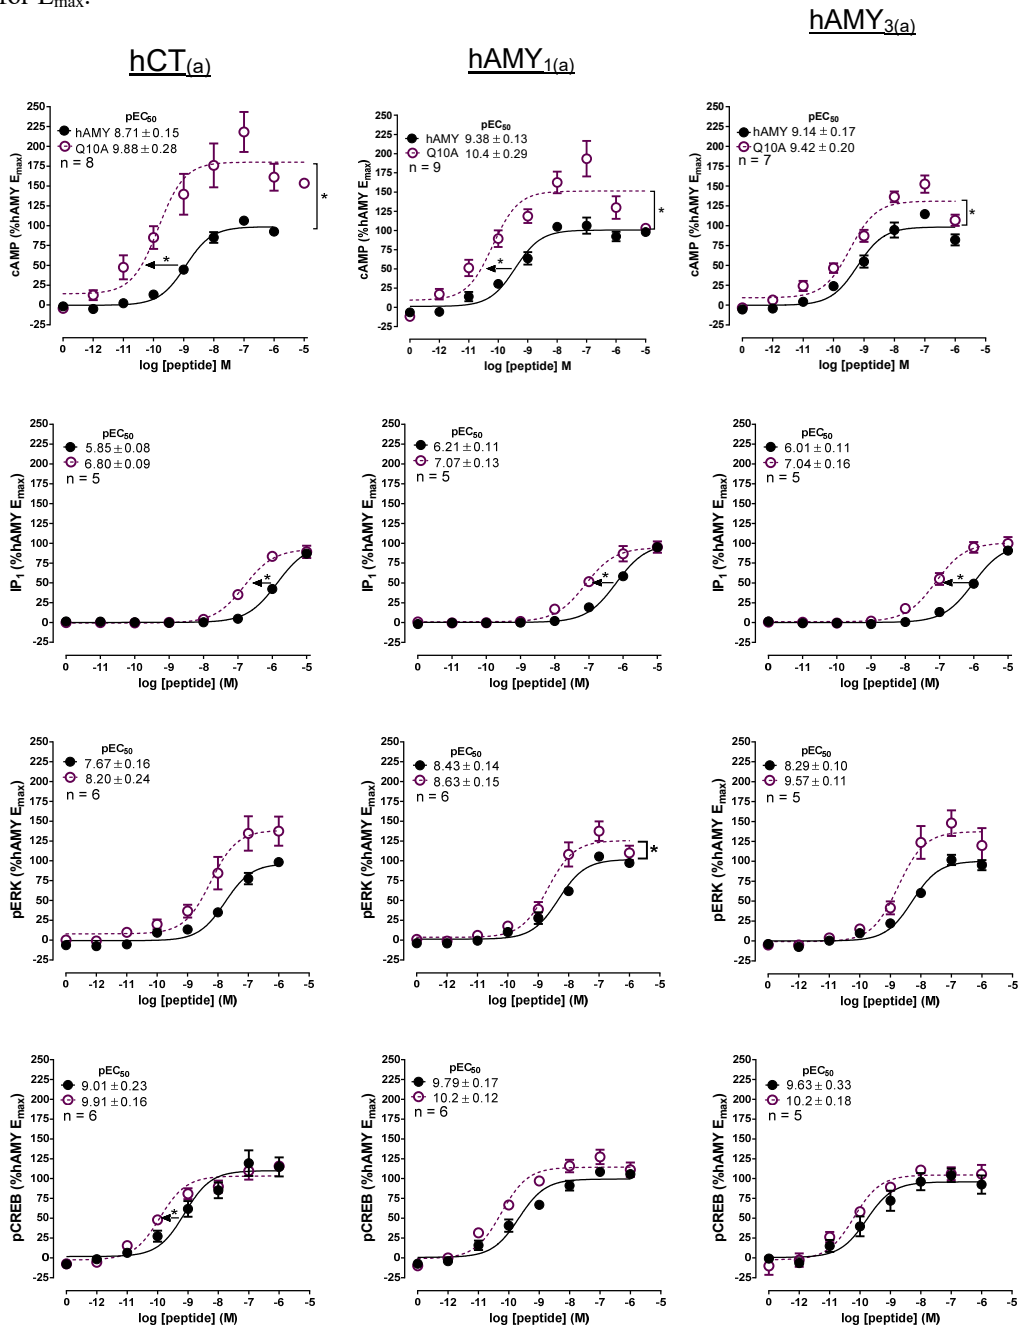

**Figure SB21.** Radial plots summarizing the analysis of ligand bias for hAMY, T6A, Q10A and V17A with four different signaling pathways (cAMP, IP<sub>1</sub>, ERK1/2 and CREB phosphorylation) at four different receptors (CTR, AMY<sub>1-3</sub>). (A) The relative effectiveness of the analogues compared to the reference ligand (hAMY) are expressed as  $\Delta\text{Log}(\tau/K_A)$ . (B) Signaling bias of the analogues compared to the reference pathway (cAMP) are expressed as  $\Delta\Delta\text{Log}(\tau/K_A)$ . T6A did not induce detectable activation of IP<sub>1</sub> accumulation and therefore could not be analyzed. Data points are the mean of 3-22 biological replicates. The control peptide (hAMY) was compared to the analogue by one-way ANOVA with a post-hoc Dunnett's test; \* $P < 0.05$  hAMY vs. T6A; # $P < 0.05$  hAMY vs. Q10A; ^ $P < 0.05$  hAMY vs. V17A.

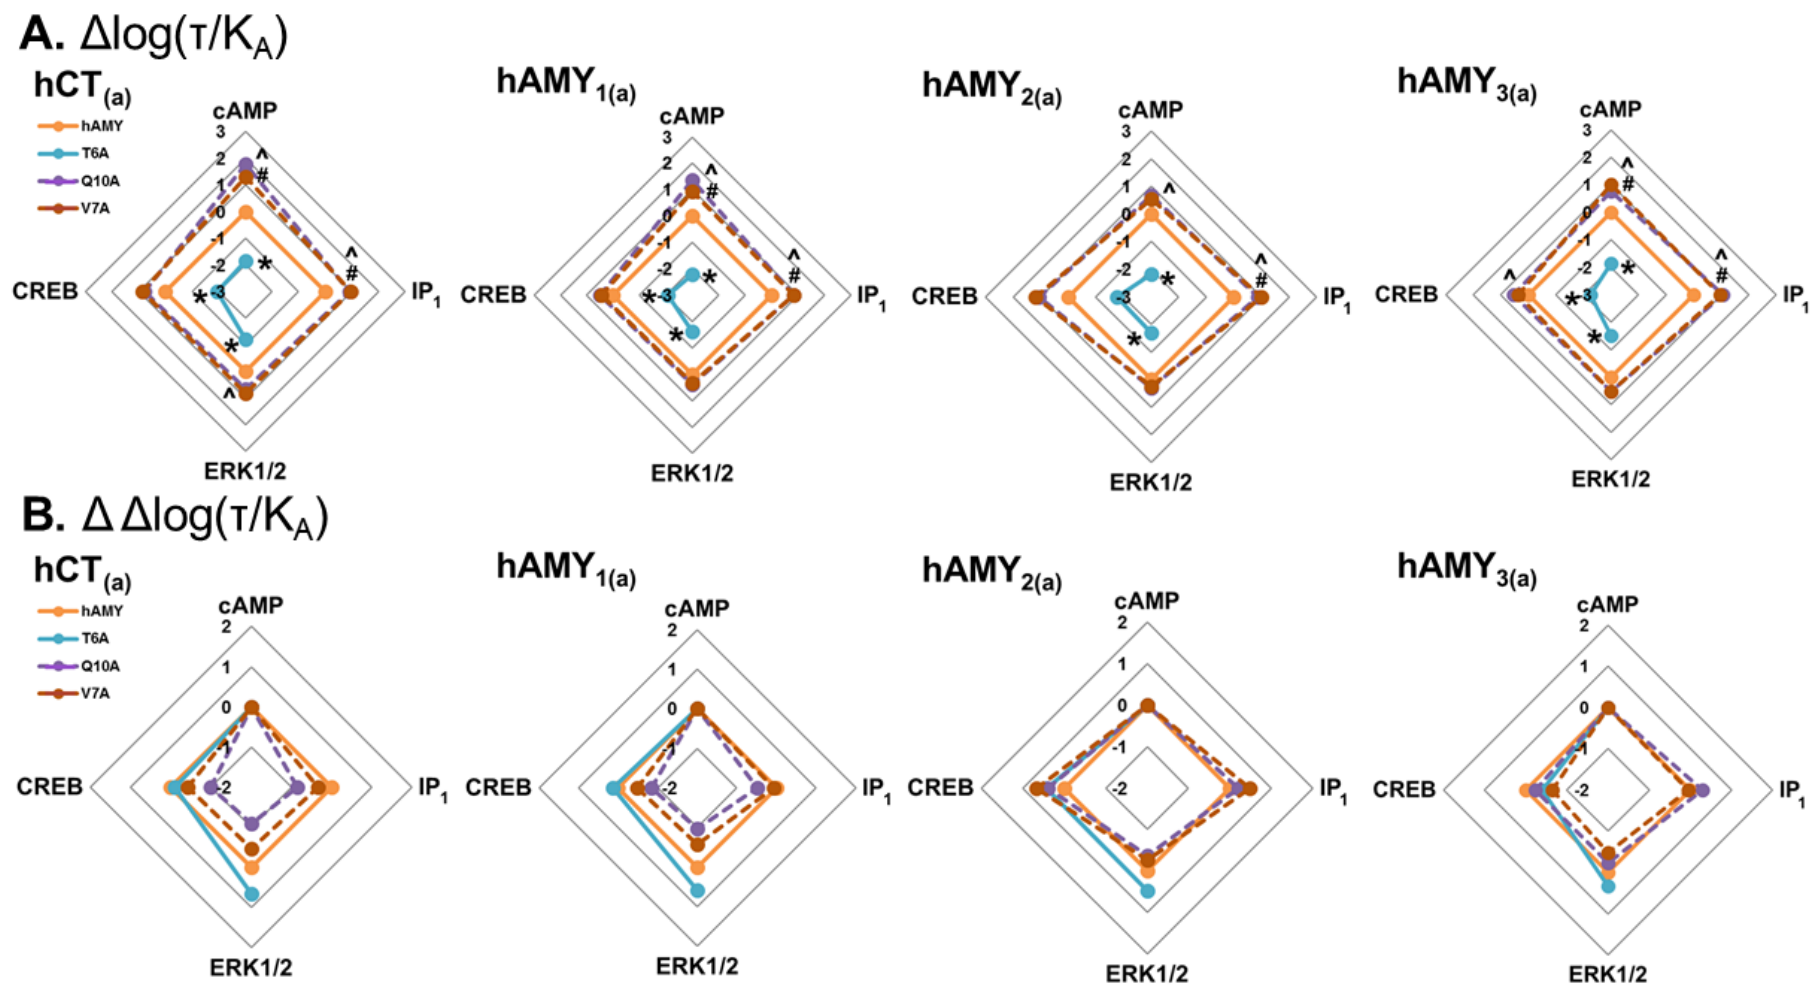

### Supplementary data tables 9-12

Data are mean  $\pm$  s.e.m. of  $n$  biological replicates, reporting activation of four different signaling pathways (cAMP, IP1, ERK1/2 [15 minutes] and CREB phosphorylation) at four different receptors (CTR, AMY<sub>1-3</sub>) by selected peptide analogues. Data were normalized to the relevant control in each experiment and E<sub>max</sub> values are % hAMY, or pramlintide for the relevant analogue. \* $P < 0.05$  by unpaired  $t$ -test for pEC<sub>50</sub> or where 95% confidence intervals did not include 100 for E<sub>max</sub>. Statistically significant increases or decreases are shaded as indicated.

**Table SB9.** Analogue Signaling CT<sub>(a)</sub>

|                        |  | decrease          |      | increase    |                  |      |    |
|------------------------|--|-------------------|------|-------------|------------------|------|----|
| <b>cAMP</b>            |  |                   |      |             |                  |      |    |
|                        |  | pEC <sub>50</sub> | SEM  | Fold-Change | E <sub>max</sub> | SEM  | n  |
| hAMY                   |  | 8.23              | 0.13 |             | 100              |      |    |
| T6A                    |  | 7.04*             | 0.17 | -16         | 41.8*            | 3.60 | 5  |
| hAMY                   |  | 8.71              | 0.15 |             | 100              |      |    |
| Q10A                   |  | 9.88*             | 0.29 | 15          | 169*             | 18.5 | 8  |
| hAMY                   |  | 8.40              | 0.16 |             | 100              |      |    |
| V17A                   |  | 9.33*             | 0.26 | 8.5         | 164*             | 26.7 | 10 |
| Pramlintide            |  | 8.82              | 0.23 |             | 100              |      |    |
| PramQ10A               |  | 9.29              | 0.16 | 2.9         | 139              | 20.1 | 6  |
| <b>IP1</b>             |  |                   |      |             |                  |      |    |
|                        |  | pEC <sub>50</sub> | SEM  | Fold-Change | E <sub>max</sub> | SEM  | n  |
| hAMY                   |  | 5.85              | 0.08 |             | 100              |      |    |
| T6A                    |  | <5                |      |             |                  |      | 5  |
| hAMY                   |  | 5.85              | 0.08 |             | 100              |      |    |
| Q10A                   |  | 6.80*             | 0.09 | 8.9         | 94               | 5.82 | 5  |
| hAMY                   |  | 5.85              | 0.08 |             | 100              |      |    |
| V17A                   |  | 6.79*             | 0.07 | 8.0         | 107              | 5.49 | 5  |
| Pramlintide            |  | 5.97              | 0.07 |             | 100              |      |    |
| PramQ10A               |  | 6.52*             | 0.05 | 3.5         | 112              | 5.98 | 4  |
| <b>ERK1/2 (15 min)</b> |  |                   |      |             |                  |      |    |
|                        |  | pEC <sub>50</sub> | SEM  | Fold-Change | E <sub>max</sub> | SEM  | n  |
| hAMY                   |  | 7.64              | 0.18 |             | 100              |      |    |
| T6A                    |  | 7.66              | 0.33 | 1.2         | 18.2*            | 4.07 | 5  |
| hAMY                   |  | 7.67              | 0.16 |             | 100              |      |    |
| Q10A                   |  | 8.20              | 0.24 | 3.4         | 134              | 18.8 | 6  |
| hAMY                   |  | 7.67              | 0.16 |             | 100              |      |    |
| V17A                   |  | 8.36*             | 0.13 | 4.9         | 133              | 14.3 | 6  |
| Pramlintide            |  | 7.74              | 0.13 |             | 100              |      |    |
| PramQ10A               |  | 8.21*             | 0.09 | 4.2         | 119              | 11.4 | 6  |
| <b>CREB</b>            |  |                   |      |             |                  |      |    |
|                        |  | pEC <sub>50</sub> | SEM  | Fold-Change | E <sub>max</sub> | SEM  | n  |
| hAMY                   |  | 9.12              | 0.28 |             | 100              |      |    |
| T6A                    |  | 7.34*             | 0.33 | -60         | 62.6             | 17.0 | 4  |
| hAMY                   |  | 9.01              | 0.23 |             | 100              |      |    |
| Q10A                   |  | 9.91*             | 0.16 | 8.1         | 105              | 9.33 | 6  |
| hAMY                   |  | 8.95              | 0.20 |             | 100              |      |    |
| V17A                   |  | 9.73*             | 0.19 | 6.0         | 127*             | 10.1 | 6  |
| Pramlintide            |  | 9.15              | 0.17 |             | 100              |      |    |
| PramQ10A               |  | 10.1*             | 0.20 | 8.9         | 99.4             | 10.9 | 6  |

**Table SB10.** Analogue Signaling AMY<sub>1(a)</sub>

|             |                   | decrease        |             | increase         |      |   |
|-------------|-------------------|-----------------|-------------|------------------|------|---|
|             |                   | cAMP            |             |                  |      |   |
|             | pEC <sub>50</sub> | SEM             | Fold-Change | E <sub>max</sub> | SEM  | n |
| hAMY        | 8.83              | 0.21            |             | 100              |      |   |
| T6A         | 7.50*             | 0.15            | -21         | 41.6*            | 5.90 | 5 |
| hAMY        | 9.38              | 0.13            |             | 100              |      |   |
| Q10A        | 10.4*             | 0.29            | 10.5        | 154*             | 15.2 | 9 |
| hAMY        | 9.20              | 0.14            |             | 100              |      |   |
| V17A        | 9.73*             | 0.16            | 3.4         | 139*             | 9.10 | 9 |
| Pramlintide | 9.74              | 0.13            |             | 100              |      |   |
| PramQ10A    | 9.46              | 0.19            | -1.9        | 129*             | 9.84 | 7 |
|             |                   | IP1             |             |                  |      |   |
|             | pEC <sub>50</sub> | SEM             | Fold-Change | E <sub>max</sub> | SEM  | n |
| hAMY        | 6.21              | 0.11            |             | 100              |      |   |
| T6A         | <5                |                 |             |                  |      | 5 |
| hAMY        | 6.21              | 0.11            |             | 100              |      |   |
| Q10A        | 7.07*             | 0.13            | 7.2         | 97               | 3.95 | 5 |
| hAMY        | 6.21              | 0.11            |             | 100              |      |   |
| V17A        | 7.03*             | 0.13            | 6.6         | 110*             | 3.23 | 5 |
| Pramlintide | 6.32              | 0.15            |             | 100              |      |   |
| PramQ10A    | 6.97*             | 0.06            | 4.5         | 113              | 7.69 | 4 |
|             |                   | ERK1/2 (15 min) |             |                  |      |   |
|             | pEC <sub>50</sub> | SEM             | Fold-Change | E <sub>max</sub> | SEM  | n |
| hAMY        | 8.21              | 0.12            |             | 100              |      |   |
| T6A         | 8.06              | 0.30            | -1.4        | 11*              | 1.99 | 5 |
| hAMY        | 8.43              | 0.14            |             | 100              |      |   |
| Q10A        | 8.63              | 0.15            | 1.6         | 134*             | 9.91 | 6 |
| hAMY        | 8.43              | 0.14            |             | 100              |      |   |
| V17A        | 8.59              | 0.10            | 1.4         | 134*             | 10.6 | 6 |
| Pramlintide | 8.61              | 0.10            |             | 100              |      |   |
| PramQ10A    | 8.61              | 0.10            | 0           | 109              | 5.33 | 5 |
|             |                   | CREB            |             |                  |      |   |
|             | pEC <sub>50</sub> | SEM             | Fold-Change | E <sub>max</sub> | SEM  | n |
| hAMY        | 9.77              | 0.18            |             | 100              |      |   |
| T6A         | 8.11*             | 0.27            | -45         | 60*              | 11.9 | 4 |
| hAMY        | 9.79              | 0.17            |             | 100              |      |   |
| Q10A        | 10.2              | 0.12            | 2.6         | 110              | 5.03 | 6 |
| hAMY        | 9.79              | 0.17            |             | 100              |      |   |
| V17A        | 10.2              | 0.12            | 2.6         | 110              | 11.1 | 6 |
| Pramlintide | 10.2              | 0.34            |             | 100              |      |   |
| PramQ10A    | 10.7              | 0.30            | 3.2         | 101              | 6.00 | 5 |

**Table SB11.** Analogue Signaling AMY<sub>2(a)</sub>

|             |  | decrease          |      | increase    |                  |      |   |
|-------------|--|-------------------|------|-------------|------------------|------|---|
|             |  | cAMP              |      |             |                  |      |   |
|             |  | pEC <sub>50</sub> | SEM  | Fold-Change | E <sub>max</sub> | SEM  | n |
| hAMY        |  | 8.86              | 0.01 |             | 100              |      |   |
| T6A         |  | 7.14              | 0.07 | -52         | 38.0             | 4.50 | 3 |
| hAMY        |  | 8.86              | 0.01 |             | 100              |      |   |
| Q10A        |  | 9.38              | 0.07 | 3.7         | 141*             | 13.7 | 3 |
| hAMY        |  | 8.86              | 0.01 |             | 100              |      |   |
| V17A        |  | 9.43              | 0.29 | 3.7         | 110              | 15.3 | 3 |
| Pramlintide |  | 8.87              | 0.09 |             | 100              |      |   |
| PramQ10A    |  | 9.70*             | 0.03 | 6.8         | 96.4             | 4.10 | 3 |
|             |  | IPI               |      |             |                  |      |   |
|             |  | pEC <sub>50</sub> | SEM  | Fold-Change | E <sub>max</sub> | SEM  | n |
| hAMY        |  | 5.94              | 0.10 |             | 100              |      |   |
| T6A         |  | <5                |      |             |                  |      | 5 |
| hAMY        |  | 5.94              | 0.10 |             | 100              |      |   |
| Q10A        |  | 6.84*             | 0.13 | 7.9         | 99.7             | 10.8 | 5 |
| hAMY        |  | 5.94              | 0.10 |             | 100              |      |   |
| V17A        |  | 6.90*             | 0.09 | 9.1         | 117              | 15.9 | 5 |
| Pramlintide |  | 5.87              | 0.10 |             | 100              |      |   |
| PramQ10A    |  | 6.61*             | 0.09 | 5.5         | 97.6             | 9.64 | 4 |
|             |  | ERK1/2 (15 min)   |      |             |                  |      |   |
|             |  | pEC <sub>50</sub> | SEM  | Fold-Change | E <sub>max</sub> | SEM  | n |
| hAMY        |  | 7.72              | 0.10 |             | 100              |      |   |
| T6A         |  | 7.45              | 0.24 | -1.9        | 18*              | 3.41 | 4 |
| hAMY        |  | 8.01              | 0.35 |             | 100              |      |   |
| Q10A        |  | 8.27              | 0.30 | 1.8         | 122              | 11.1 | 4 |
| hAMY        |  | 8.01              | 0.35 |             | 100              |      |   |
| V17A        |  | 8.26              | 0.19 | 1.8         | 125              | 28.6 | 4 |
| Pramlintide |  | 8.08              | 0.31 |             | 100              |      |   |
| PramQ10A    |  | 8.48              | 0.30 | 2.5         | 117              | 16.4 | 5 |
|             |  | CREB              |      |             |                  |      |   |
|             |  | pEC <sub>50</sub> | SEM  | Fold-Change | E <sub>max</sub> | SEM  | n |
| hAMY        |  | 8.94              | 0.65 |             | 100              |      |   |
| T6A         |  | 7.70              | 0.17 | -17         | 53*              | 4.62 | 3 |
| hAMY        |  | 9.63              | 0.33 |             | 100              |      |   |
| Q10A        |  | 10.2              | 0.18 | 3.7         | 120              | 8.16 | 4 |
| hAMY        |  | 9.57              | 0.34 |             | 100              |      |   |
| V17A        |  | 10.1              | 0.23 | 3.4         | 110              | 6.63 | 3 |
| Pramlintide |  | 9.89              | 0.26 |             | 100              |      |   |
| PramQ10A    |  | 10.3              | 0.20 | 2.6         | 94.9             | 12.7 | 5 |

**Table SB12.** Analogue Signaling AMY<sub>3(a)</sub>

|             |  | decrease          |      | increase    |                  |      |   |
|-------------|--|-------------------|------|-------------|------------------|------|---|
|             |  | cAMP              |      |             |                  |      |   |
|             |  | pEC <sub>50</sub> | SEM  | Fold-Change | E <sub>max</sub> | SEM  | n |
| hAMY        |  | 8.95              | 0.12 |             | 100              |      |   |
| T6A         |  | 7.87*             | 0.10 | -12         | 43.2*            | 11.2 | 7 |
| hAMY        |  | 9.14              | 0.17 |             | 100              |      |   |
| Q10A        |  | 9.42              | 0.20 | 1.9         | 134*             | 5.90 | 7 |
| hAMY        |  | 8.99              | 0.15 |             | 100              |      |   |
| V17A        |  | 9.49              | 0.18 | 3.2         | 121              | 13.2 | 7 |
| Pramlintide |  | 9.75              | 0.19 |             | 100              |      |   |
| PramQ10A    |  | 9.89              | 0.20 | 1.4         | 129*             | 11.4 | 7 |
|             |  | IP1               |      |             |                  |      |   |
|             |  | pEC <sub>50</sub> | SEM  | Fold-Change | E <sub>max</sub> | SEM  | n |
| hAMY        |  | 6.01              | 0.11 |             | 100              |      |   |
| T6A         |  | <5                |      |             |                  |      | 5 |
| hAMY        |  | 6.01              | 0.11 |             | 100              |      |   |
| Q10A        |  | 7.04*             | 0.16 | 11          | 105              | 2.20 | 5 |
| hAMY        |  | 6.01              | 0.11 |             | 100              |      |   |
| V17A        |  | 6.97*             | 0.10 | 9.1         | 100              | 4.58 | 5 |
| Pramlintide |  | 6.31              | 0.15 |             | 100              |      |   |
| PramQ10A    |  | 7.04*             | 0.08 | 5.4         | 128*             | 3.97 | 4 |
|             |  | ERK1/2 (15 min)   |      |             |                  |      |   |
|             |  | pEC <sub>50</sub> | SEM  | Fold-Change | E <sub>max</sub> | SEM  | n |
| hAMY        |  | 8.14              | 0.08 |             | 100              |      |   |
| T6A         |  | 7.94              | 0.35 |             | 17*              | 5.79 | 4 |
| hAMY        |  | 8.29              | 0.10 |             | 100              |      |   |
| Q10A        |  | 8.57              | 0.11 | 1.9         | 148              | 17.9 | 5 |
| hAMY        |  | 8.29              | 0.10 |             | 100              |      |   |
| V17A        |  | 8.52              | 0.15 | 1.7         | 173              | 29.6 | 5 |
| Pramlintide |  | 8.21              | 0.24 |             | 100              |      |   |
| PramQ10A    |  | 8.63              | 0.15 | 2.6         | 124              | 19.5 | 5 |
|             |  | CREB              |      |             |                  |      |   |
|             |  | pEC <sub>50</sub> | SEM  | Fold-Change | E <sub>max</sub> | SEM  | n |
| hAMY        |  | 9.45              | 0.26 |             | 100              |      |   |
| T6A         |  | 7.94*             | 0.22 | -32         | 49.2*            | 8.00 | 4 |
| hAMY        |  | 9.63              | 0.33 |             | 100              |      |   |
| Q10A        |  | 10.2              | 0.18 | 3.7         | 104              | 5.39 | 5 |
| hAMY        |  | 9.31              | 0.15 |             | 100              |      |   |
| V17A        |  | 9.99*             | 0.19 | 4.8         | 109              | 6.52 | 4 |
| Pramlintide |  | 10.2              | 0.28 |             | 100              |      |   |
| PramQ10A    |  | 10.6              | 0.21 | 2.5         | 91.3             | 11.6 | 6 |

**Figure SB22.** Competition binding data at  $AMY_1$ , comparing pramlintide and DAGAR1. Data are mean  $\pm$  s.e.m. of  $n$  biological replicates. The control peptide was compared to the analogue by unpaired t test, \*  $P < 0.05$ .

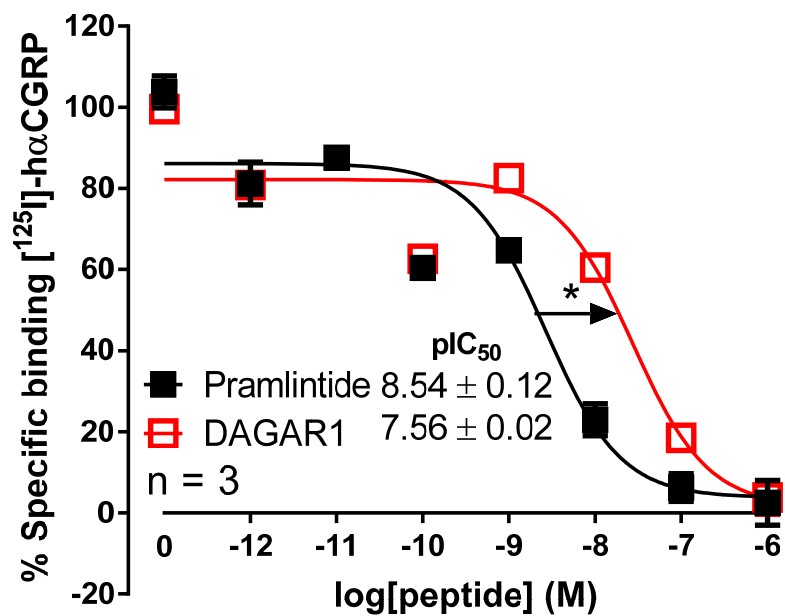



**Figure SB23.** Indication of variation between experiments. a) shows data for ten typical independent experiments with the AMY<sub>1</sub> receptor transiently transfected into Cos 7 cells and stimulated with hAMY. Each data point is an experimental replicate within an experiment b) shows the corresponding E<sub>max</sub> values for each of those experiments and c) shows the corresponding pEC<sub>50</sub> values.

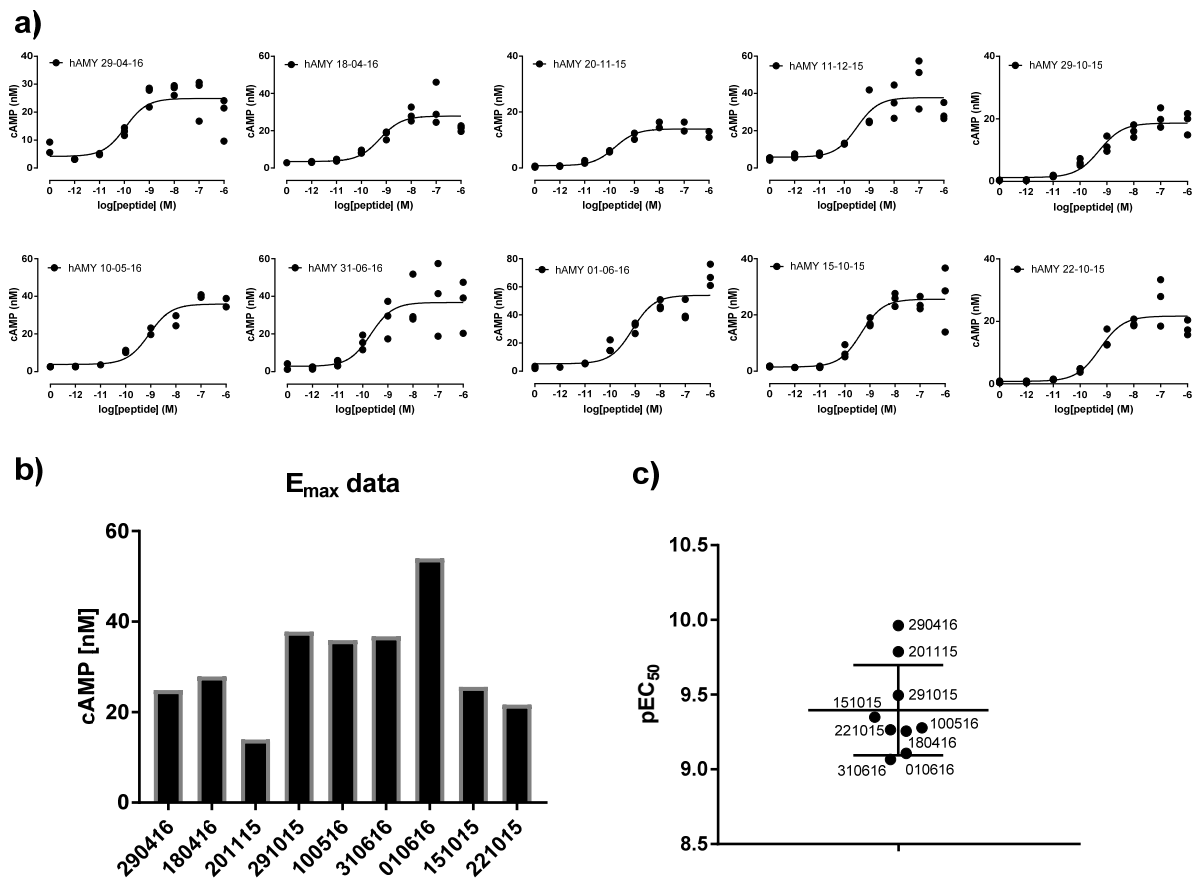

**Figure SB24.**  $^{125}\text{I}$ -Calcitonin gene-related peptide (CGRP) binding to whole cells transfected with different receptors. hCGRP is the CGRP receptor comprising RAMP1 with the calcitonin-like receptor. Data are mean  $\pm$  s.e.m. of duplicate or triplicate technical replicates from a single experiment. Similar results were obtained in at least four other experiments. NS, non-specific.

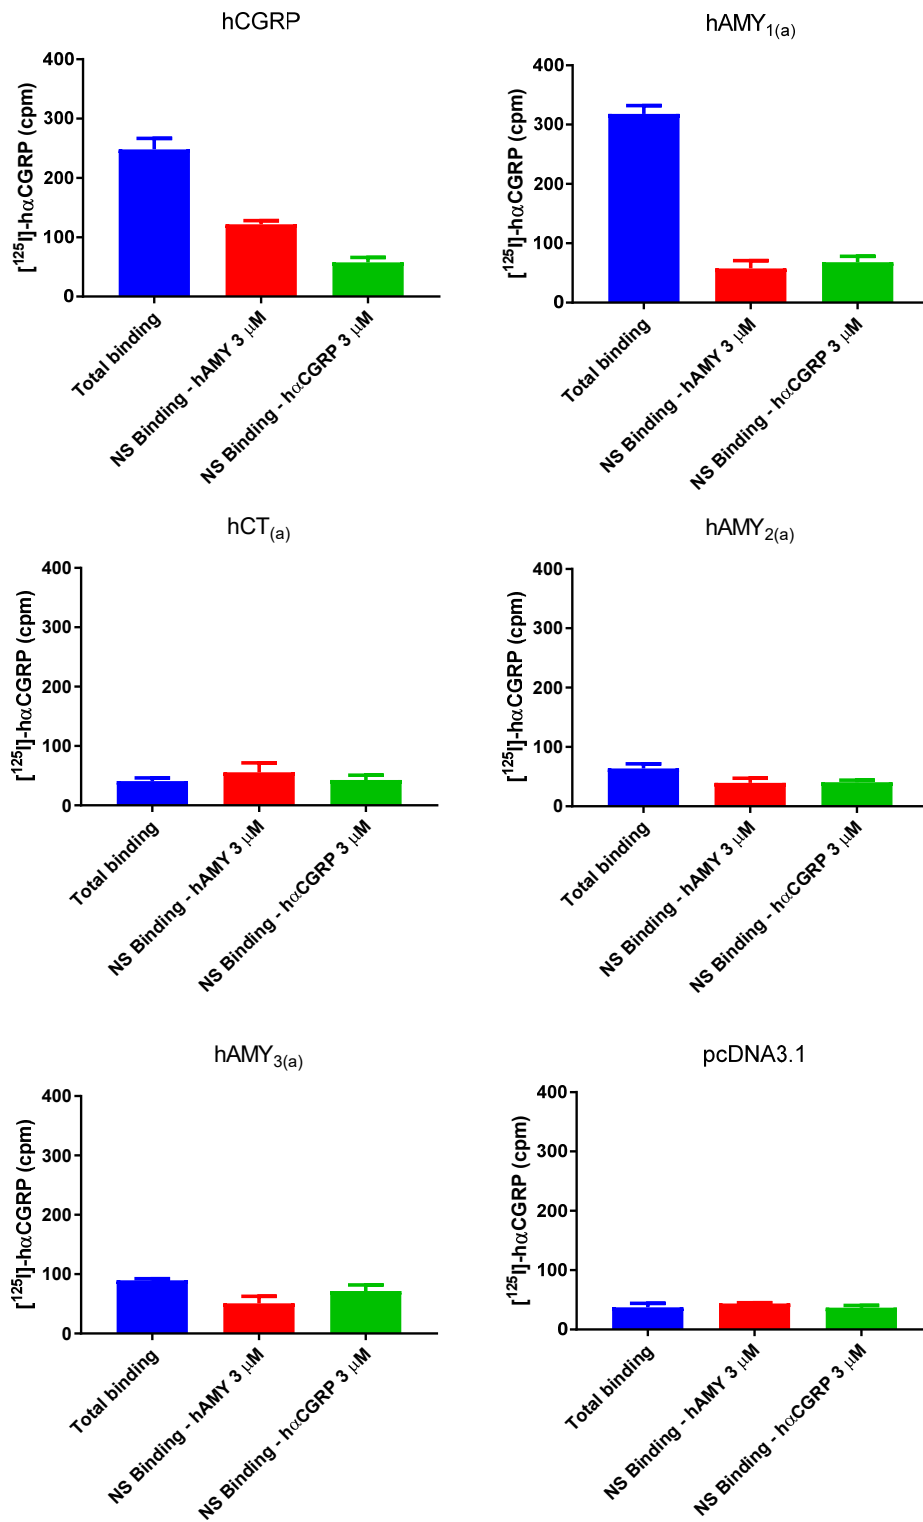

- [1] Clamp, M., Cuff, J., Searle, S. M., and Barton, G. J. (2004) The Jalview Java alignment editor, *Bioinformatics* 20, 426-427. [10.1093/bioinformatics/btg430](https://doi.org/10.1093/bioinformatics/btg430)
