# Supplementary material
Source: PubMed Central journal article supplement (PMC7088893)
Supplement: pt8b00002_si_002.pdf [file pt8b00002_si_002.pdf]

## **Supplementary Chemistry (SC), Methods, Tables and Figures**

### **1. Materials**

All reagents were purchased as reagent grade and used without further purification. *O*-(6-Chlorobenzotriazol-1-yl)-*N,N,N,N*-tetramethyluronium hexafluorophosphate (HCTU), *O*-(7-azabenzotriazol-1-yl)-*N,N,N,N*-tetramethyluronium hexafluorophosphate (HATU), *N*-(9-fluorenylmethoxycarbonyloxy) succinimide (FmocOSu), 4-[(*R,S*)- $\alpha$ -[1-(9*H*-fluoren-9-yl)]-methoxycarbonylamino]-2,4-dimethoxy]phenoxyacetic acid (Fmoc-Rink amide linker) and Fmoc-amino acids were purchased from GL Biochem (Shanghai, China). Fmoc-amino acids were supplied with the following side-chain protection: Fmoc-Tyr(*t*Bu)-OH, Fmoc-Thr(*t*Bu)-OH, Fmoc-Ser(*t*Bu)-OH, Fmoc-Asn(Trt)-OH (Trt = triphenylmethyl), Fmoc-His(Trt)-OH, Fmoc-Arg(Pbf)-OH (Pbf = 2,2,4,6,7-pentamethylidihydrobenzofuran-5-sulfonyl), Fmoc-Gln(Trt)-OH, Fmoc-Cys(Trt)-OH, Fmoc-Lys(Boc)-OH (Boc = *tert*-butyloxycarbonyl).

Fmoc-Ser(*t*Bu)-Ser( $\Psi^{\text{Me,Me}}$ pro)-OH, Fmoc-Ala-Thr( $\Psi^{\text{Me,Me}}$ pro)-OH and Fmoc-Leu-Ser( $\Psi^{\text{Me,Me}}$ pro)-OH were purchased from Aapptec (Louisville, Kentucky). *N,N*-Diisopropylethylamine (*i*Pr<sub>2</sub>NEt), 2,4,6-collidine, piperidine, *N,N'*-diisopropylcarbodiimide (DIC), 3,6-dioxo-1,8-octanedithiol (DOTD), triisopropylsilane (*i*Pr<sub>3</sub>SiH), 1-methyl-2-pyrrolidinone (NMP), 6-chloro-1-hydroxybenzotriazole (6-Cl-HOBt), ninhydrin, phenol, potassium cyanide (KCN), methanol (MeOH), ethanol (EtOH), diethyl ether (Et<sub>2</sub>O), *N*-methylmorpholine, 2,2'-dithiobis(5-nitropyridine) (DTNP), copper(II) sulphate pentahydrate (CuSO<sub>4</sub>·5 H<sub>2</sub>O), and triisopropylsilane (*i*Pr<sub>3</sub>SiH) were purchased from Sigma-Aldrich (St. Louis, Missouri). Dichloromethane (CH<sub>2</sub>Cl<sub>2</sub>), magnesium sulphate (MgSO<sub>4</sub>), sodium bicarbonate (NaHCO<sub>3</sub>), sodium carbonate (Na<sub>2</sub>CO<sub>3</sub>), sodium ascorbate (Na ascorbate), ethyl acetate (EtOAc) and hexane were purchased from ECP limited (Auckland, New Zealand). Hydrochloric acid (HCl), sodium hydroxide (NaOH), *N,N*-dimethylformamide (DMF) (synthesis grade), and acetonitrile (MeCN), were purchased from Scharlau (Barcelona, Spain). Dimethyl sulfoxide (DMSO) was purchased from Romil Limited (Cambridge, United Kingdom). L-propargylglycine (L-Pra) was purchased from AK Scientific (Union City, California). Tetrahydrofuran (THF) was purchased from Avantor Performance Materials (Centre Valley, Pennsylvania). Trifluoroacetic acid (TFA) was purchased from Halocarbon (River Edge, New Jersey).

Aminomethyl Chemmatrix® resin (AM-CM) was purchased from Pcas BioMatrix Inc (Quebec, Canada). Aminomethyl polystyrene resin (AM-PS),<sup>1</sup> Fmoc-propargylglycine (Fmoc-L-Pra-OH),<sup>2</sup> and Fmoc-L-azidolysine<sup>3</sup> were synthesised following literature procedures.

### **2. General procedures for peptide synthesis**

The general procedure for peptide synthesis is shown in Figure SC1.

#### **2.1. General Method for attachment of linker to resin**

The *C*-terminal amide of native human amylin was necessary to attain the final biologically active peptide, and this was installed by use of the Fmoc-Rink amide linker. Briefly, Fmoc-Rink amide, DIC (4 eq.) and 6-Cl-HOBt (4 eq.) were dissolved in DMF (3 mL). The solution was added to either the pre-swollen (DMF, 3 mL, 20 min) aminomethyl polystyrene (AM-PS, loading 0.91 mmol/g) or aminomethyl Chemmatrix® (AM-CM, loading 0.69 mmol/g) resin and shaken for 2 h at room temperature (rt). The resin was then filtered and washed (DMF, 3 x 3 mL).

For synthesis of human amylin -COOH incorporating a *C*-terminal acid, a solution of Fmoc-Tyr(*t*Bu)-O-CH<sub>2</sub>-phi-OCH<sub>2</sub>-CH<sub>2</sub>-COOH (Fmoc-Tyr-HMPP, 2 eq.) and DIC (2 eq.) in CH<sub>2</sub>Cl<sub>2</sub>/DMF (v/v; 2 : 1, 3 mL) was added to pre-swollen (CH<sub>2</sub>Cl<sub>2</sub>, 3 mL, 20 min) AM-CM resin, shaken for 2 h at rt, filtered and washed (CH<sub>2</sub>Cl<sub>2</sub>, 3 x 3 mL).

For synthesis of C2S-C7S and CAM human amylin analogs, the *C*-terminal amide was installed by use of a 5-[3,5-dimethoxy-4-(Fmoc-aminomethyl)phenoxy]pentanoic acid (Fmoc-PAL) linker.

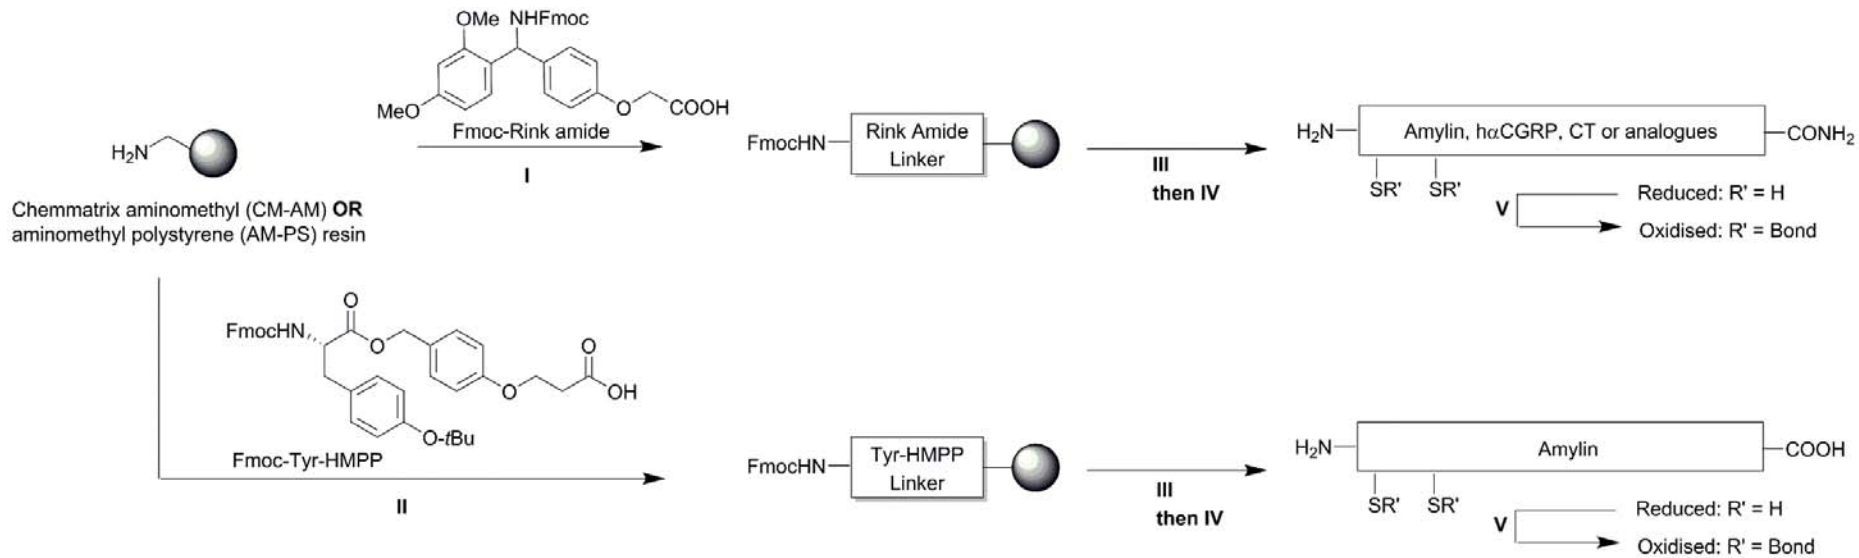

**Figure SC1.** Synthesis of human amylin, hαCGRP, calcitonin (CT) and analogues, excluding truncated peptides and disulfide modifications. Reagents and conditions: (I) DIC (4 eq.), 6-Cl HOBt (4 eq.), DMF, rt, 2 h; (II) Fmoc-Tyr(*t*Bu)-HMPP (2 eq.), DIC (2 eq.), CH<sub>2</sub>Cl<sub>2</sub>/DMF; (III) Fmoc SPPS: Fmoc-AA-OH coupling: Fmoc-AA-OH (5 eq.), activator, base; Fmoc-deprotection: 20% piperidine in DMF (see Supplementary Chemistry for details); (IV) TFA/*i*Pr<sub>3</sub>SiH/DODT/H<sub>2</sub>O (94/1/2.5/2.5, v/v), rt, 2-3 h; (V) DTNP in DMSO, rt, 20 min.

## 2.2. General Method for Biotage<sup>®</sup> initiator + alstra and Liberty peptide synthesisers (microwave)

Stock solutions for Fmoc-protected amino acids (0.2 M in DMF), HATU (0.5 M in DMF), and *i*Pr<sub>2</sub>NEt (2 M in NMP) were prepared prior to synthesis.

The Fmoc group was removed using 20% piperidine in DMF (2 x 3 min at maximum temperature of 70 °C and at 62 W). All amino acid couplings were performed as single coupling cycles with the exception of Fmoc-Arg(Pbf)-OH, Fmoc-His(Trt)-OH and Fmoc-Cys(Trt)-OH where a double coupling cycle was performed. Protected amino acids were incorporated using Fmoc-AA-OH (5.0 eq.), HCTU (4.5 eq.) and *i*Pr<sub>2</sub>NEt (10 eq.) in NMP, for 5 min at a maximum temperature of 75 °C and at 25 W, except Fmoc-Arg(Pbf)-OH which was coupled for 25 min at room temperature followed by a second coupling for 5 min at a maximum temperature of 72 °C at 25 W, and Fmoc-His(Trt)-OH and Fmoc-Cys(Trt)-OH which were coupled for 10 min at room temperature followed by a second coupling for 5 min at a maximum temperature of 47 °C at 25 W. Coupling of Fmoc-Ser(*t*Bu)-Ser( $\psi^{\text{Me,Me}}$ pro)-OH (2 eq.) and Fmoc-Ala-Thr( $\psi^{\text{Me,Me}}$ pro)-OH (2 eq.) (Figure SC2) were undertaken via manual addition of reagents. The building blocks were dissolved in a solution of HATU (1.9 eq.) and 2,4,6-collidine (6 eq.) in DMF (2 mL) and coupled for 15 min at a maximum temperature of 75 °C at 25 W.

## 2.3. General Method for Tribute<sup>™</sup> peptide synthesiser (room temperature)

Prior to synthesis, stock solutions were prepared for HCTU (0.23 M in DMF) and NMM (2 M in NMP). The Fmoc group was removed using 20% piperidine in DMF (2 x 5 min). All amino acids were double-coupled, with the exception of Fmoc-Arg(Pbf)-OH which was triple-coupled. Protected amino acids were incorporated using Fmoc-AA-OH (5.0 eq.), HCTU (4.6 eq.) and NMM (10 eq.) in DMF, for 10 min per coupling. Fmoc-Ser(*t*Bu)-Ser( $\psi^{\text{Me,Me}}$ pro)-OH and Fmoc-Ala-Thr( $\psi^{\text{Me,Me}}$ pro)-OH (2 eq.) were coupled via manual addition of reagents for 1.5 h at room temperature in the presence of HATU (1.9 eq.) and 2,4,6-collidine (6 eq.) in DMF.

## 2.4. General Method for PS3<sup>™</sup> peptide synthesiser (room temperature)

A stock solution was prepared for NMM (0.4 M in DMF). The Fmoc group was removed using 20% piperidine in DMF (2 x 5 min). All amino acid couplings were performed as single coupling cycles. Protected amino acids were incorporated using Fmoc-AA-OH (5.0 eq.), HATU (4.5 eq.) and NMM (10 eq.) in DMF, for 20 min. Fmoc-Ser(*t*Bu)-Ser( $\psi^{\text{Me,Me}}$ pro)-OH, Fmoc-Ala-Thr( $\psi^{\text{Me,Me}}$ pro)-OH, and/or Fmoc-Leu-Ser( $\psi^{\text{Me,Me}}$ pro)-OH (5 eq.) (Figure SC2) were coupled using the same conditions.

## 2.5. General Method for cleavage from the resin

Cleavage from the resin with simultaneous side-chain deprotection was achieved by treatment with TFA/*i*Pr<sub>3</sub>SiH/H<sub>2</sub>O/DODT (94/1/2.5/2.5, v/v/v/v) for 2-3 hours. The resin was drained, washed with TFA (5 mL), precipitated with cold diethyl ether, isolated by centrifugation, dissolved in 50% aqueous acetonitrile containing 0.1% TFA and lyophilised.

## 3. General Method for disulfide bond formation

Crude peptides were dissolved in DMSO (10 mg/mL) and a solution of DTNP (0.5 eq.) in DMSO (20 mg/mL) was added and the mixture was shaken for 20 min. The mixture was diluted with H<sub>2</sub>O containing 0.1% TFA to a concentration of 1 mg/mL and immediately purified by semi-preparative reverse phase high-performance liquid chromatography (RP-HPLC).

## 4. Method for preparation of CAM-human amylin

CAM-human amylin was prepared by incubating purified human amylin in a solution of 13 mM DTT, 6 M GdnHCl, 0.19 M Tris HCl, and 10% DMSO at pH 8.0 for 4 hours at 4 °C under N<sub>2</sub> (g) to reduce the peptide. After reduction, iodoacetamide was added to the cocktail to a final concentration of 8 mM, for 4 hours at 4 °C in the dark. The reaction was quenched with 80 mM 2-mercaptoethanol. After purification by HPLC residual scavengers were removed via HFIP extraction.

## 5. General procedure for purification and analysis

Analytical RP-HPLC was performed on a Dionex Ultimate 3000 using the following columns: Vydac Diphenyl 300 Å, 3 µm, 4.6 mm x 250 mm; Agilent Zorbax 300SB-C3, 3.0 mm x 150 mm; Agilent TC-C18, 5 µm, 4.6 x 250 mm. Liquid-chromatography mass spectrometry (LCMS) was performed on an Agilent Technologies 1120 Compact LC connected to a HP Series 1100 MSD spectrometer using an Agilent Zorbax 300SB-C3, 3.5 µm, 3.0

mm x 150 mm column using linear gradient of 0.1% formic acid in water (A) and 0.1% formic acid MeCN (B). Semi-preparative RP-HPLC was performed using either a Waters 600E System with a Waters 2487 dual wavelength absorbance detector or a Dionex Ultimate 3000 using the following columns: Phenomenex Gemini C<sub>18</sub> 110 Å, 5 µm, 10.0 mm x 250 mm (5 mL/min); Vydac Diphenyl 300 Å, 5 µm, 10.0 mm x 250 mm (5 mL/min); Vydac C4 300 Å, 5 µm, 10.0 mm x 250 mm (5 mL/min), Higgins Proto C18 300 Å, 5 µm, 10.0 x 250 mm column (5 mL/min). The columns and HPLC systems used for the semi-preparative RP-HPLC of individual peptides is outlined in Table SC1. A linear gradient of 0.1% TFA/water (A) and 0.1% TFA/MeCN (B) was used with detection at 210 nm. Gradient systems used for semi-preparative RP-HPLC were adjusted according to the elution and peak profiles obtained from the analytical RP-HPLC chromatograms.

**Table SC1:** Conditions used for the synthesis, and purity of individual peptides. Pseudoprolines ( $\psi$ Pro) refers to incorporation of pseudoproline in place of regular Fmoc amino acids (1: Fmoc-Ser(*t*Bu)-Ser( $\psi^{\text{Me,Me}}$ pro)-OH at position 28 and 29, 2: Fmoc-Ser(*t*Bu)-Ser( $\psi^{\text{Me,Me}}$ pro)-OH at position 19 and 20, 3: Fmoc-Ala-Thr( $\psi^{\text{Me,Me}}$ pro)-OH at position 8 and 9, 4: Fmoc-Leu-Ser( $\psi^{\text{Me,Me}}$ pro)-OH at position 27-28 5: Fmoc-Leu-Ser( $\psi^{\text{Me,Me}}$ pro)-OH at position 16-17 (CGRP analogs only)). Purity was assessed by integration of the chromatogram at 210 nm. hAMY, human amylin; hCT, human calcitonin; h $\alpha$ CGRP, human alpha calcitonin gene-related peptide; pram, pramlintide.

|                                              | Scale (mM) | Synthesiser                | Resin | Pseudoprolines | Purification Column               | Purity (%) |
|----------------------------------------------|------------|----------------------------|-------|----------------|-----------------------------------|------------|
| hAMY                                         | 0.1        | Liberty                    | AM-PS | 1              | Vydac Diphenyl                    | 95         |
| K1A                                          | 0.1        | Liberty                    | AM-PS | 1              | Vydac Diphenyl                    | 96         |
| N3A                                          | 0.05       | Liberty                    | AM-PS | 1              | Vydac Diphenyl                    | 98         |
| T4A                                          | 0.1        | Liberty                    | AM-PS | 1              | Vydac Diphenyl                    | 92         |
| A5G                                          | 0.1        | PS3                        | AM-CM | 1,2,3          | Vydac Diphenyl                    | 96         |
| T6A                                          | 0.1        | Liberty                    | AM-PS | 1,3            | Vydac Diphenyl                    | 95         |
| A8G                                          | 0.1        | PS3                        | AM-CM | 1,2            | Vydac Diphenyl                    | 96         |
| T9A                                          | 0.05       | Liberty                    | AM-PS | 1              | Vydac Diphenyl                    | 96         |
| Q10A                                         | 0.1        | Biotage                    | AM-CM | 1,3            | Phenomenex Gemini C <sub>18</sub> | 98         |
| R11A                                         | 0.1        | Tribute                    | AM-PS | 1,2            | Vydac Diphenyl                    | 91         |
| L12A                                         | 0.1        | PS3                        | AM-CM | 1,2,3          | Vydac C4                          | 98         |
| A13G                                         | 0.1        | PS3                        | AM-CM | 1,2,3          | Vydac C4                          | 93         |
| N14A                                         | 0.1        | Tribute                    | AM-PS | 1,2            | Vydac Diphenyl                    | 98         |
| F15A                                         | 0.1        | Tribute                    | AM-PS | 1,2            | Vydac Diphenyl                    | 97         |
| L16A                                         | 0.1        | Tribute                    | AM-PS | 1,2            | Vydac Diphenyl                    | 97         |
| V17A                                         | 0.1        | PS3                        | AM-CM | 1,2,3          | Vydac Diphenyl                    | 96         |
| I26A                                         | 0.1        | PS3                        | AM-CM | 2              | Phenomenex Gemini C <sub>18</sub> | 99         |
| L27A                                         | 0.1        | PS3                        | AM-CM | 2              | Phenomenex Gemini C <sub>18</sub> | 98         |
| S28A                                         | 0.1        | PS3                        | AM-CM | 2              | Phenomenex Gemini C <sub>18</sub> | 94         |
| S29A                                         | 0.1        | PS3                        | AM-CM | 2              | Phenomenex Gemini C <sub>18</sub> | 95         |
| T30A                                         | 0.1        | PS3                        | AM-CM | 2              | Phenomenex Gemini C <sub>18</sub> | 94         |
| N31A                                         | 0.1        | PS3                        | AM-CM | 2              | Phenomenex Gemini C <sub>18</sub> | 97         |
| V32A                                         | 0.1        | PS3                        | AM-CM | 2              | Phenomenex Gemini C <sub>18</sub> | 96         |
| G33A                                         | 0.1        | PS3                        | AM-CM | 2              | Phenomenex Gemini C <sub>18</sub> | 98         |
| S34A                                         | 0.1        | PS3                        | AM-CM | 2              | Phenomenex Gemini C <sub>18</sub> | 94         |
| N35A                                         | 0.1        | PS3                        | AM-CM | 2              | Phenomenex Gemini C <sub>18</sub> | 94         |
| T36A                                         | 0.1        | PS3                        | AM-CM | 2              | Phenomenex Gemini C <sub>18</sub> | 93         |
| Y37A                                         | 0.1        | PS3                        | AM-CM | 2              | Phenomenex Gemini C <sub>18</sub> | 98         |
| hAMY <sub>1-17</sub>                         | 0.1        | PS3                        | AM-CM | 3              | Vydac C4                          | 99         |
| hAMY <sub>8-37</sub>                         | 0.1        | PS3                        | AM-CM | 1,2,3          | Phenomenex Gemini C <sub>18</sub> | 85         |
| hAMY <sub>8-37(DR)</sub>                     | 0.1        | Liberty                    | AM-PS | 2,4            | Higgins Proto C <sub>18</sub>     | 97         |
| hAMY <sub>A<math>\alpha</math>8-37(DR)</sub> | 0.1        | Liberty                    | AM-PS | 2,4            | Higgins Proto C <sub>18</sub>     | 83         |
| C2S-C7S                                      | 0.1        | Liberty                    | AM-PS | 2,3,4          | Higgins Proto C <sub>18</sub>     | 90         |
| CAM-hAMY                                     | 0.1        | Liberty                    | AM-PS | 2,3,4          | Higgins Proto C <sub>18</sub>     | 93         |
| A5S                                          | 0.1        | PS3                        | AM-CM | 1,2,3          | Vydac Diphenyl                    | 95         |
| Y37F                                         | 0.1        | PS3                        | AM-CM | 1,2,3          | Phenomenex Gemini C <sub>18</sub> | 99         |
| Y37P                                         | 0.1        | PS3                        | AM-CM | 1,2,3          | Phenomenex Gemini C <sub>18</sub> | 95         |
| h $\alpha$ CGRP                              | 0.1        | PS3                        | AM-CM | 5              | Phenomenex Gemini C <sub>18</sub> | 97         |
| h $\alpha$ CGRP F37Y                         | 0.1        | PS3                        | AM-CM | 5              | Phenomenex Gemini C <sub>18</sub> | 96         |
| hCT                                          | 0.1        | PS3                        | AM-CM | -              | Phenomenex Gemini C <sub>18</sub> | 95         |
| hCT P32Y                                     | 0.1        | PS3                        | AM-CM | -              | Phenomenex Gemini C <sub>18</sub> | 96         |
| hAMY-COOH                                    | 0.1        | Biotage Initiator + Alstra | AM-CM | 2              | Phenomenex Gemini C <sub>18</sub> | 99         |
| Q10A pram                                    | 0.1        | PS3                        | AM-CM | 3              | Vydac C4                          | 99         |
| DAGARI                                       | -          | -                          | -     | -              | Phenomenex Gemini C <sub>18</sub> | 98         |

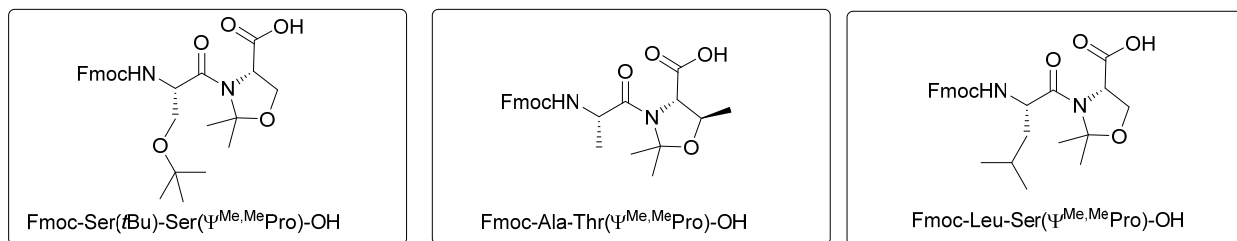

**Figure SC2:** Chemical structures of Fmoc-Ser(*t*Bu)-Ser( $\psi^{\text{Me,Me}}$ pro)-OH, Fmoc-Ala-Thr( $\psi^{\text{Me,Me}}$ pro)-OH and Fmoc-Leu-Ser( $\psi^{\text{Me,Me}}$ pro)-OH used for the synthesis of human amylin, h $\alpha$ CGRP, and analogs.

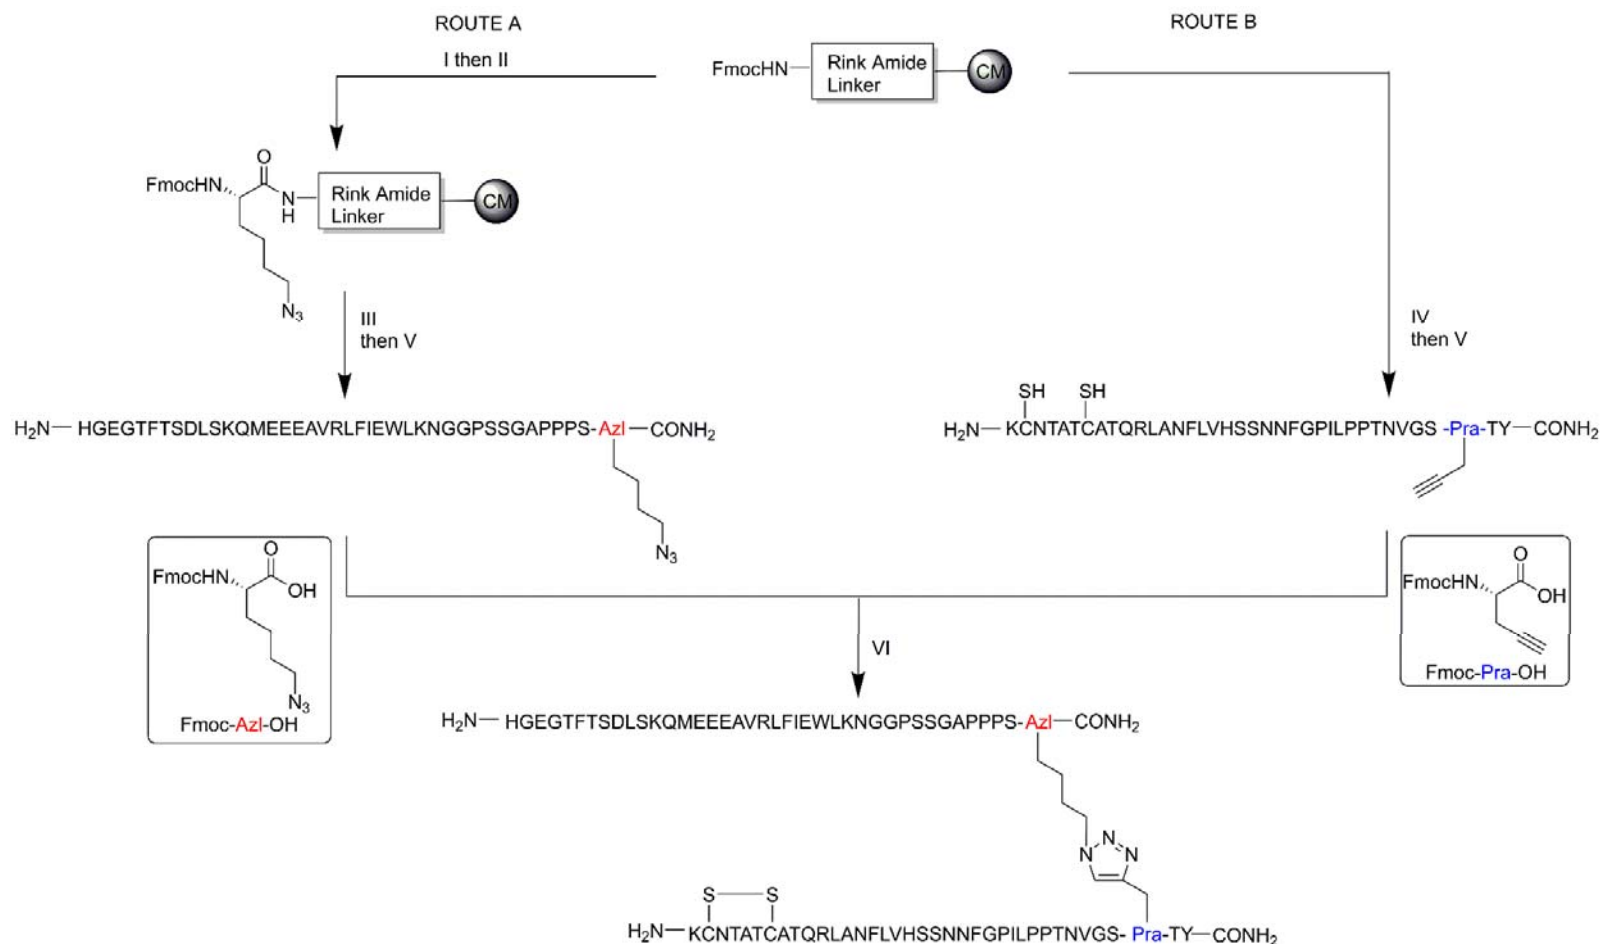

**Figure SC3.** Synthesis of a dual amylin and GLP-1 receptor agonist (DAGAR1). a) Synthesis of DAGAR1, and chemical structures of [Fmoc-Lys(N<sub>3</sub>)-OH] and Fmoc-Pra-OH building blocks. ROUTE A: Synthesis of [Lys(N<sub>3</sub>)]<sup>40</sup>-exenatide and ROUTE B: Synthesis of [Pra]<sup>35</sup>-pramlintide. Reagents and conditions: (I) 20% piperidine in DMF, rt, 2 x 5 min; (II) Fmoc-Lys(N<sub>3</sub>)-OH (2 eq.), HATU (1.9 eq.), 2,4,6-collidine (6 eq.), rt, 1 h; (III) Fmoc SPPS using Biotage initiator + Alstra peptide synthesiser. Fmoc-AA-OH coupling: Fmoc-AA-OH (5 eq.), HATU (4.5 eq.), *i*Pr<sub>2</sub>Net (10 eq.); Fmoc-deprotection: 20% piperidine in DMF; (IV) Fmoc SPPS using PS3<sup>TM</sup> peptide synthesiser. Fmoc-AA-OH coupling: Fmoc-AA-OH (5 eq.), HATU (4.5 eq.), NMM (10 eq.); Fmoc-deprotection: 20% piperidine in DMF; (V) TFA/*i*Pr<sub>3</sub>SiH/DODT/H<sub>2</sub>O (94/1/2.5/2.5, v/v); (VI) CuSO<sub>4</sub>·5H<sub>2</sub>O (0.0037 eq.), Na ascorbate (0.0037 eq.), DMSO, 80 °C, 5 min.

## 6. LCMS, RP-HPLC, and ESI-MS traces for peptides

Crude linear, and crude oxidised (Cys-2/Cys-7), and purified traces are provided for human amylin. For all other analogs, purified traces only are provided.

### 6.1. Traces for synthesis, oxidation and purification of human amylin

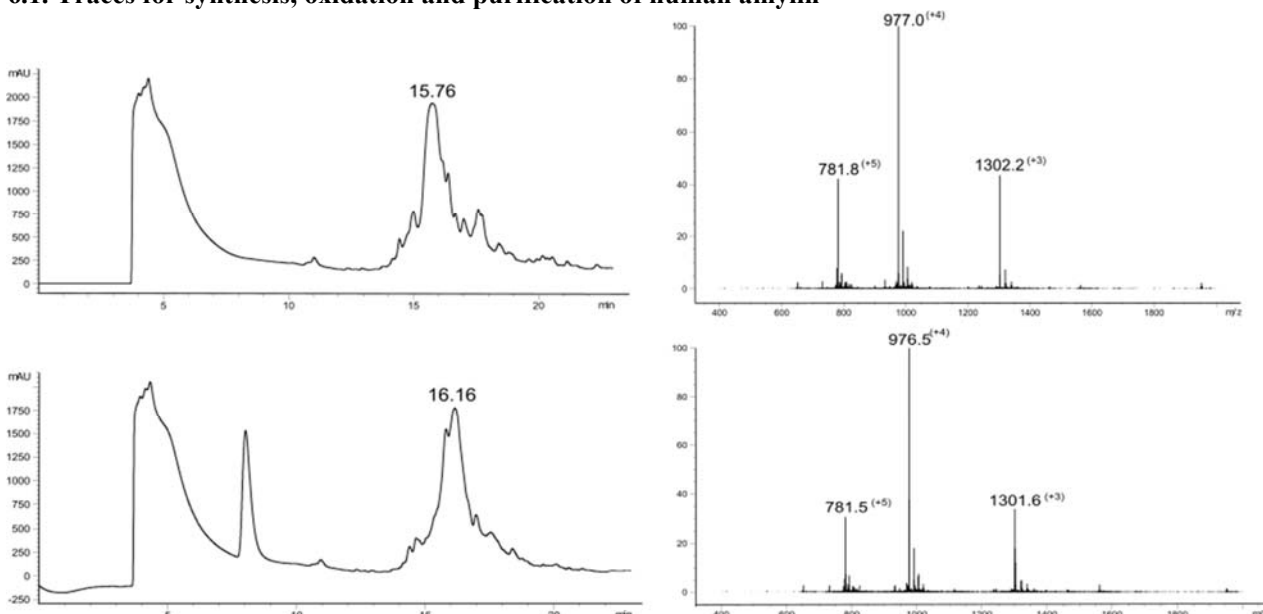

**Figure SC4:** LCMS traces for crude human amylin before oxidation (top) and after oxidation (bottom). Top *ca.* 42% as analysed by peak area of RP-HPLC at 214 nm;  $R_t$  15.76 min;  $m/z$  (ESI-MS) 977.0 ( $[M+4H]^{4+}$  requires 977.3); linear gradient of 5%B to 65%B over 20 min (*ca.* 3%B/min) at 40 °C, 0.3 mL/min. Bottom *ca.* 38% as analysed by peak area of RP-HPLC at 214 nm;  $R_t$  16.16 min;  $m/z$  (ESI-MS) 976.5 ( $[M+4H]^{4+}$  requires 976.8); linear gradient of 5%B to 65%B over 20 min (*ca.* 3%B/min) at 40 °C, 0.3 mL/min.

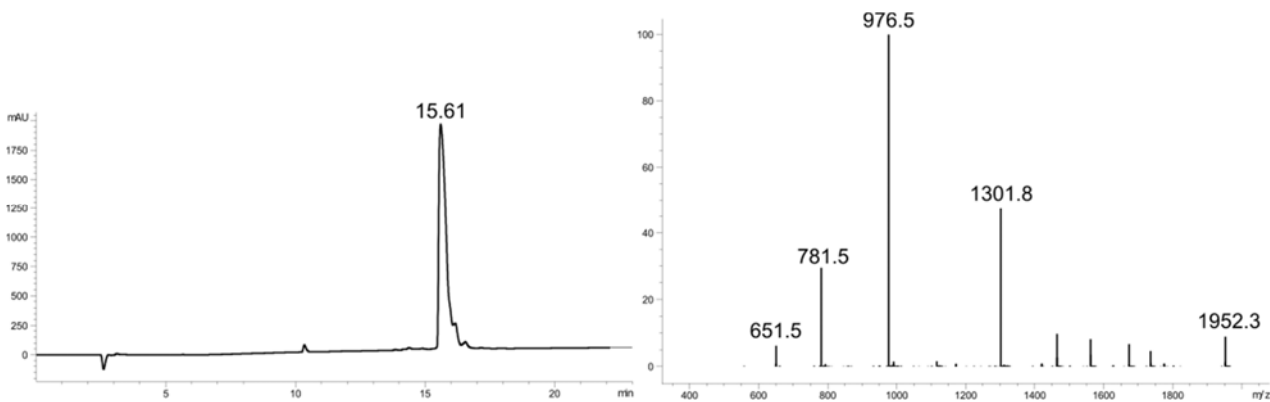

**Figure SC5:** LCMS trace of purified human amylin (95%);  $R_t$  15.61 min;  $m/z$  (ESI-MS) 976.5 ( $[M+4H]^{4+}$  requires 976.8); linear gradient of 5%B to 65%B over 60 min (*ca.* 1%B/min) at 40 °C, 0.3 mL/min.

## Purified N-terminal Analogs

### K1A

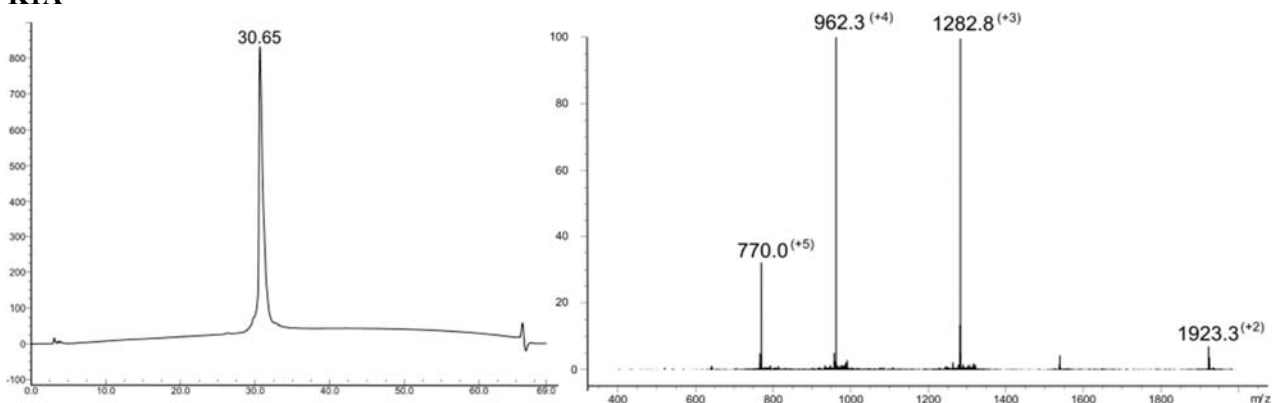

**Figure SC6:** LCMS trace of K1A analog of human amylin (96%);  $R_t$  30.65 min;  $m/z$  (ESI-MS) 962.3 ( $[M+4H]^{4+}$  requires 962.6); linear gradient of 5%B to 65%B over 60 min (*ca.* 1%B/min) at 40 °C, 0.3 mL/min.

### N3A

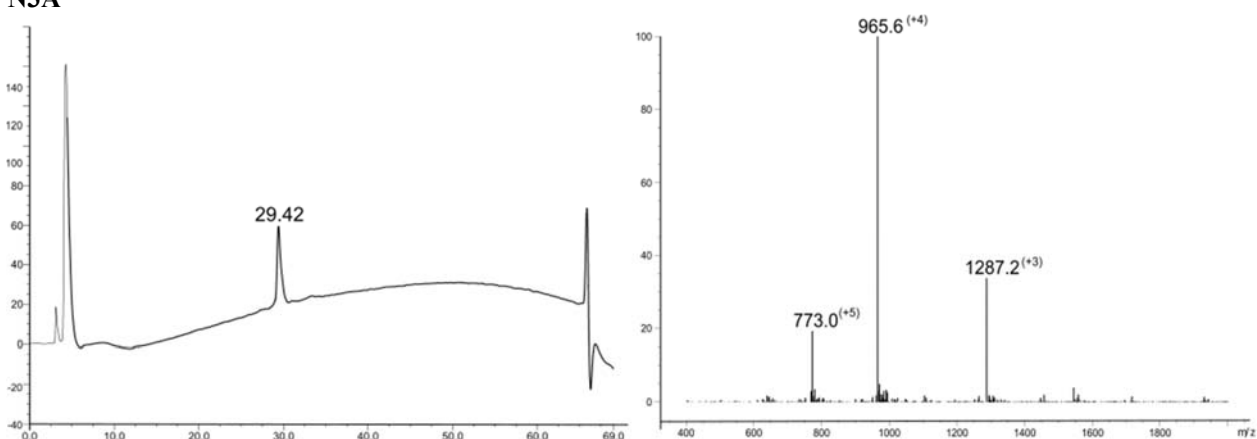

**Figure SC7:** LCMS trace of N3A analog of human amylin (98%);  $R_t$  29.42 min;  $m/z$  (ESI-MS) 965.6 ( $[M+4H]^{4+}$  requires 966.1); linear gradient of 5%B to 65%B over 60 min (*ca.* 1%B/min) at 40 °C, 0.3 mL/min. The peak at *ca.* 5 mins is attributed to the re-equilibration of the HPLC column.

### T4A

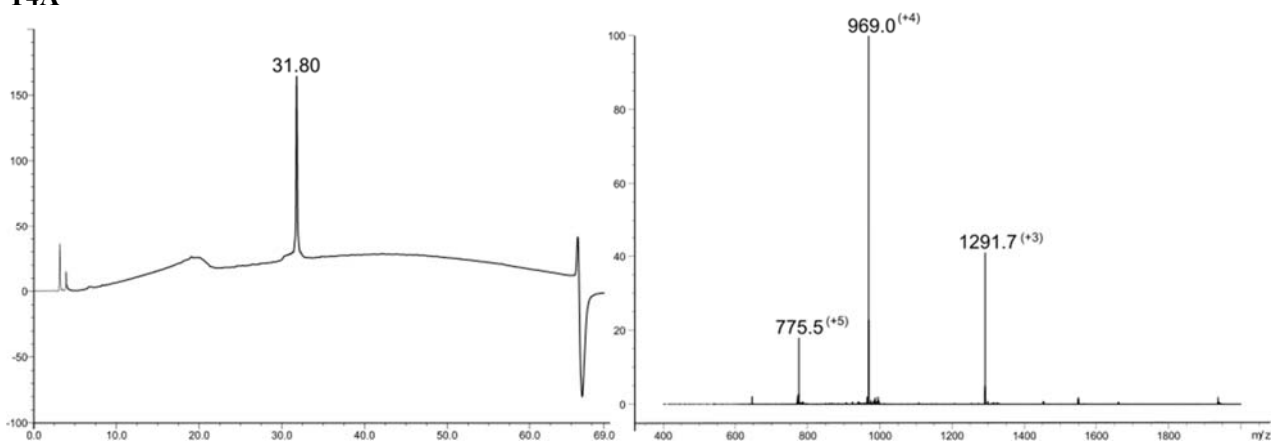

**Figure SC8:** LCMS trace of T4A analog of human amylin (92%);  $R_t$  31.80 min;  $m/z$  (ESI-MS) 969.0 ( $[M+4H]^{4+}$  requires 969.3); linear gradient of 5%B to 65%B over 60 min (*ca.* 1%B/min) at 40 °C, 0.3 mL/min.



### A5G

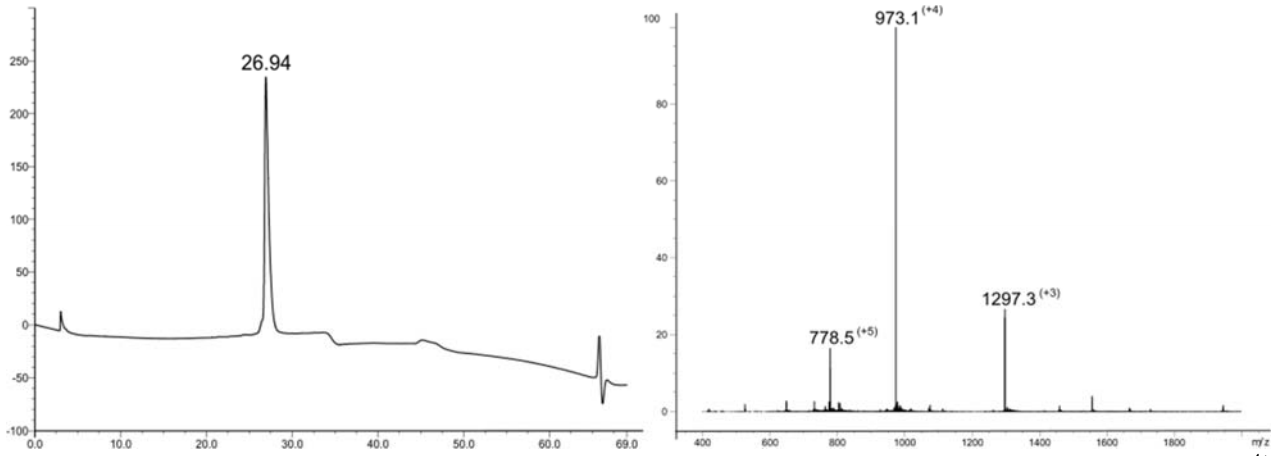

**Figure SC9:** LCMS trace of A5G analog of human amylin (96%);  $R_t$  26.94 min;  $m/z$  (ESI-MS) 973.1 ( $[M+4H]^{4+}$  requires 973.3); linear gradient of 5%B to 65%B over 60 min (*ca.* 1%B/min) at 40 °C, 0.3 mL/min.

### T6A

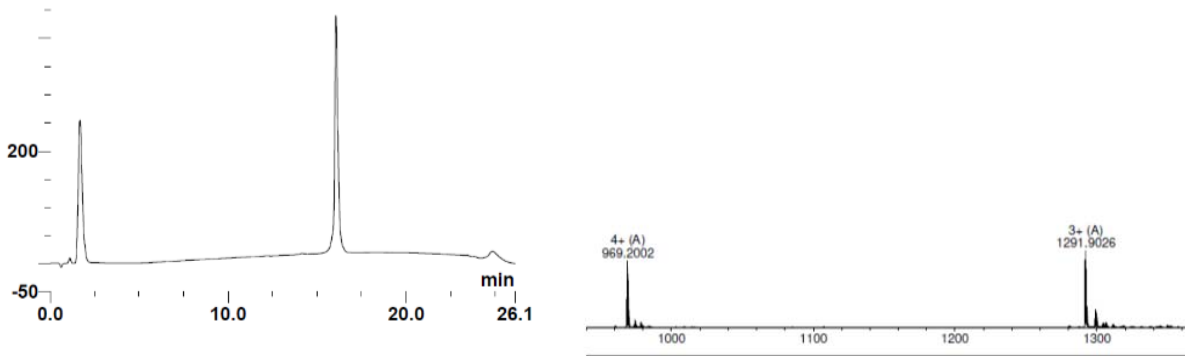

**Figure SC10:** RP-HPLC trace of T6A analog of human amylin (96%);  $R_t$  15.50 min;  $m/z$  (ESI-MS) 969.2 ( $[M+4H]^{4+}$  requires 969.3); linear gradient of 5%B to 65%B over 20 min (*ca.* 3%B/min) at 45 °C, 1 mL/min. The peak at *ca.* 2 mins is attributed to the re-equilibration of the HPLC column.

### A8G

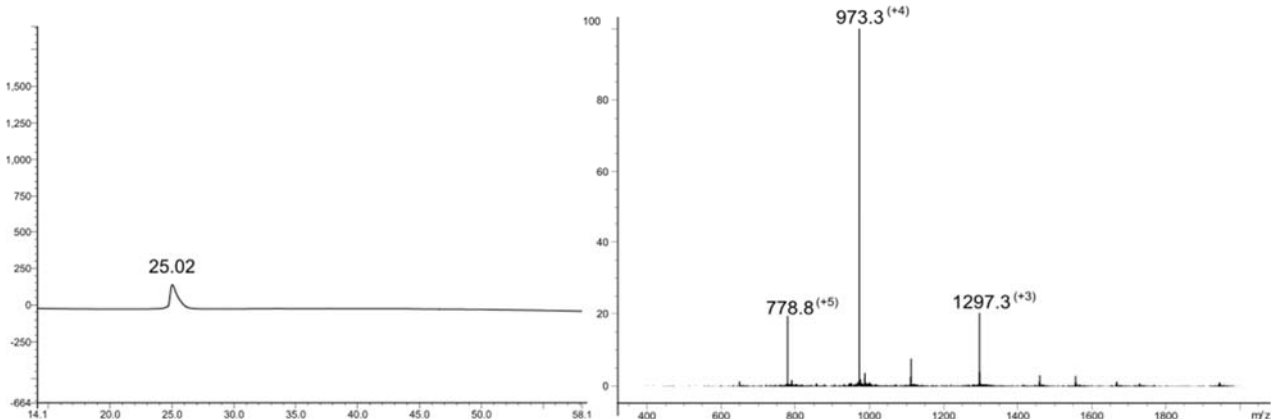

**Figure SC11:** LCMS trace of A8G analog of human amylin (96%);  $R_t$  25.02 min;  $m/z$  (ESI-MS) 973.3 ( $[M+4H]^{4+}$  requires 973.3); linear gradient of 5%B to 65%B over 60 min (*ca.* 1%B/min) at 40 °C, 0.3 mL/min.

### T9A

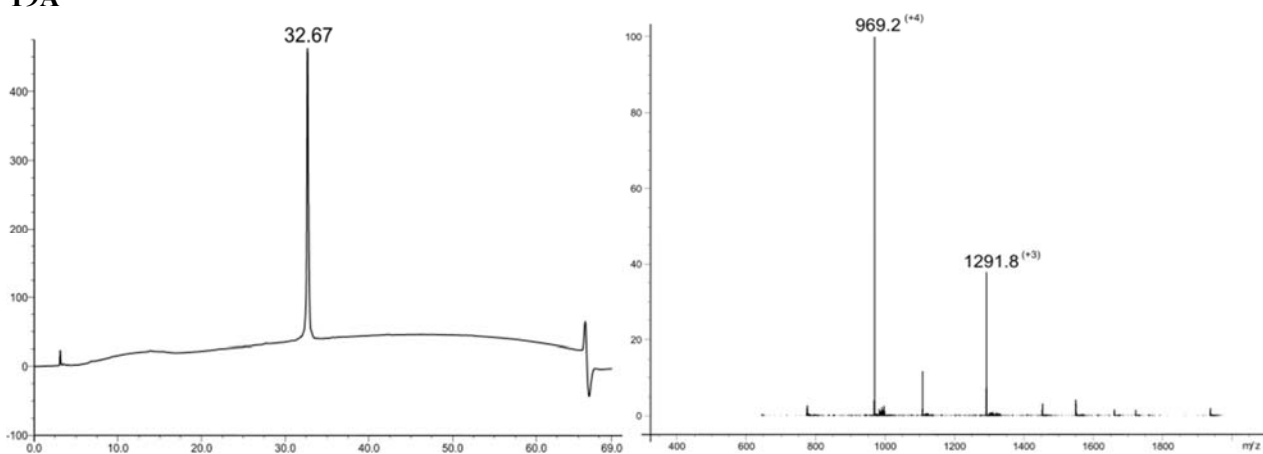

**Figure SC12:** LCMS trace of T9A analog of human amylin (96%);  $R_t$  32.67 min;  $m/z$  (ESI-MS) 969.2 ( $[M+4H]^{4+}$  requires 969.3); linear gradient of 5%B to 65%B over 60 min (ca. 1%B/min) at 40 °C, 0.3 mL/min.

### Q10A

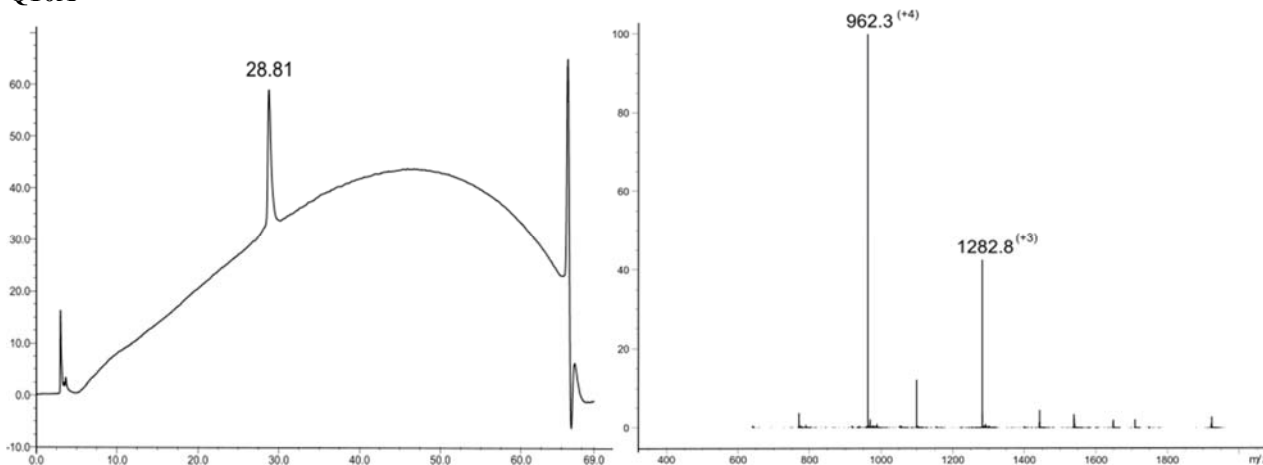

**Figure SC13:** LCMS trace of Q10A analog of human amylin (98%);  $R_t$  28.81 min;  $m/z$  (ESI-MS) 962.3 ( $[M+4H]^{4+}$  requires 962.6); linear gradient of 5%B to 65%B over 60 min (ca. 1%B/min) at 40 °C, 0.3 mL/min.

### R11A

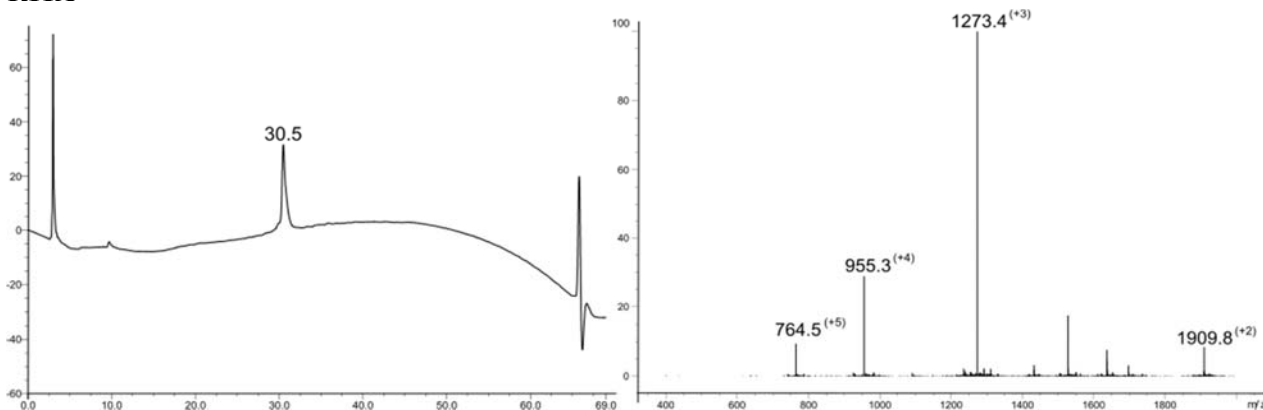

**Figure SC14:** LCMS trace of R11A analog of human amylin (91%);  $R_t$  30.5 min;  $m/z$  (ESI-MS) 955.3 ( $[M+4H]^{4+}$  requires 955.6); linear gradient of 5%B to 65%B over 60 min (ca. 1%B/min) at 40 °C, 0.3 mL/min. The peak at ca. 2 mins is attributed to the re-equilibration of the HPLC column.

### L12A

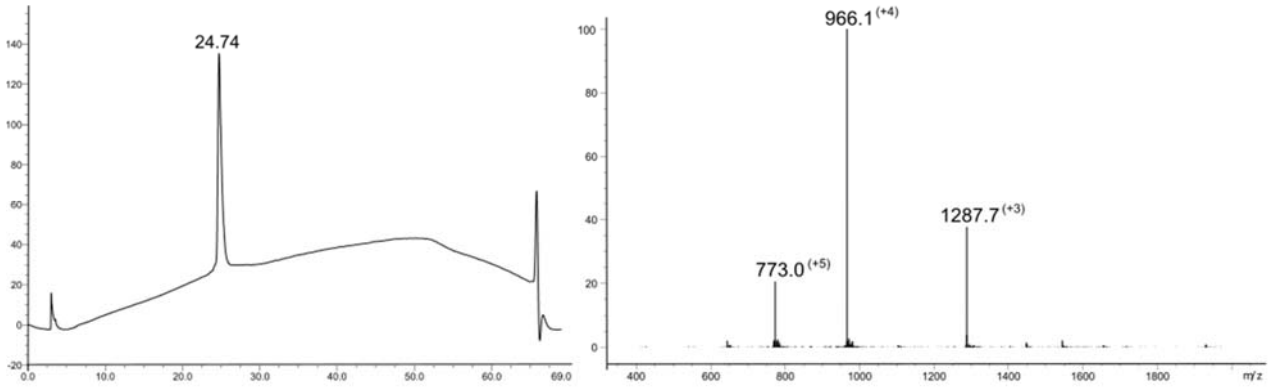

**Figure SC15:** LCMS trace of L12A analog of human amylin (98%);  $R_t$  24.74 min;  $m/z$  (ESI-MS) 966.1 ( $[M+4H]^{4+}$  requires 966.3); linear gradient of 5%B to 65%B over 60 min (*ca.* 1%B/min) at 40 °C, 0.3 mL/min.

### A13G

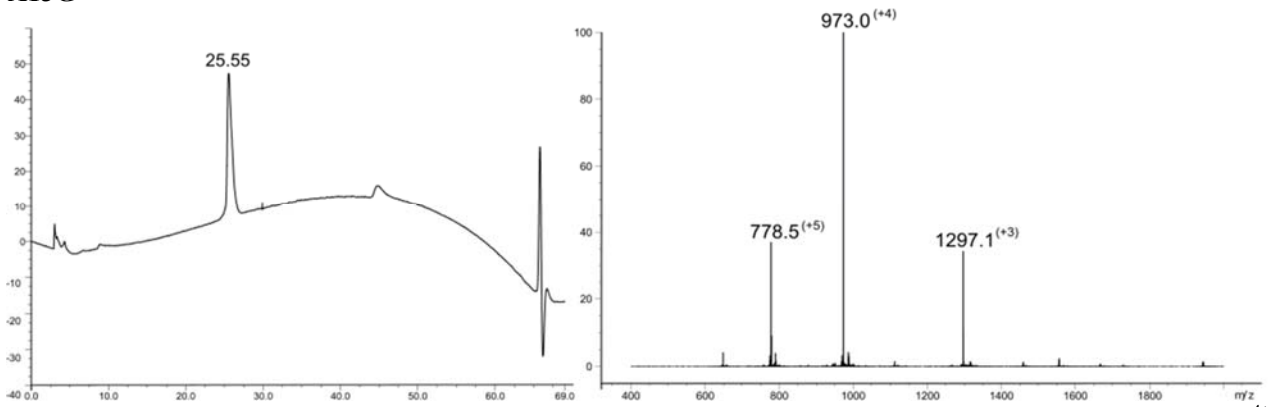

**Figure SC16:** LCMS trace of A13G analog of human amylin (93%);  $R_t$  25.55 min;  $m/z$  (ESI-MS) 973.0 ( $[M+4H]^{4+}$  requires 973.3); linear gradient of 5%B to 65%B over 60 min (*ca.* 1%B/min) at 40 °C, 0.3 mL/min.

### N14A

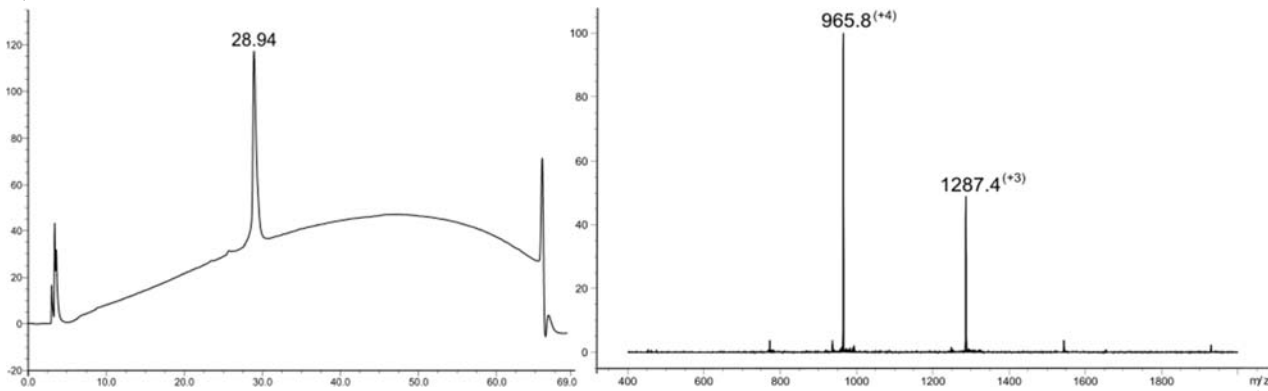

**Figure SC17:** LCMS trace of N14A analog of human amylin (98%);  $R_t$  28.94 min;  $m/z$  (ESI-MS) 965.8 ( $[M+4H]^{4+}$  requires 966.1); linear gradient of 5%B to 65%B over 60 min (*ca.* 1%B/min) at 40 °C, 0.3 mL/min.

### F15A

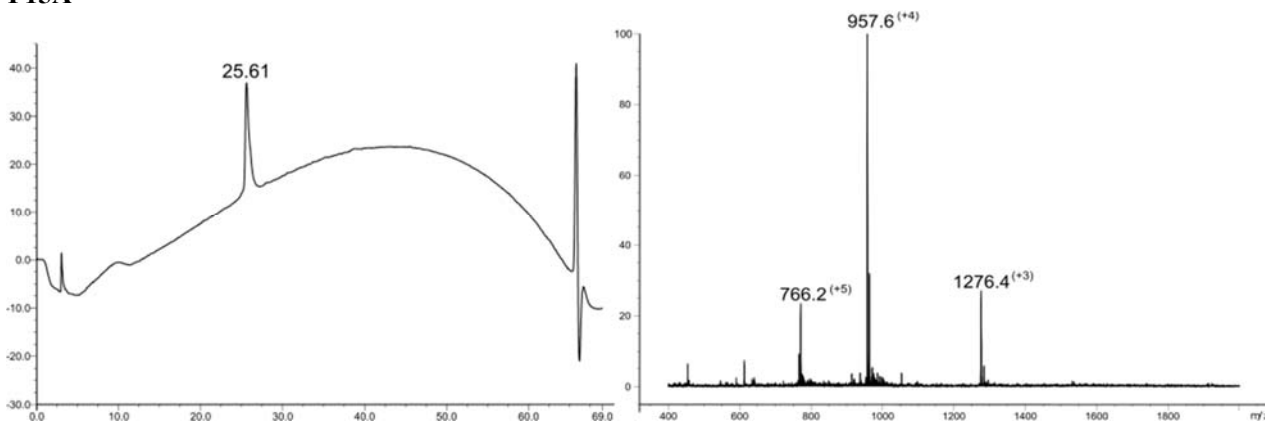

**Figure SC18:** LCMS trace of F15A analog of human amylin (97%);  $R_t$  25.61 min;  $m/z$  (ESI-MS) 957.6 ( $[M+4H]^{4+}$  requires 957.8); linear gradient of 5%B to 65%B over 60 min (*ca.* 1%B/min) at 40 °C, 0.3 mL/min.

### L16A

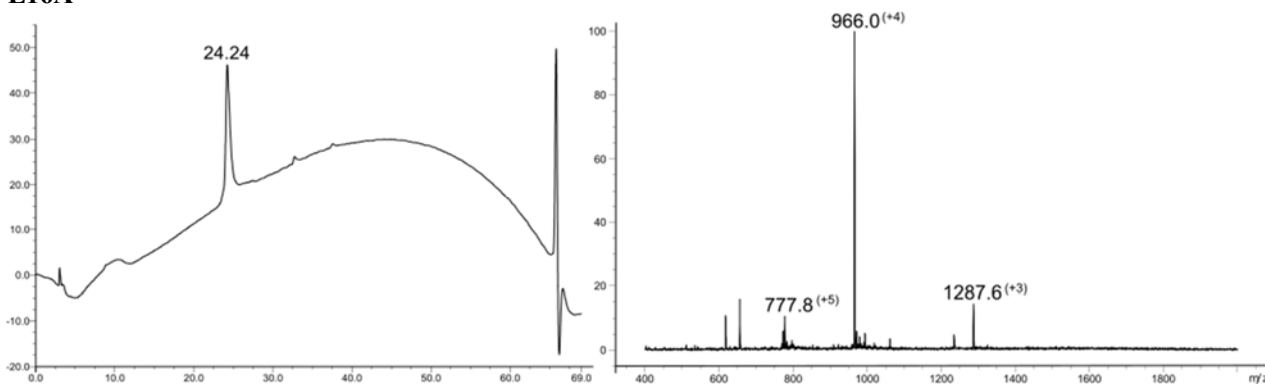

**Figure SC19:** LCMS trace of L16A analog of human amylin (97%);  $R_t$  24.24 min;  $m/z$  (ESI-MS) 966.0 ( $[M+4H]^{4+}$  requires 966.3); linear gradient of 5%B to 65%B over 60 min (*ca.* 1%B/min) at 40 °C, 0.3 mL/min.

### V17A

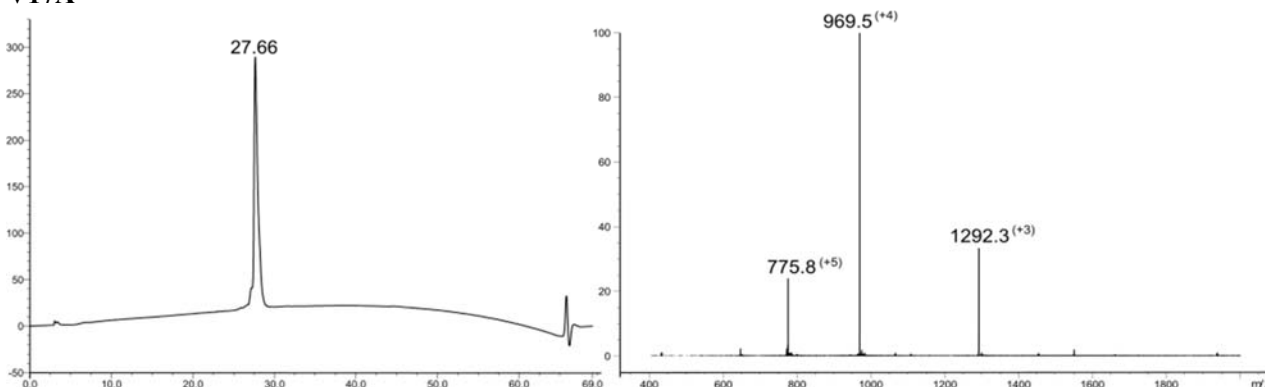

**Figure SC20:** LCMS trace of V17A analog of human amylin (96%);  $R_t$  27.66 min;  $m/z$  (ESI-MS) 969.5 ( $[M+4H]^{4+}$  requires 969.8); linear gradient of 5%B to 65%B over 60 min (*ca.* 1%B/min) at 40 °C, 0.3 mL/min.

**Purified N-terminal Loop Analogs**  
**C2S-C7S human amylin**

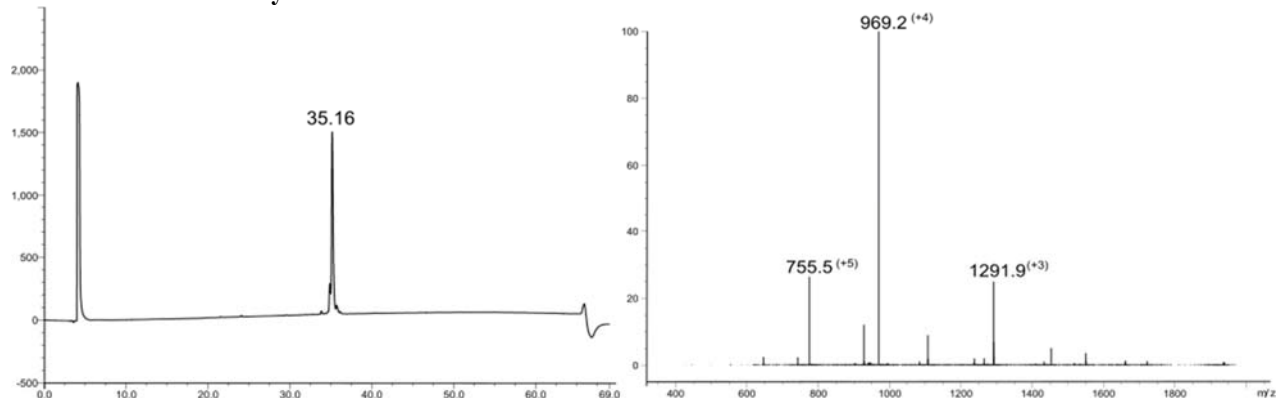

**Figure SC21:** LCMS trace of C2S-C7S analog of human amylin (90%);  $R_t$  35.16 min;  $m/z$  (ESI-MS) 969.2 ( $[M+4H]^{4+}$  requires 969.3); linear gradient of 5%B to 65%B over 60 min (*ca.* 1%B/min) at 40 °C, 0.3 mL/min. The peak at *ca.* 5 mins is attributed to the re-equilibration of the HPLC column.

**CAM-human amylin**

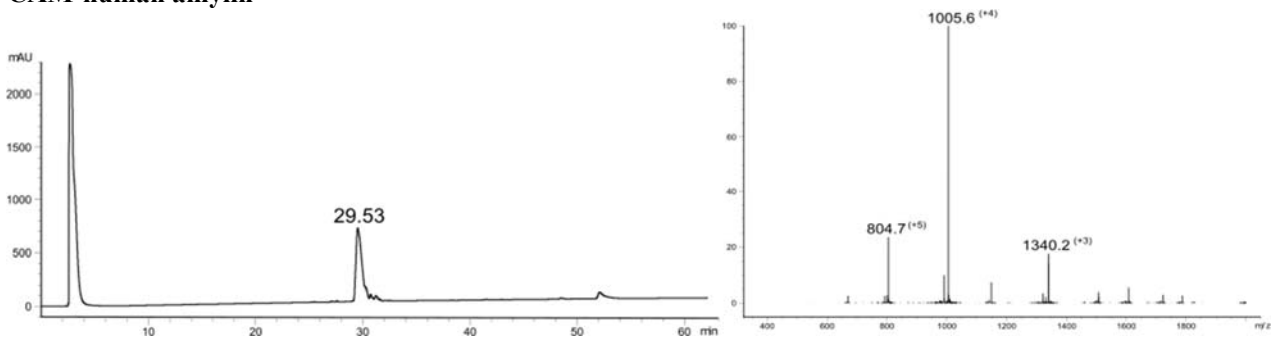

**Figure SC22:** LCMS trace of CAM-human amylin (93%);  $R_t$  29.53 min;  $m/z$  (ESI-MS) 1005.6 ( $[M+4H]^{4+}$  requires 1005.9); linear gradient of 5%B to 65%B over 60 min (*ca.* 1%B/min) at 40 °C, 0.3 mL/min. The peak at *ca.* 5 mins is attributed to the re-equilibration of the HPLC column.

**Human amylin<sub>8-37</sub>**

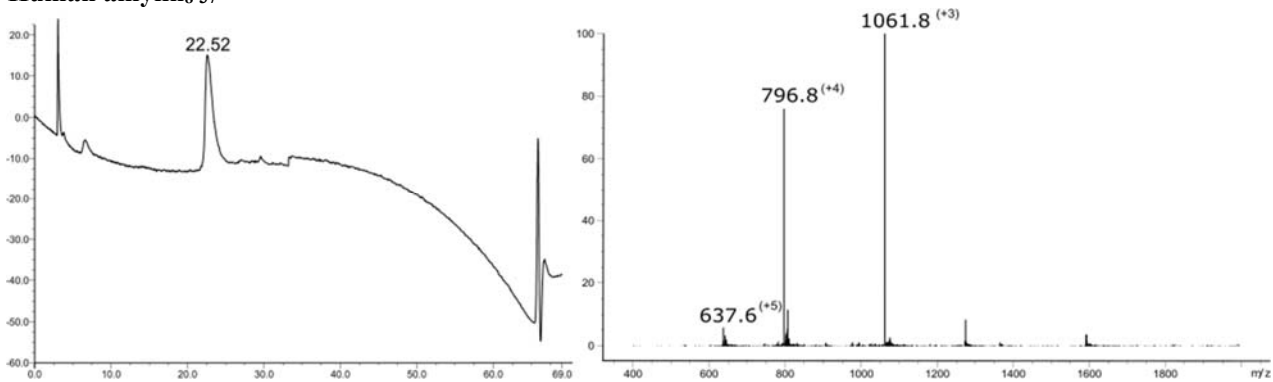

**Figure SC23:** LCMS trace of 8-37 fragment of human amylin (85%)  $R_t$  22.52 min;  $m/z$  (ESI-MS) 796.8 ( $[M+4H]^{4+}$  requires 796.9); linear gradient of 5%B to 65%B over 60 min (*ca.* 1%B/min) at 40 °C, 0.3 mL/min. The peak at *ca.* 2 mins is attributed to the re-equilibration of the HPLC column.

### Human amylin<sub>8-37</sub>(DR)

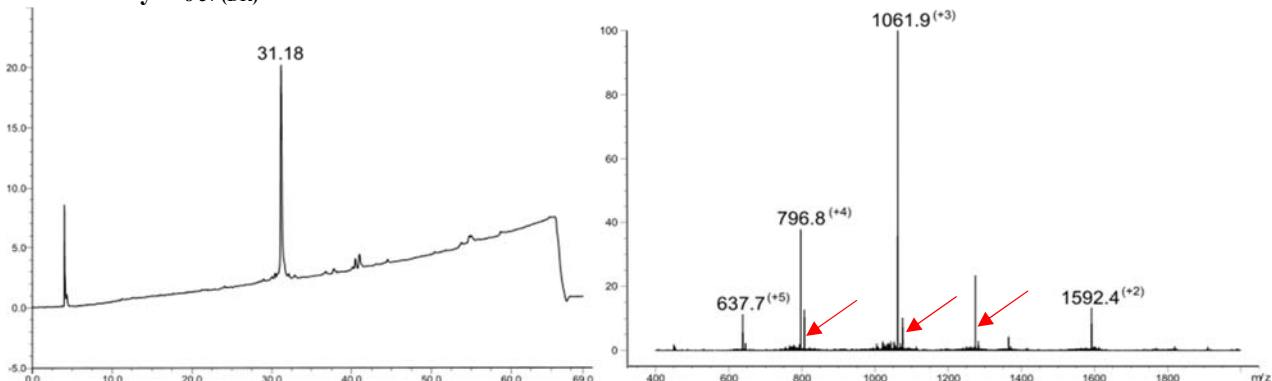

**Figure SC24:** LCMS trace of 8-37(DR) fragment of human amylin (83%)  $R_t$  31.18 min;  $m/z$  (ESI-MS) 796.8 ( $[M+4H]^{4+}$  requires 796.9); linear gradient of 5%B to 65%B over 60 min (*ca.* 1%B/min) at 40 °C, 0.3 mL/min. The peak at *ca.* 5 mins is attributed to the re-equilibration of the HPLC column.

There is a caveat regarding the purity of the two 8-37 peptides. Within the main peak an additional species eluted with the same retention time as 8-37, indicated by red arrows in the ESI-MS trace for 8-37(DR). This could not be removed by HPLC purification.

### Human amylin<sub>Ac8-37</sub>(DR)

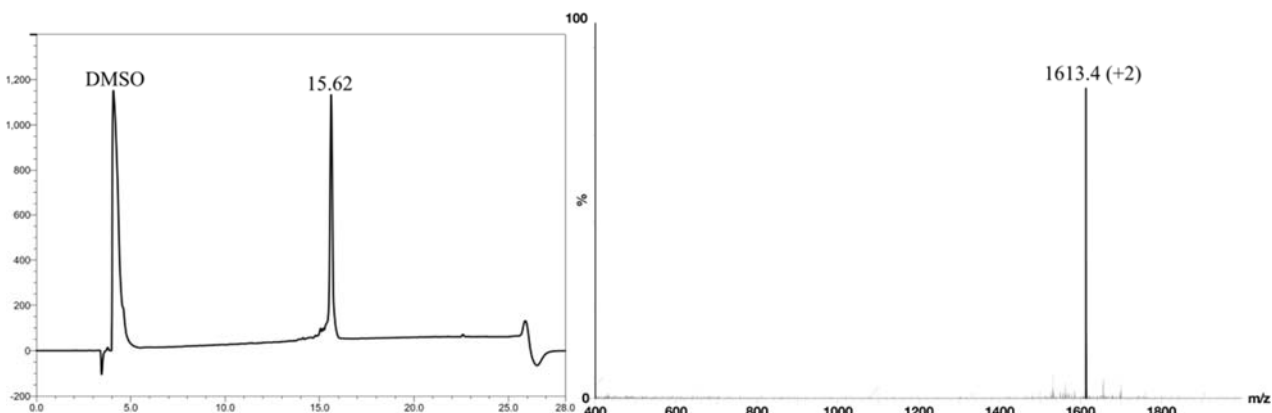

**Figure SC25:** LCMS trace of Ac8-37 (DR) human amylin (97%)  $R_t$  15.62 min;  $m/z$  (ESI-MS) 1613.4 ( $[M+2H]^{2+}$  requires 1614.8); linear gradient of 5%B to 65%B over 20 min (*ca.* 3%B/min) at 40 °C, 1 mL/min.

### Human amylin<sub>1-17</sub>

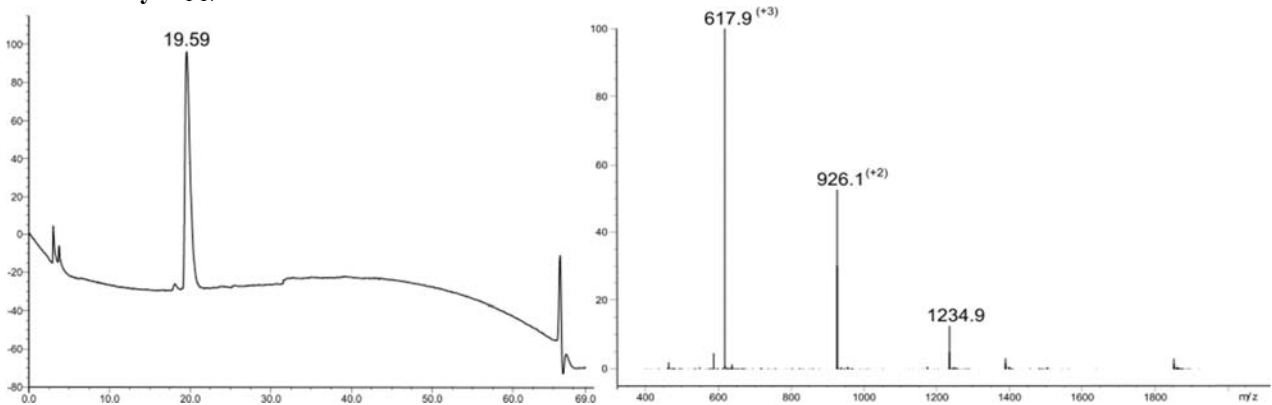

**Figure SC26:** LCMS trace of 1-17 fragment of human amylin (99%);  $R_t$  19.59 min;  $m/z$  (ESI-MS) 926.1 ( $[M+2H]^{2+}$  requires 926.6); linear gradient of 5%B to 65%B over 60 min (*ca.* 1%B/min) at 40 °C, 0.3 mL/min.

**Purified Additional N-terminal Analogs**  
**PramQ10A**

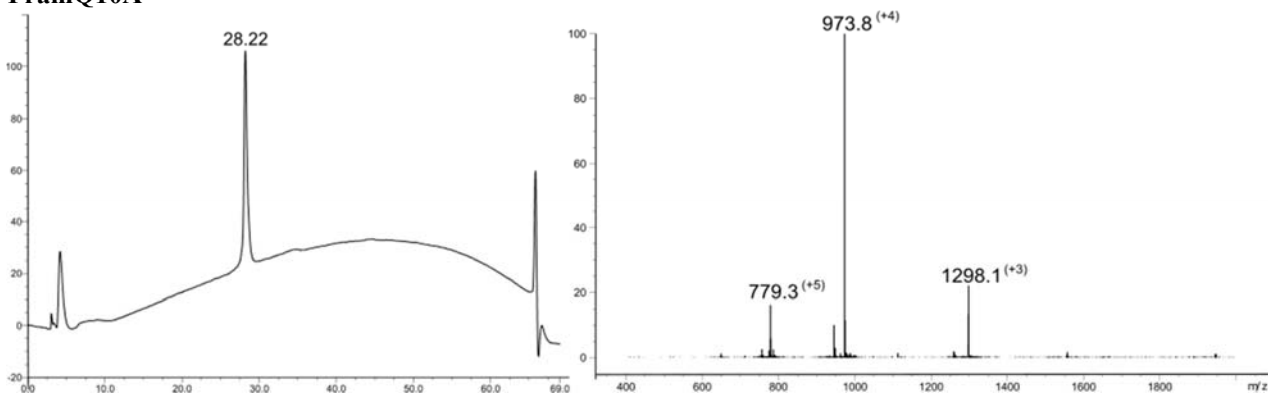

**Figure SC27:** LCMS trace of Q10A analog of pramlintide (99%);  $R_t$  28.22 min;  $m/z$  (ESI-MS) 973.8 ( $[M+4H]^{4+}$  requires 974.1); linear gradient of 5%B to 65%B over 60 min (*ca.* 1%B/min) at 40 °C, 0.3 mL/min. The peak at *ca.* 5 mins is attributed to the re-equilibration of the HPLC column.

**A5S**

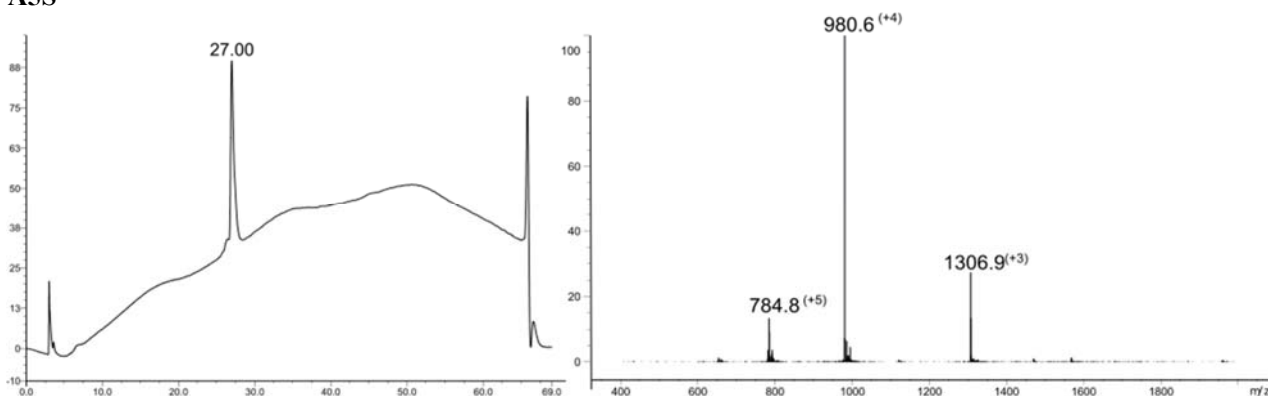

**Figure SC28:** LCMS trace of A5S analog of human amylin (95%);  $R_t$  27.00 min;  $m/z$  (ESI-MS) 980.6 ( $[M+4H]^{4+}$  requires 980.8); linear gradient of 5%B to 65%B over 60 min (*ca.* 1%B/min) at 40 °C, 0.3 mL/min.

**Purified C-terminal Analogs**  
**I26A**

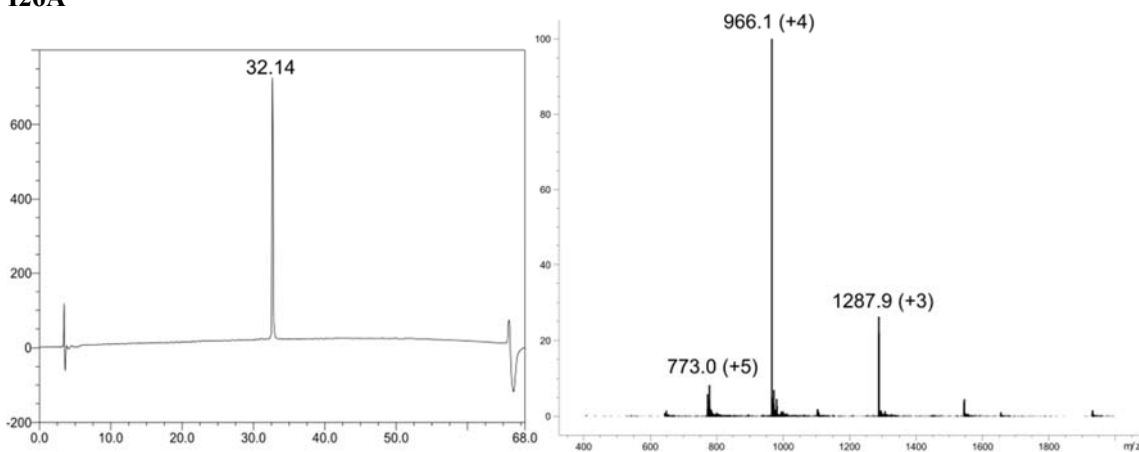

**Figure SC29:** RP-HPLC trace of I26A analog of human amylin (99%);  $R_t$  32.14 min;  $m/z$  (ESI-MS) 966.1 ( $[M+4H]^{4+}$  requires 966.3); linear gradient of 5%B to 65%B over 60 min (*ca.* 1%B/min) at 45 °C, 1 mL/min.

**L27A**

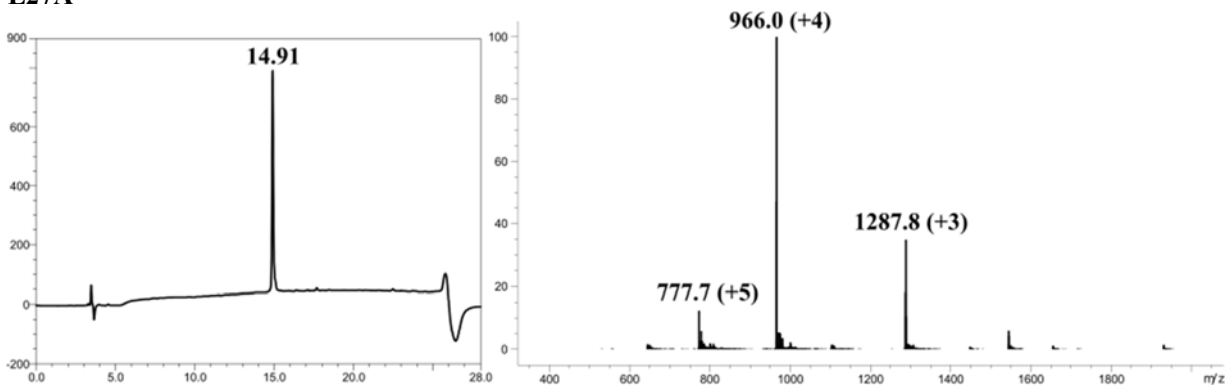

**Figure SC30:** RP-HPLC trace of L27A analog of human amylin (98%);  $R_t$  14.91 min;  $m/z$  (ESI-MS) 966.0 ( $[M+4H]^{4+}$  requires 966.3); linear gradient of 5%B to 65%B over 20 min (*ca.* 3%B/min) at 45 °C, 1 mL/min.

**S28A**

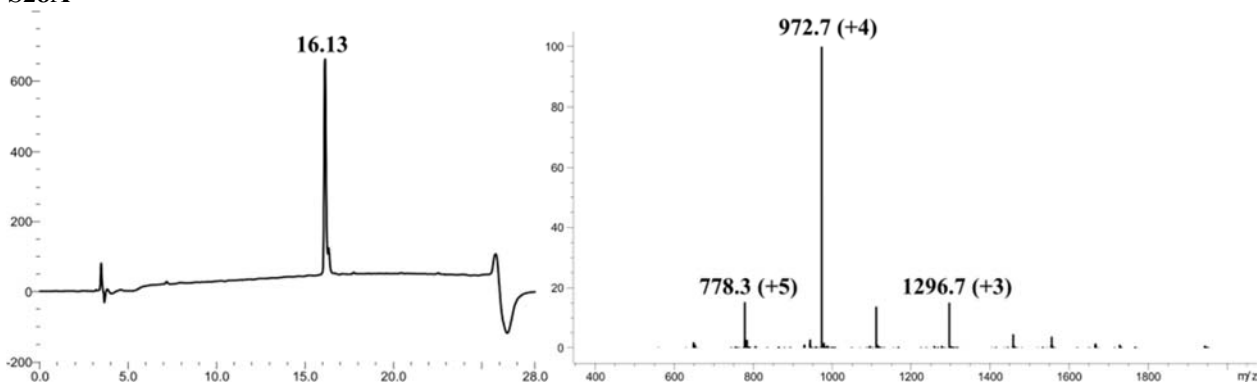

**Figure SC31:** RP-HPLC trace of S28A analog of human amylin (94%);  $R_t$  16.13 min;  $m/z$  (ESI-MS) 972.7 ( $[M+4H]^{4+}$  requires 972.8); linear gradient of 5%B to 65%B over 20 min (*ca.* 3%B/min) at 45 °C, 1 mL/min.



### S29A

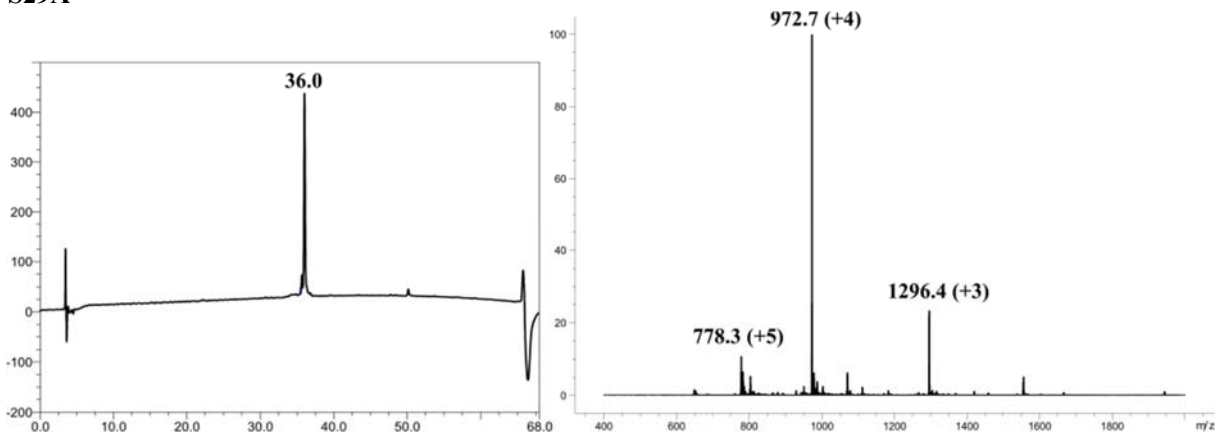

**Figure SC32:** RP-HPLC trace of S29A analog of human amylin (95%);  $R_t$  36.0 min;  $m/z$  (ESI-MS) 972.7 ( $[M+4H]^{4+}$  requires 972.8); linear gradient of 5%B to 65%B over 60 min (*ca.* 1%B/min) at 45 °C, 1 mL/min.

### T30A

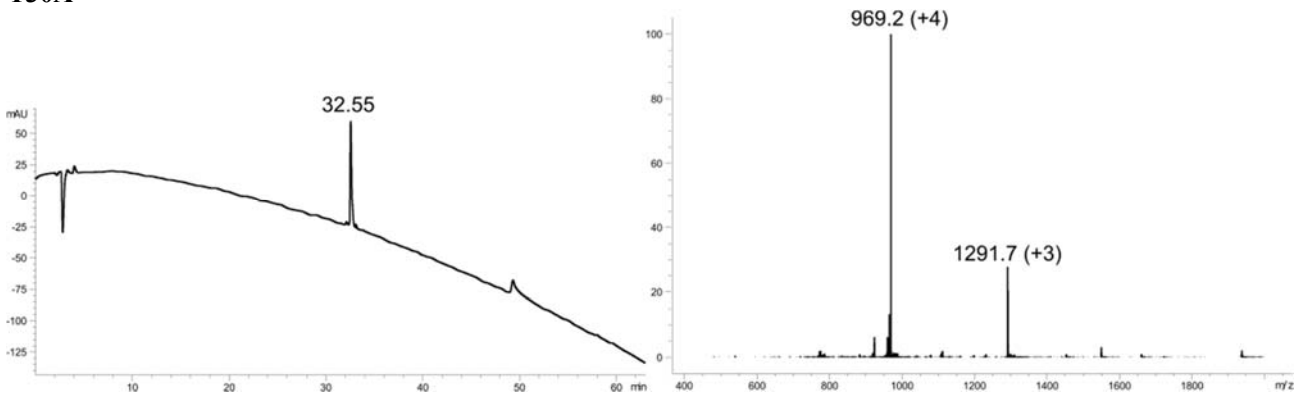

**Figure SC33:** LCMS trace of T30A analog of human amylin (94%);  $R_t$  32.55 min;  $m/z$  (ESI-MS) 969.2 ( $[M+4H]^{4+}$  requires 969.3); linear gradient of 5%B to 65%B over 60 min (*ca.* 1%B/min) at 40 °C, 0.3 mL/min.

### N31A

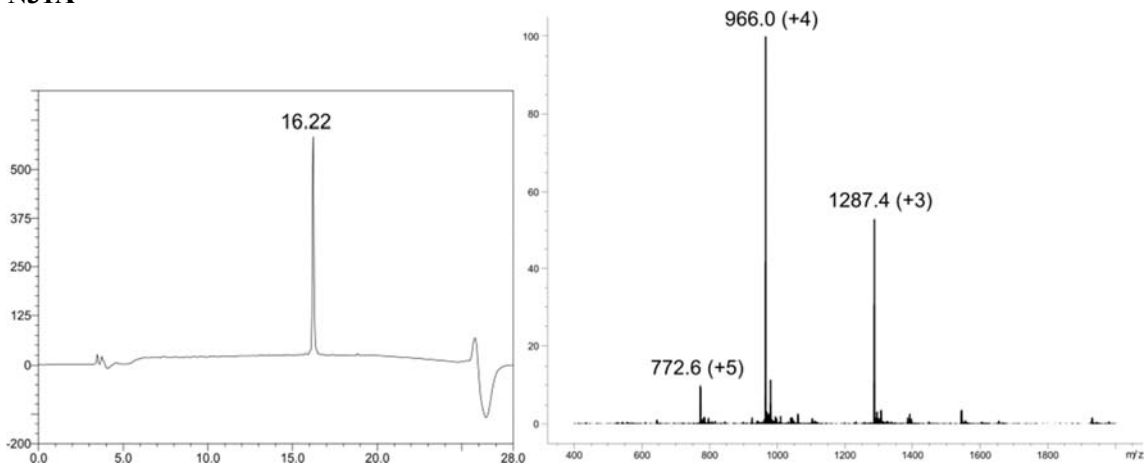

**Figure SC34:** RP-HPLC trace of N31A analog of human amylin (97%);  $R_t$  16.22 min;  $m/z$  (ESI-MS) 966.0 ( $[M+4H]^{4+}$  requires 966.1); linear gradient of 5%B to 65%B over 20 min (*ca.* 3%B/min) at 45 °C, 1 mL/min.

### V32A

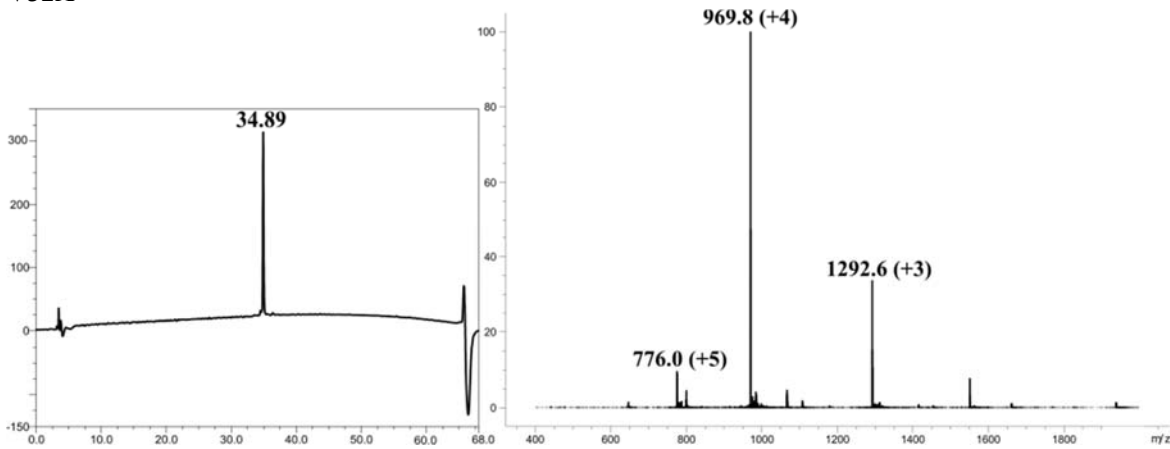

**Figure SC35:** RP-HPLC trace of V32A analog of human amylin (96%);  $R_t$  34.89 min;  $m/z$  (ESI-MS) 969.8 ( $[M+4H]^{4+}$  requires 969.8); linear gradient of 5%B to 65%B over 60 min (*ca.* 1%B/min) at 45 °C, 1 mL/min.

### G33A

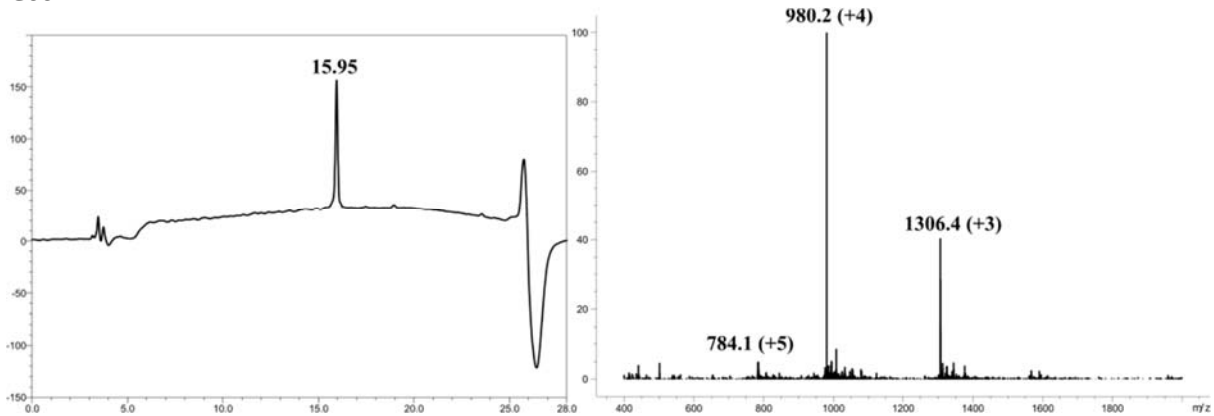

**Figure SC36:** RP-HPLC trace of G33A analog of human amylin (98%);  $R_t$  15.95 min;  $m/z$  (ESI-MS) 980.2 ( $[M+4H]^{4+}$  requires 980.3); linear gradient of 5%B to 65%B over 20 min (*ca.* 3%B/min) at 45 °C, 1 mL/min.

### S34A

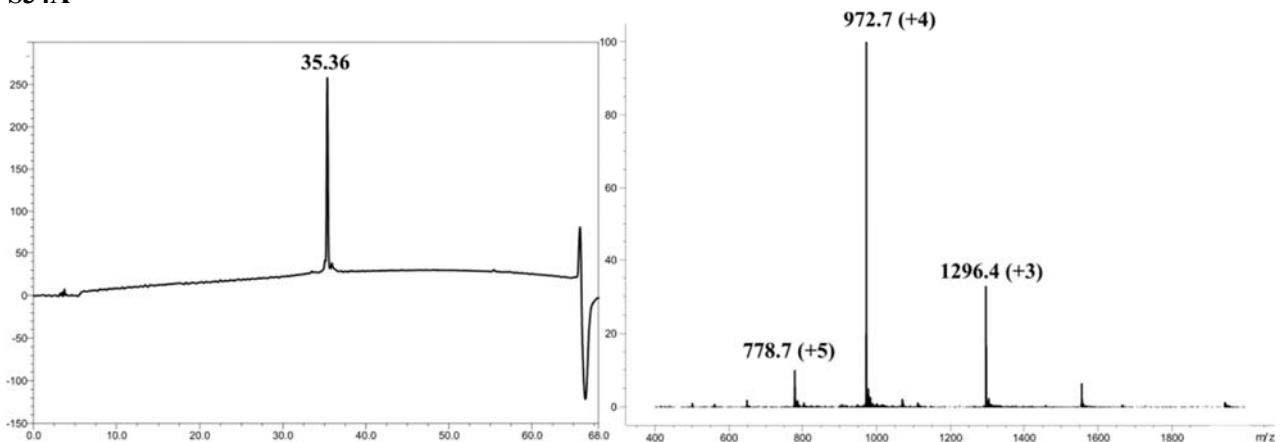

**Figure SC37:** RP-HPLC trace of S34A analog of human amylin (94%);  $R_t$  35.36 min;  $m/z$  (ESI-MS) 972.7 ( $[M+4H]^{4+}$  requires 972.8); linear gradient of 5%B to 65%B over 60 min (*ca.* 1%B/min) at 45 °C, 1 mL/min.

### N35A

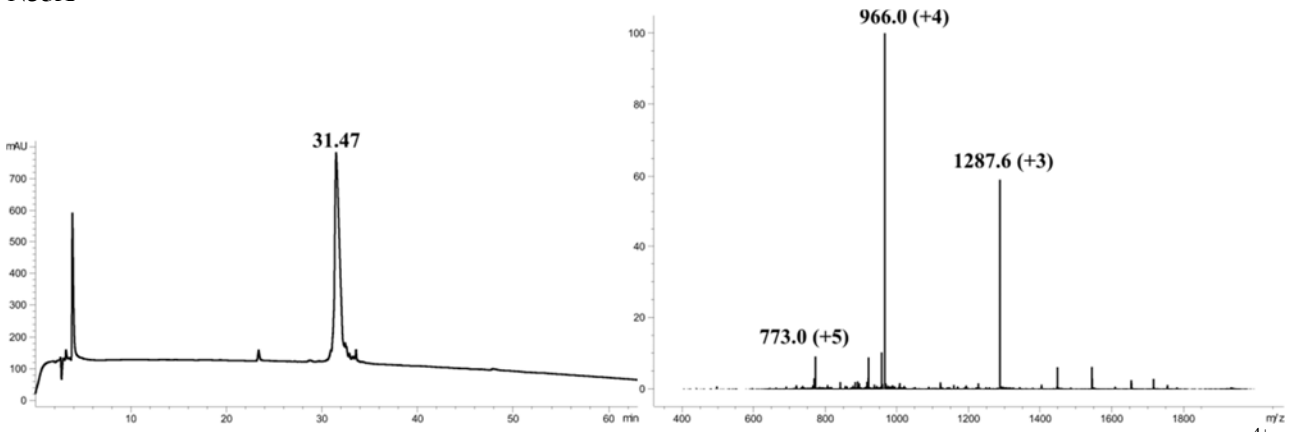

**Figure SC38:** LCMS trace of N35A analog of human amylin (94%);  $R_t$  31.47 min;  $m/z$  (ESI-MS) 966.0 ( $[M+4H]^{4+}$  requires 966.1); linear gradient of 5%B to 65%B over 60 min (*ca.* 1%B/min) at 40 °C, 0.3 mL/min.

### T36A

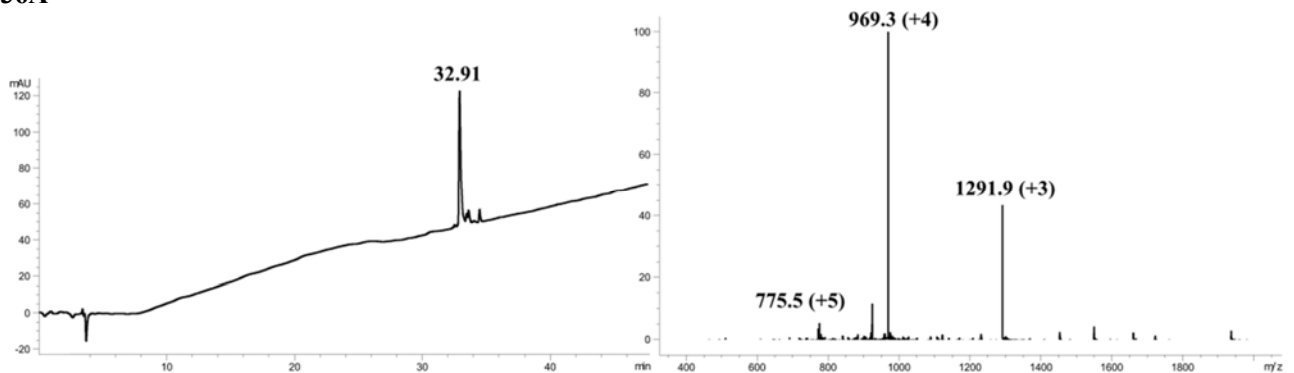

**Figure SC39:** LCMS trace of T36A analog of human amylin (93%);  $R_t$  32.91 min;  $m/z$  (ESI-MS) 969.3 ( $[M+4H]^{4+}$  requires 969.3); linear gradient of 5%B to 65%B over 60 min (*ca.* 1%B/min) at 40 °C, 0.3 mL/min.

### Y37A

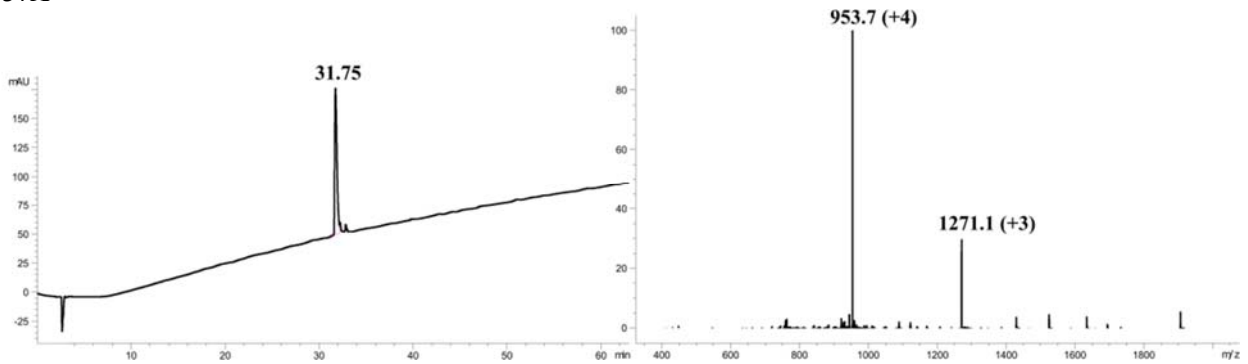

**Figure SC40:** LCMS trace of Y37A analog of human amylin (98%);  $R_t$  31.75 min;  $m/z$  (ESI-MS) 953.7 ( $[M+4H]^{4+}$  requires 953.8); linear gradient of 5%B to 65%B over 60 min (*ca.* 1%B/min) at 40 °C, 0.3 mL/min.

## Human amylin-COOH

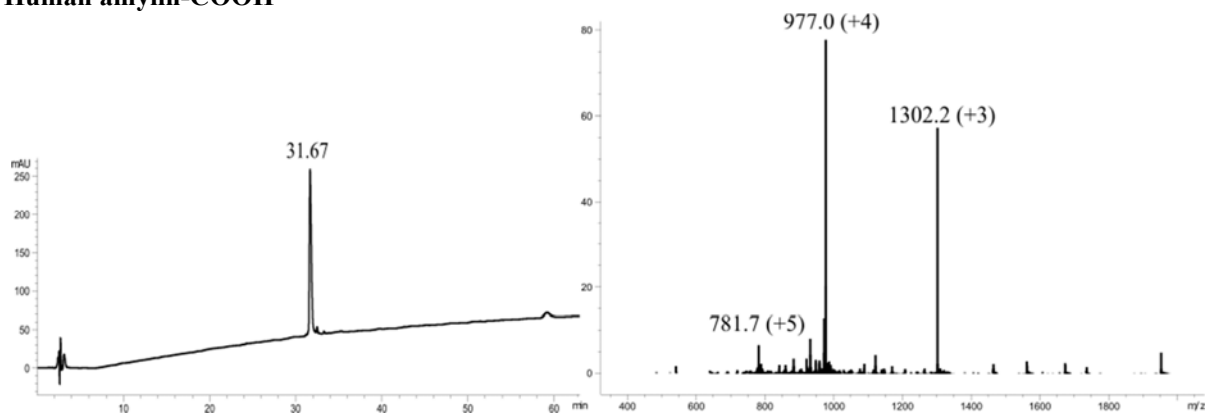

**Figure SC41:** LCMS trace of -COOH analog of human amylin (99%);  $R_t$  31.67 min;  $m/z$  (ESI-MS) 977.0 ( $[M+4H]^{4+}$  requires 977.1); linear gradient of 5%B to 65%B over 60 min (*ca.* 1%B/min) at 40 °C, 0.3 mL/min.

**Purified human CGRP, calcitonin and amylin C-terminal exchanges/Analog  
CGRP**

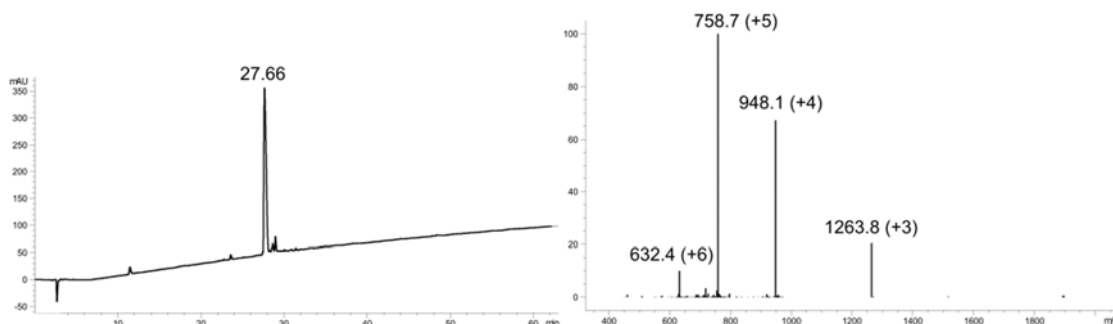

**Figure SC42:** LCMS trace of h $\alpha$ CGRP (97%);  $R_t$  27.66 min;  $m/z$  (ESI-MS) 948.1 ( $[M+4H]^{4+}$  requires 948.3); linear gradient of 5%B to 65%B over 60 min (*ca.* 1%B/min) at 40 °C, 0.3 mL/min.

**CGRP F37Y**

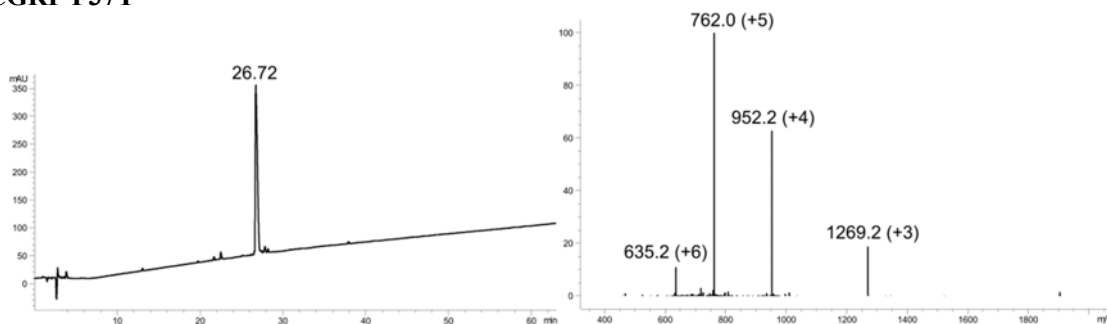

**Figure SC43:** LCMS trace of F37Y analog of h $\alpha$ CGRP (96%);  $R_t$  26.72 min;  $m/z$  (ESI-MS) 952.2 ( $[M+4H]^{4+}$  requires 952.3); linear gradient of 5%B to 65%B over 60 min (*ca.* 1%B/min) at 40 °C, 0.3 mL/min.

**Human amylin Y37F**

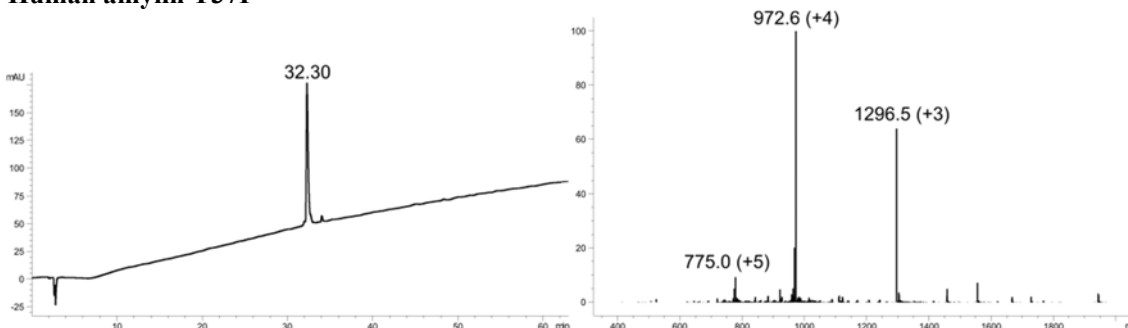

**Figure SC44:** LCMS trace of Y37F analog of human amylin (99%);  $R_t$  32.30 min;  $m/z$  (ESI-MS) 972.6 ( $[M+4H]^{4+}$  requires 972.8); linear gradient of 5%B to 65%B over 60 min (*ca.* 1%B/min) at 40 °C, 0.3 mL/min.

### Human amylin Y37P

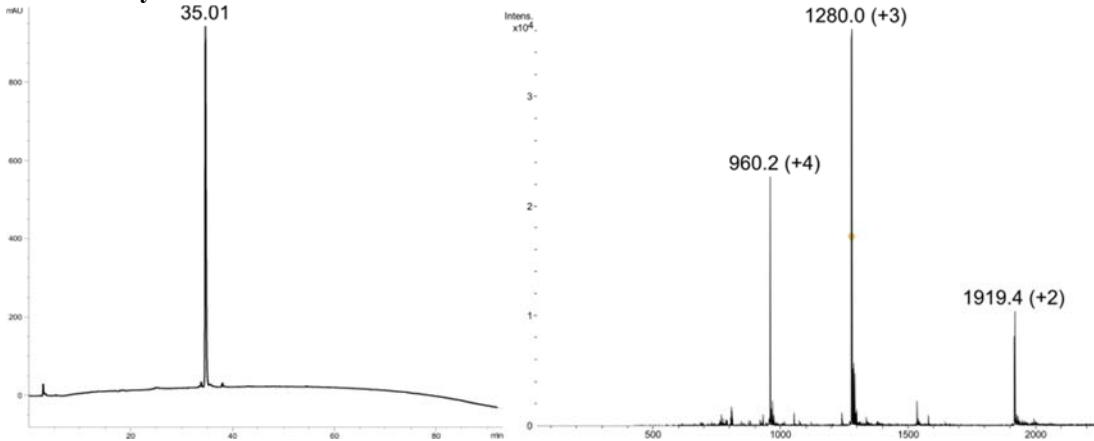

**Figure SC45:** RP-HPLC trace of Y37P analog of human amylin (95%);  $R_t$  35.01 min;  $m/z$  (ESI-MS) 1280.0 ( $[M+3H]^{3+}$  requires 1280.2); linear gradient of 5%B to 65%B over 60 min (*ca.* 1%B/min) at 45 °C, 1 mL/min.

### Human calcitonin

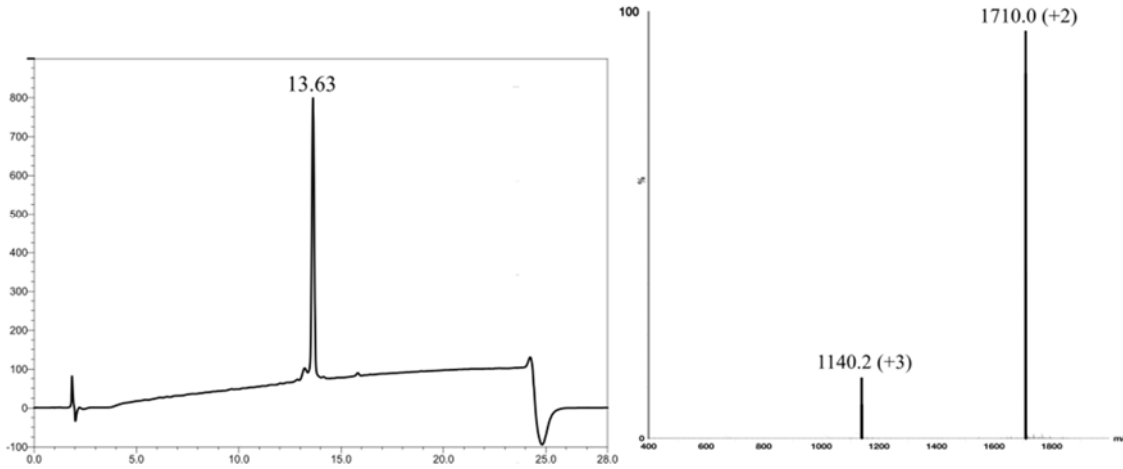

**Figure SC46:** RP-HPLC trace of human calcitonin (95%);  $R_t$  13.63 min;  $m/z$  (ESI-MS) 1710.0 ( $[M+2H]^{2+}$  requires 1709.9); linear gradient of 5%B to 65%B over 20 min (*ca.* 3%B/min) at 45 °C, 1 mL/min.

### Human calcitonin P32Y

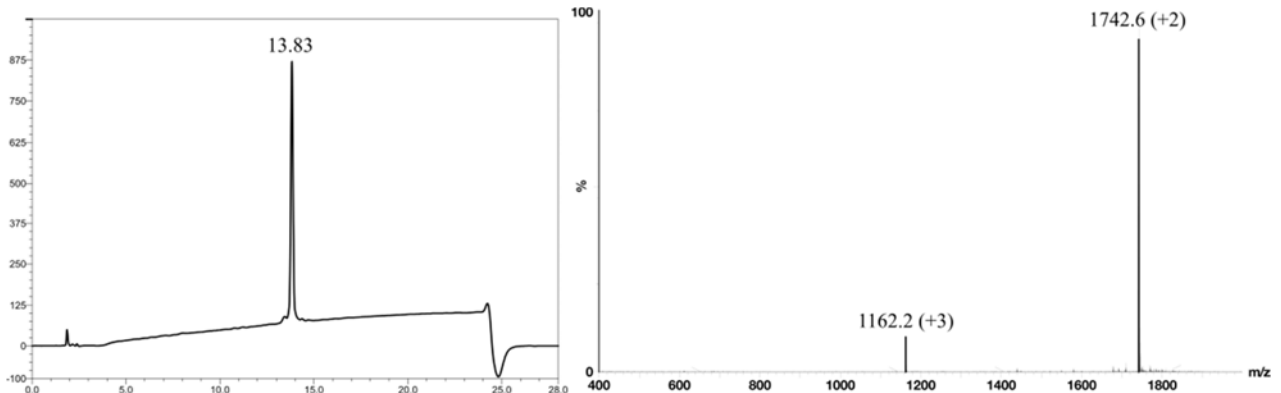

**Figure SC47:** RP-HPLC trace of P32Y analog of human calcitonin (96%);  $R_t$  13.83 min;  $m/z$  (ESI-MS) 1742.6 ( $[M+2H]^{2+}$  requires 1742.9); linear gradient of 5%B to 65%B over 20 min (*ca.* 3%B/min) at 45 °C, 1 mL/min.

## Purified DAGAR1

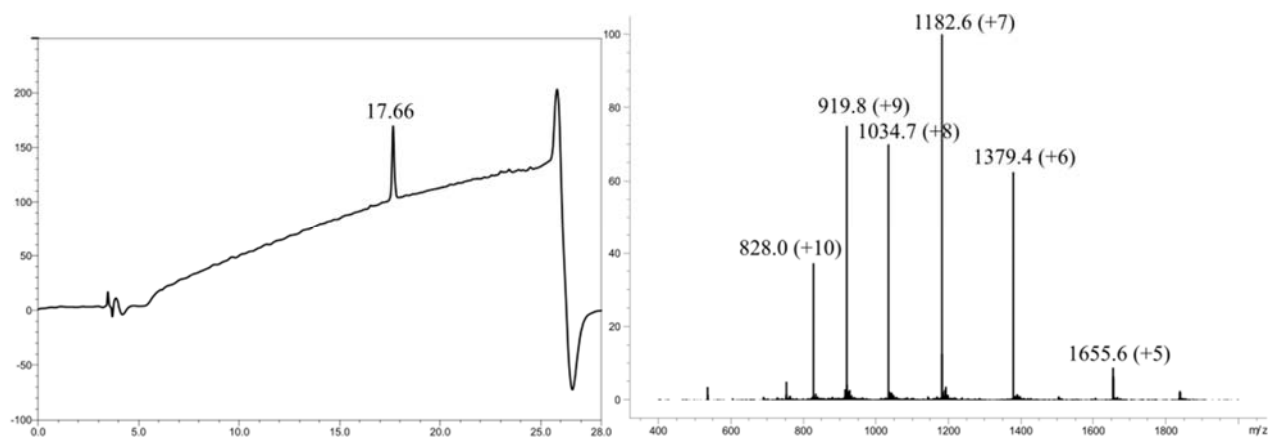

**Figure SC48:** RP-HPLC trace of purified DAGAR (98%);  $R_t$  17.66 min;  $m/z$  (ESI-MS) 1182.6 ( $[M+7H]^+$  requires 1182.8); linear gradient of 5%B to 65%B over 20 min (ca. 3%B/min) at 45 °C, 1 mL/min.

## References

- [1] Harris, P. W. R., Yang, S. H., and Brimble, M. A. (2011) An improved procedure for the preparation of aminomethyl polystyrene resin and its use in solid phase (peptide) synthesis, *Tetrahedron Letters* 52, 6024-6026. doi:10.1016/j.tetlet.2011.09.010
- [2] Jensen, K. J., Meldal, M., and Bock, K. (1993) Glycosylation of phenols: preparation of 1, 2-cis and 1, 2-trans glycosylated tyrosine derivatives to be used in solid-phase glycopeptide synthesis, *Journal of the Chemical Society, Perkin Transactions 1*, 2119-2129.
- [3] Pícha, J., Buděšínský, M., Macháčková, K., Collinsová, M., and Jiráček, J. (2017) Optimized syntheses of Fmoc azido amino acids for the preparation of azidopeptides, *Journal of Peptide Science* 23, 202-214.
